# Supplementary material for: Inhibition of off-target cleavage by RNase H using an artificial cationic oligosaccharide
Source: Royal Society of Chemistry journal article supplement (doi:10.1039/d1ob00983d), 2021-01-01
Supplement: d1ob00983d1.pdf [file d1ob00983d1.pdf]

Supporting information for

## **Inhibition of off-target cleavage by RNase H using an artificial cationic oligosaccharide**

Rintaro Iwata Hara,<sup>a,b,\*</sup> and Takeshi Wada<sup>a,\*</sup>

(a) Department of Medicinal and Life Sciences, Faculty of Pharmaceutical Sciences, Tokyo University of Science, 2641 Yamazaki, Noda, Chiba 278-8510, Japan.

(b) Department of Neurology and Neurological Science, Graduate School of Medical and Dental Sciences, Tokyo Medical and Dental University, 1-5-45, Yushima, Bunkyo-Ku, Tokyo, 113-8519, Japan.

\* E-mail: twada@rs.tus.ac.jp, haranuro@tmd.ac.jp

## **Table of contents**

|                                            |     |
|--------------------------------------------|-----|
| Putative ODAGal4 binding site              | 3   |
| HPLC profiles of DNA/RNA                   | 4   |
| The results of RNase H assay of gapmer/RNA | 166 |
| UV melting analysis                        | 179 |

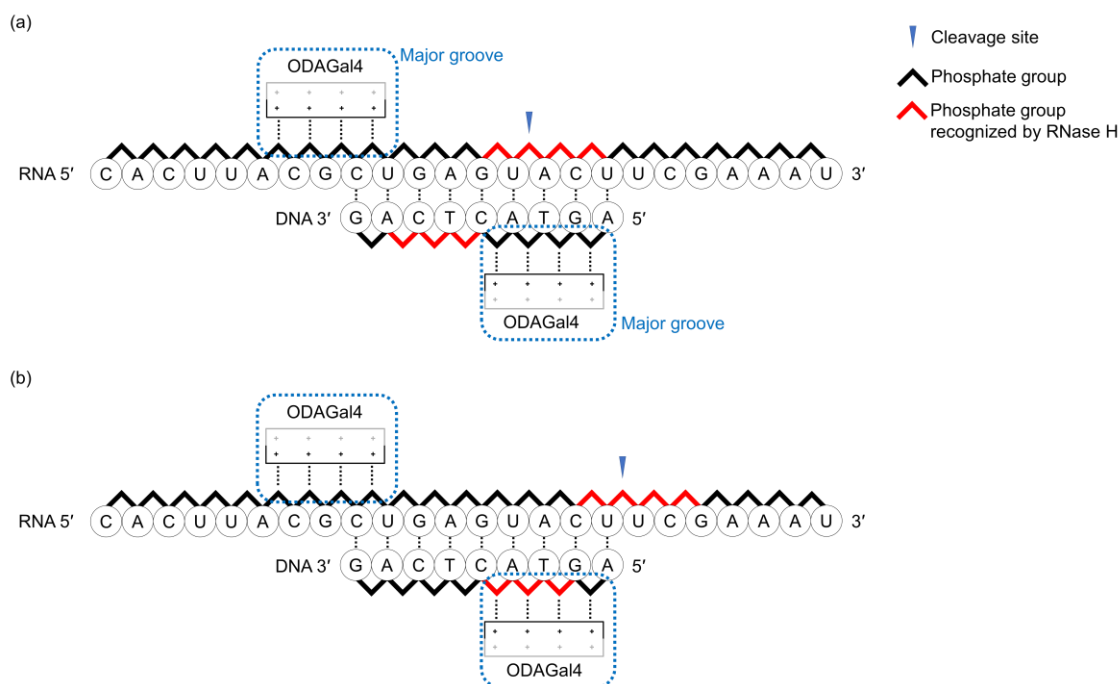

**Figure S1** Putative ODAGal4 binding site on the duplex of a 9mer DNA (D1) and a 24mer RNA (R1). It should be noted that one molecule of ODAGal4 binds to the duplex in each case. It looks two molecules are in each figure just because the duplex structures are depicted in plane and therefore two sides of single ODAGal4 were inevitably depicted separately. (a) When RNase H cleaves the RNA to generate the 10mer p-RNA, RNase H would compete with ODAGal4. (b) When RNase H cleaves the RNA to generate the 7mer p-RNA, RNase H would compete with ODAGal4 for the phosphate groups of the RNA strand.

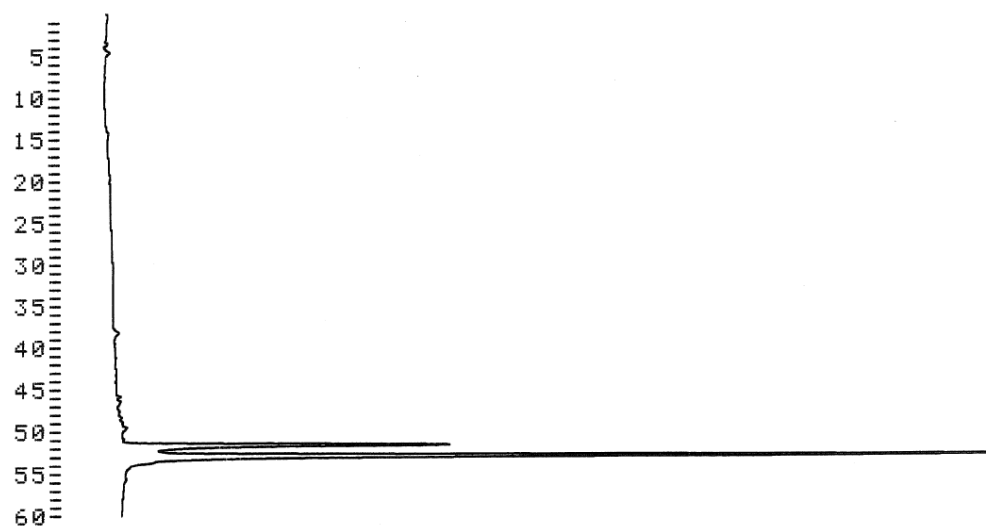

| NO.   | RT    | AREA    |            |
|-------|-------|---------|------------|
| 1     | 51.58 | 1868862 | DNA        |
| 2     | 52.80 | 4490359 | intact RNA |
| TOTAL |       | 6359221 |            |

**Figure S2** RP-HPLC profile of the mixture of a 9mer DNA (D1) and a 24mer RNA (R1). The RP-HPLC analysis (UV detection at 260 nm) was performed with a linear gradient of 0%–12% CH<sub>3</sub>CN in 0.1 M TEAA buffer (pH 7.0) at 50 °C for 60 min with a flow rate of 0.5 mL/min.

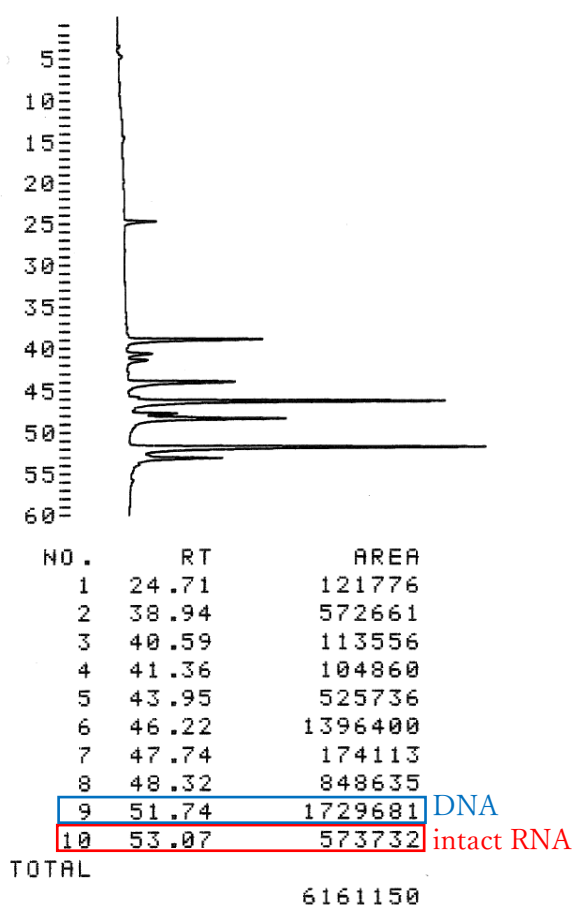

**Figure S3** RP-HPLC profile of the mixture of a 9mer DNA (D1) and a 24mer RNA (R1) in the absence of ODAGal4 after treatment with RNase H for 5 min (Figure 4). The RP-HPLC analysis (UV detection at 260 nm) was performed with a linear gradient of 0%–12% CH<sub>3</sub>CN in 0.1 M TEAA buffer (pH 7.0) at 50 °C for 60 min with a flow rate of 0.5 mL/min.

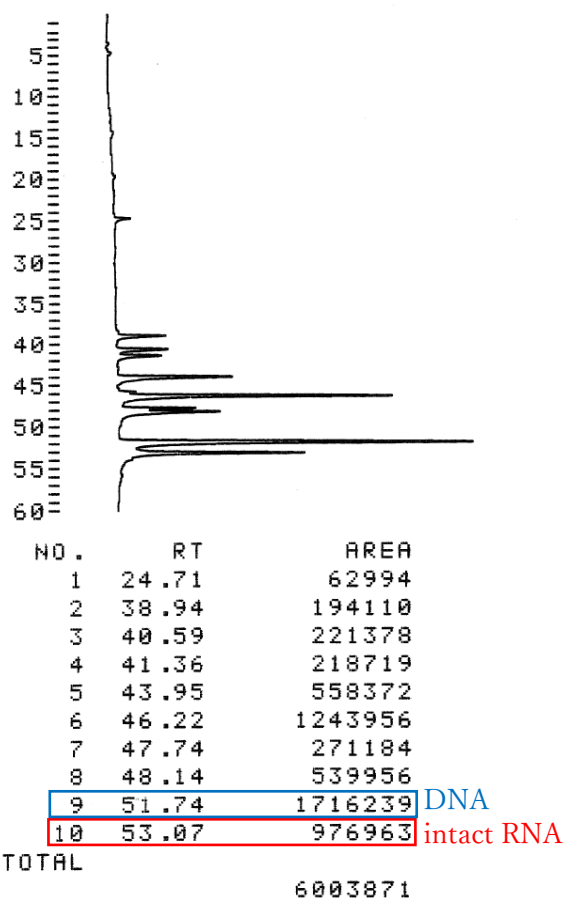

**Figure S4** RP-HPLC profile of the mixture of a 9mer DNA (D1) and a 24mer RNA (R1) in the presence of ODAGal4 after treatment with RNase H for 5 min (Figure 4). The RP-HPLC analysis (UV detection at 260 nm) was performed with a linear gradient of 0%–12% CH<sub>3</sub>CN in 0.1 M TEAA buffer (pH 7.0) at 50 °C for 60 min with a flow rate of 0.5 mL/min.

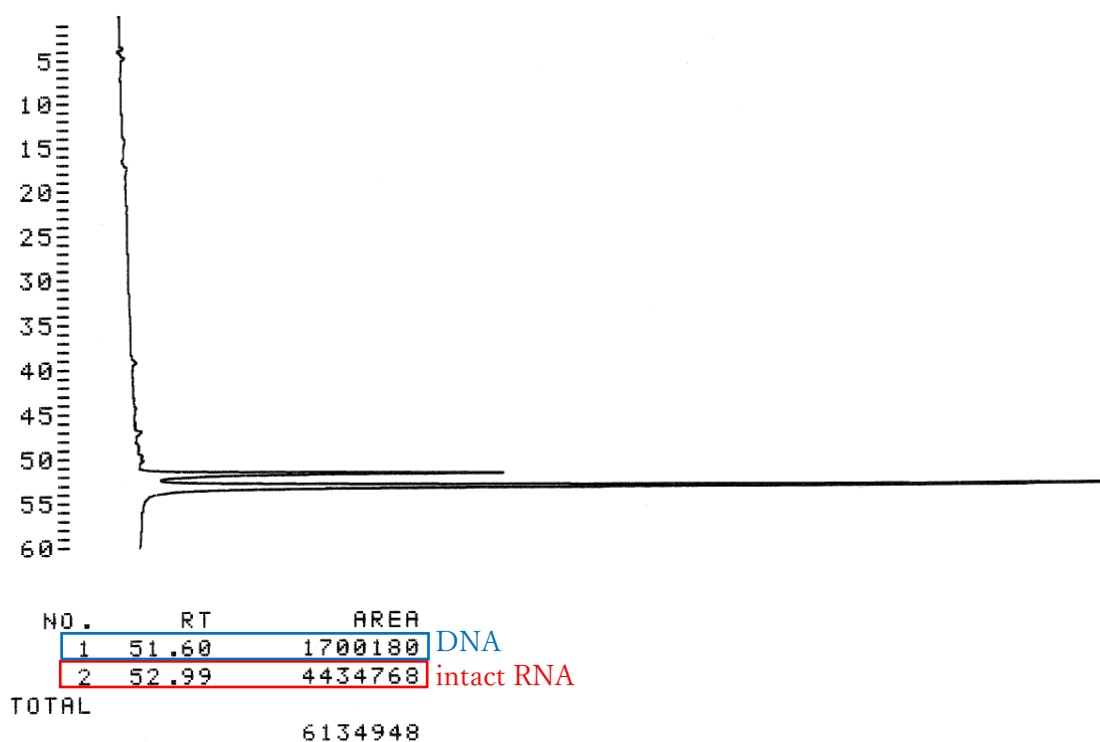

**Figure S5** RP-HPLC profile of the mixture of a 9mer DNA (D1) and a 24mer RNA (R2). The RP-HPLC analysis (UV detection at 260 nm) was performed with a linear gradient of 0%–12% CH<sub>3</sub>CN in 0.1 M TEAA buffer (pH 7.0) at 50 °C for 60 min with a flow rate of 0.5 mL/min.

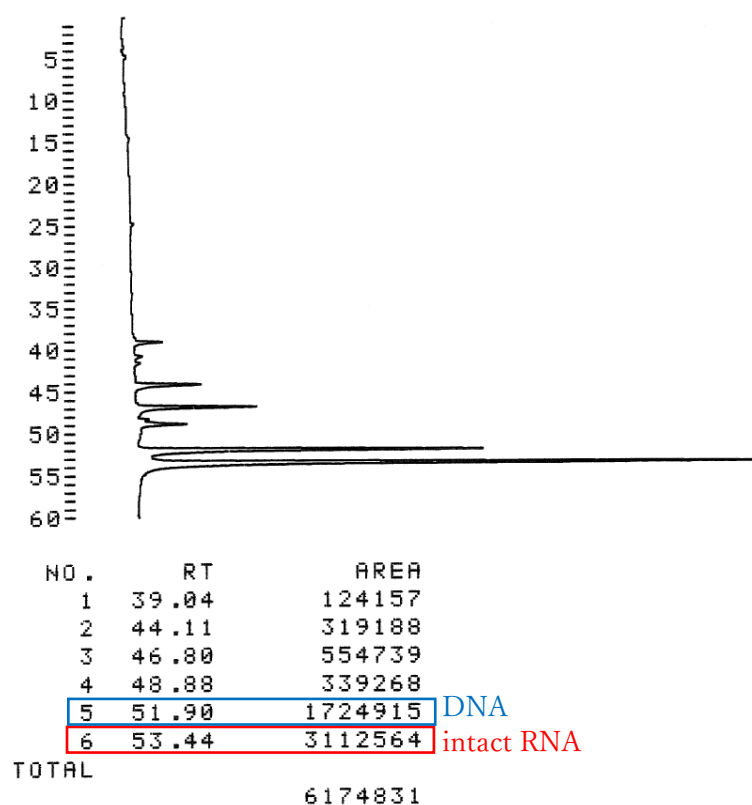

**Figure S6** RP-HPLC profile of the mixture of a 9mer DNA (D1) and a 24mer RNA (R2) in the absence of ODAGal4 after treatment with RNase H for 5 min (Figure 4). The RP-HPLC analysis (UV detection at 260 nm) was performed with a linear gradient of 0%–12% CH<sub>3</sub>CN in 0.1 M TEAA buffer (pH 7.0) at 50 °C for 60 min with a flow rate of 0.5 mL/min.

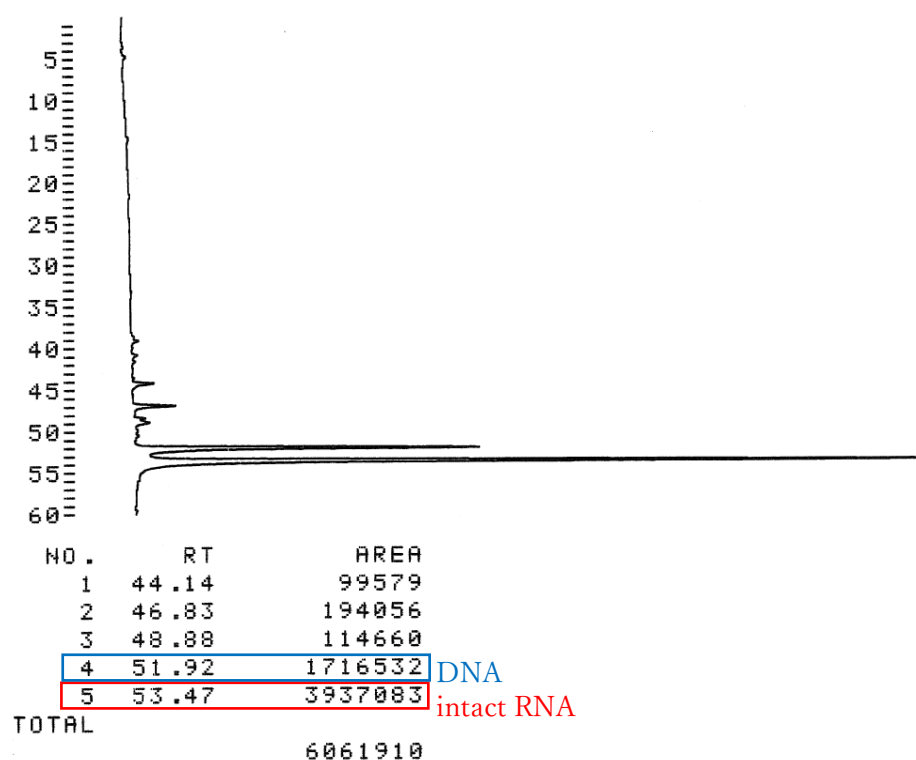

**Figure S7** RP-HPLC profile of the mixture of a 9mer DNA (D1) and a 24mer RNA (R2) in the presence of ODAGal4 after treatment with RNase H for 5 min (Figure 4). The RP-HPLC analysis (UV detection at 260 nm) was performed with a linear gradient of 0%–12% CH<sub>3</sub>CN in 0.1 M TEAA buffer (pH 7.0) at 50 °C for 60 min with a flow rate of 0.5 mL/min.

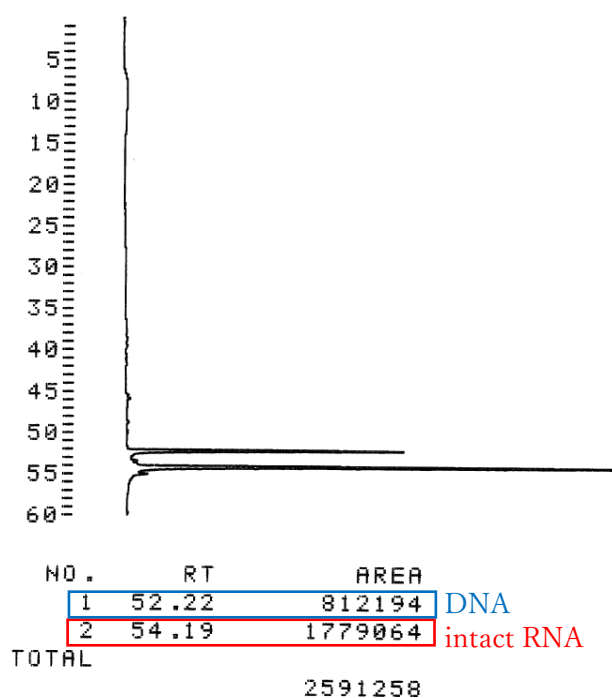

**Figure S8** RP-HPLC profile of the mixture of a 9mer DNA (D1) and a 24mer RNA (R3). The RP-HPLC analysis (UV detection at 260 nm) was performed with a linear gradient of 0%–10% CH<sub>3</sub>CN in 0.1 M TEAA buffer (pH 7.0) at 50 °C for 60 min with a flow rate of 1.0 mL/min.

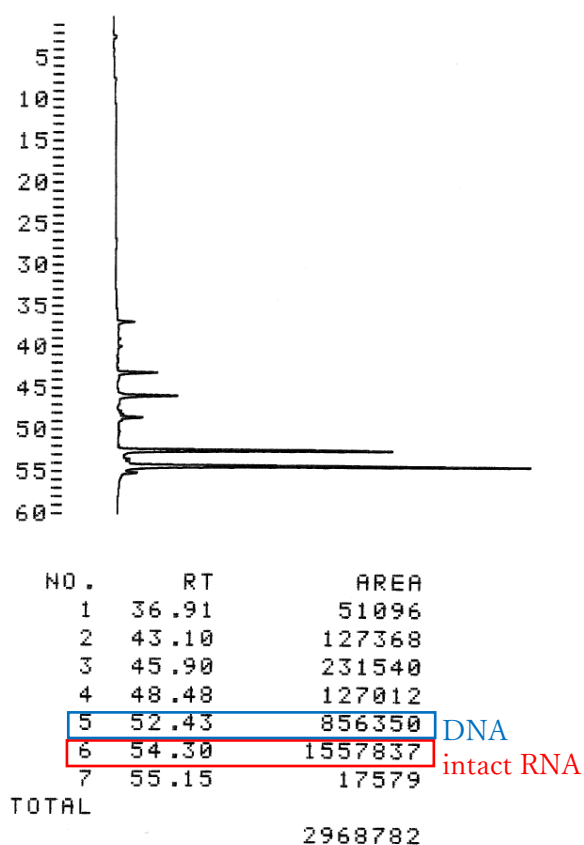

**Figure S9** RP-HPLC profile of the mixture of a 9mer DNA (D1) and a 24mer RNA (R3) in the absence of ODAGal4 after treatment with RNase H for 5 min (Figure 4). The RP-HPLC analysis (UV detection at 260 nm) was performed with a linear gradient of 0%–10% CH<sub>3</sub>CN in 0.1 M TEAA buffer (pH 7.0) at 50 °C for 60 min with a flow rate of 1.0 mL/min.

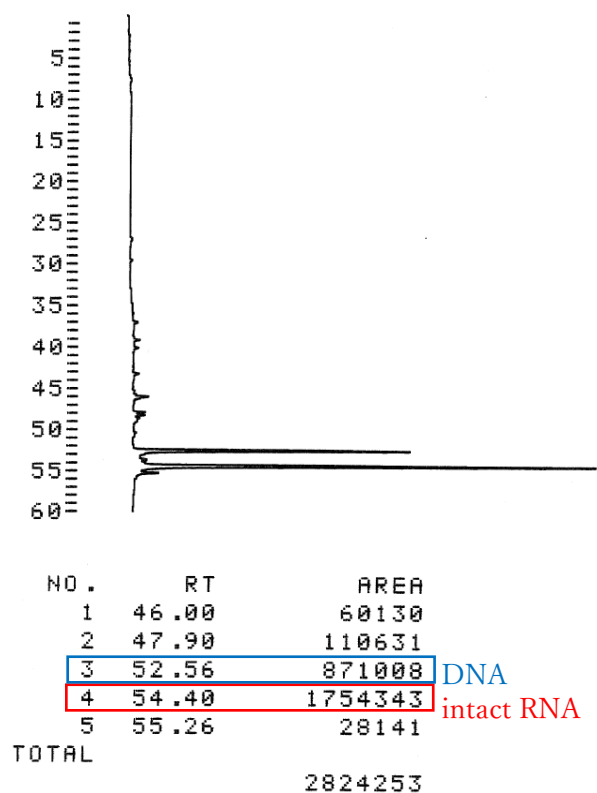

**Figure S10** RP-HPLC profile of the mixture of a 9mer DNA (D1) and a 24mer RNA (R3) in the presence of ODAGal4 after treatment with RNase H for 5 min (Figure 4). The RP-HPLC analysis (UV detection at 260 nm) was performed with a linear gradient of 0%–10% CH<sub>3</sub>CN in 0.1 M TEAA buffer (pH 7.0) at 50 °C for 60 min with a flow rate of 1.0 mL/min.

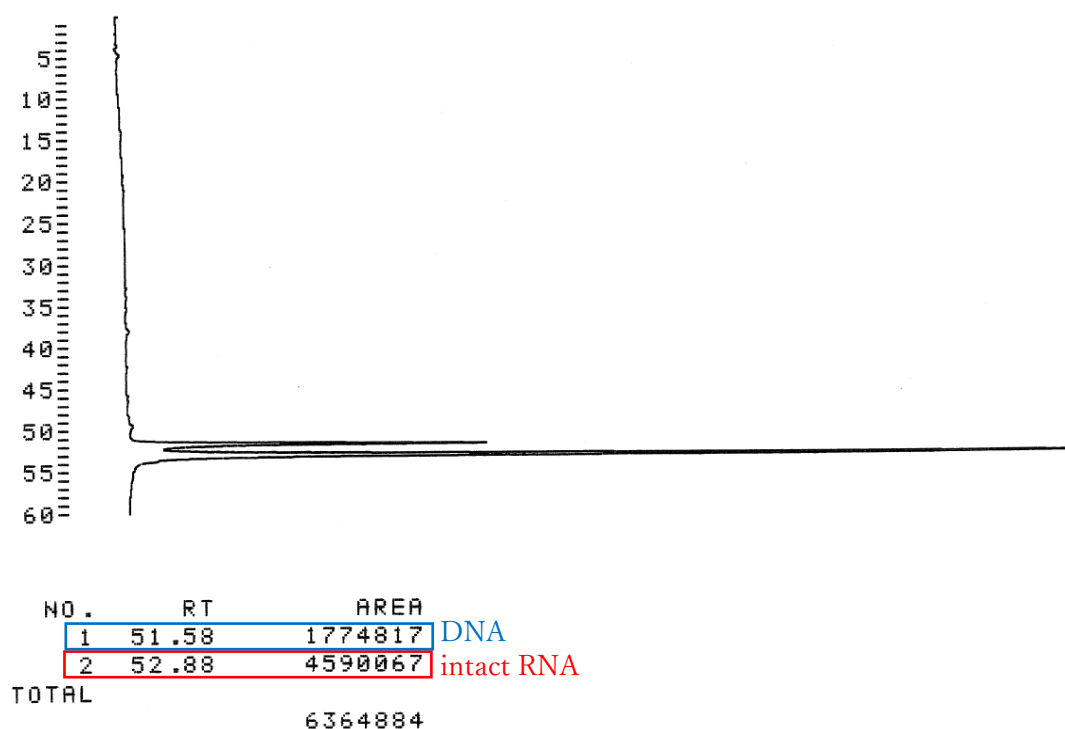

**Figure S11** RP-HPLC profile of the mixture of a 9mer DNA (D1) and a 24mer RNA (R4). The RP-HPLC analysis (UV detection at 260 nm) was performed with a linear gradient of 0%–12% CH<sub>3</sub>CN in 0.1 M TEAA buffer (pH 7.0) at 50 °C for 60 min with a flow rate of 0.5 mL/min.

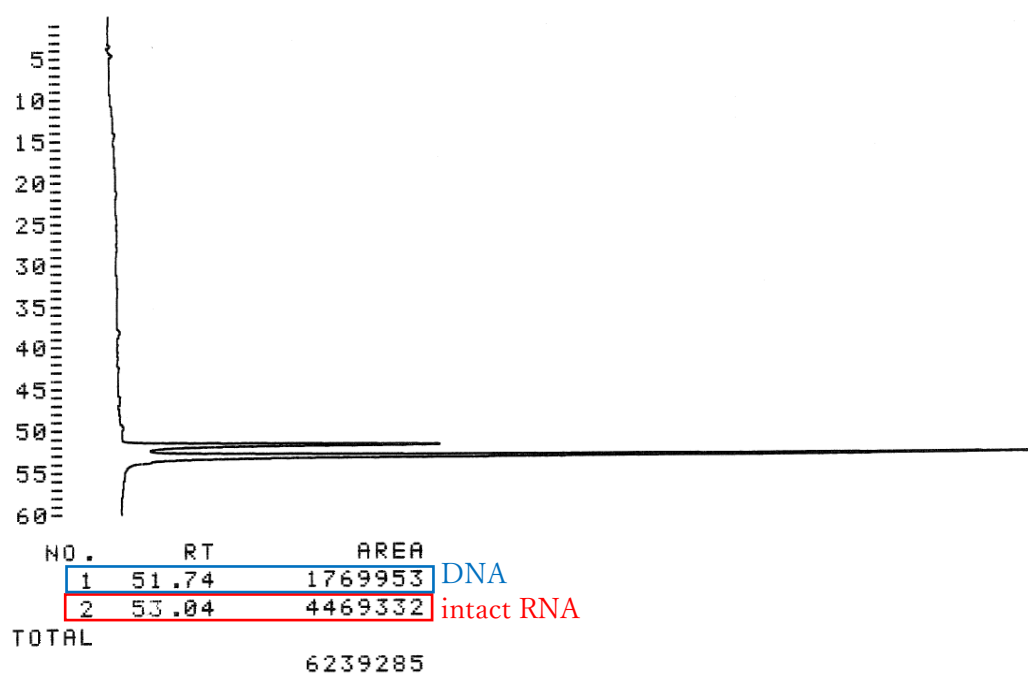

**Figure S12** RP-HPLC profile of the mixture of a 9mer DNA (D1) and a 24mer RNA (R4) in the absence of ODAGal4 after treatment with RNase H for 5 min (Figure 4). The RP-HPLC analysis (UV detection at 260 nm) was performed with a linear gradient of 0%–12% CH<sub>3</sub>CN in 0.1 M TEAA buffer (pH 7.0) at 50 °C for 60 min with a flow rate of 0.5 mL/min.

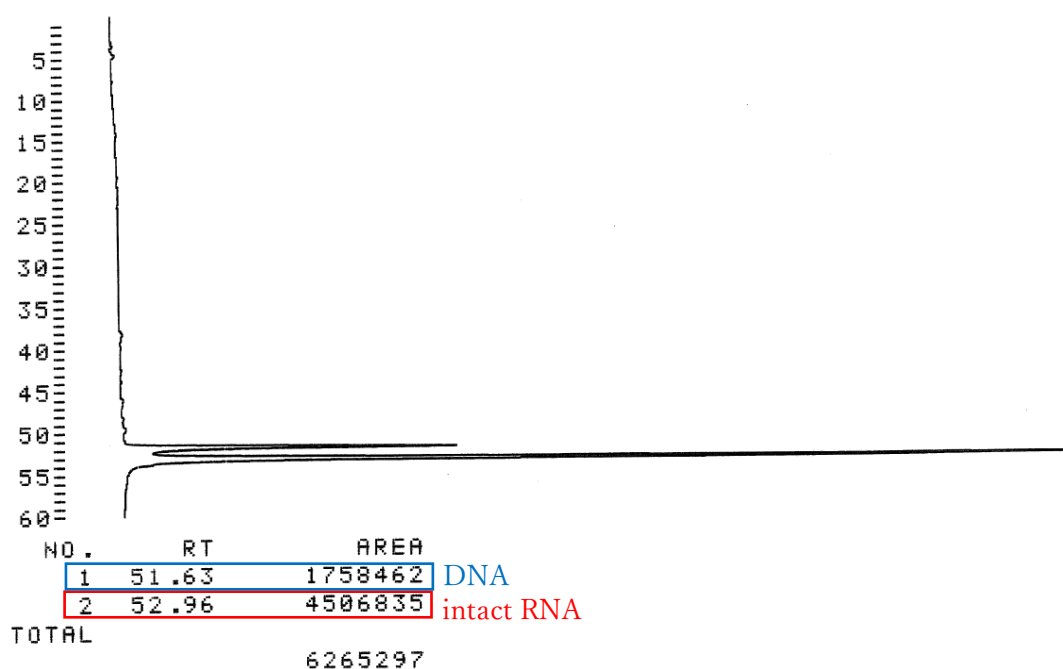

**Figure S13** RP-HPLC profile of the mixture of a 9mer DNA (D1) and a 24mer RNA (R4) in the presence of ODAGal4 after treatment with RNase H for 5 min (Figure 4). The RP-HPLC analysis (UV detection at 260 nm) was performed with a linear gradient of 0%–12% CH<sub>3</sub>CN in 0.1 M TEAA buffer (pH 7.0) at 50 °C for 60 min with a flow rate of 0.5 mL/min.

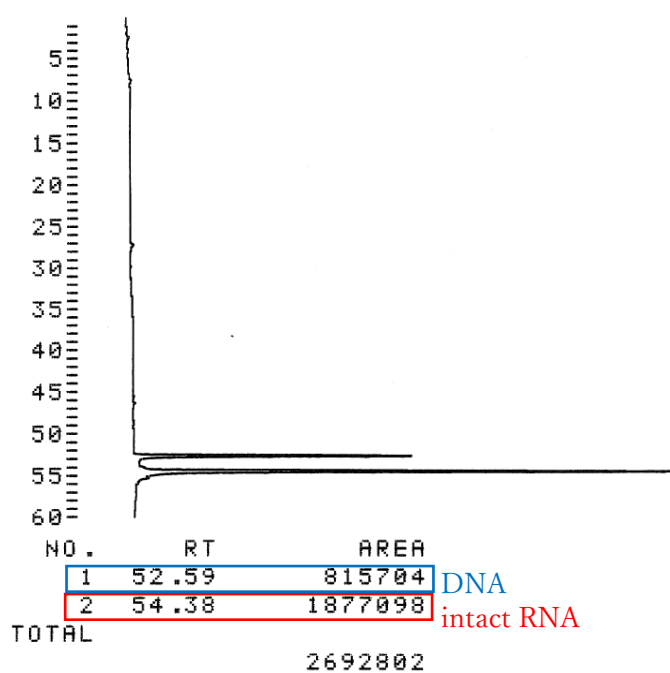

**Figure S14** RP-HPLC profile of the mixture of a 9mer DNA (D1) and a 24mer RNA (R5). The RP-HPLC analysis (UV detection at 260 nm) was performed with a linear gradient of 0%–10% CH<sub>3</sub>CN in 0.1 M TEAA buffer (pH 7.0) at 50 °C for 60 min with a flow rate of 1.0 mL/min.

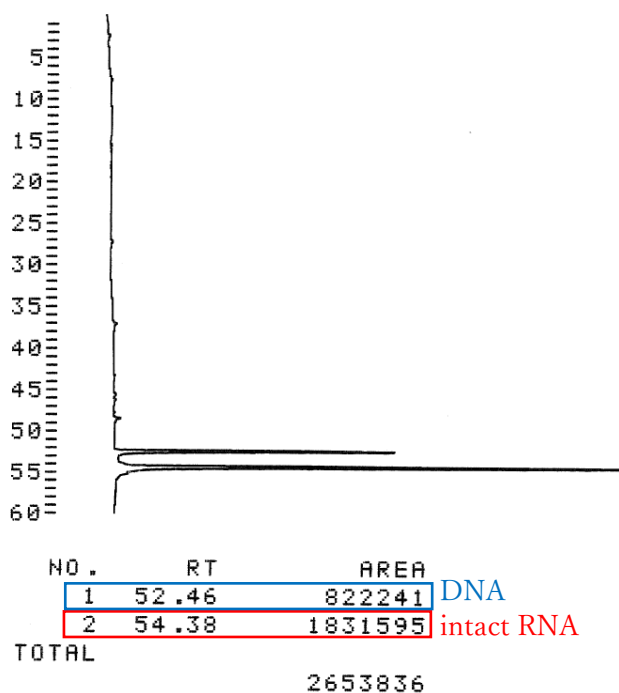

**Figure S15** RP-HPLC profile of the mixture of a 9mer DNA (D1) and a 24mer RNA (R5) in the absence of ODAGal4 after treatment with RNase H for 5 min (Figure 4). The RP-HPLC analysis (UV detection at 260 nm) was performed with a linear gradient of 0%–10% CH<sub>3</sub>CN in 0.1 M TEAA buffer (pH 7.0) at 50 °C for 60 min with a flow rate of 1.0 mL/min.

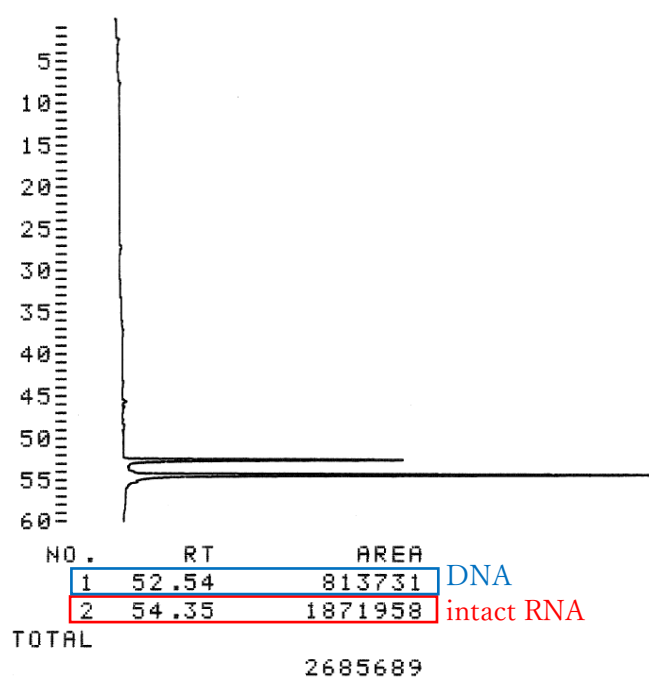

**Figure S16** RP-HPLC profile of the mixture of a 9mer DNA (D1) and a 24mer RNA (R5) in the presence of ODAGal4 after treatment with RNase H for 5 min (Figure 4). The RP-HPLC analysis (UV detection at 260 nm) was performed with a linear gradient of 0%–10% CH<sub>3</sub>CN in 0.1 M TEAA buffer (pH 7.0) at 50 °C for 60 min with a flow rate of 1.0 mL/min.

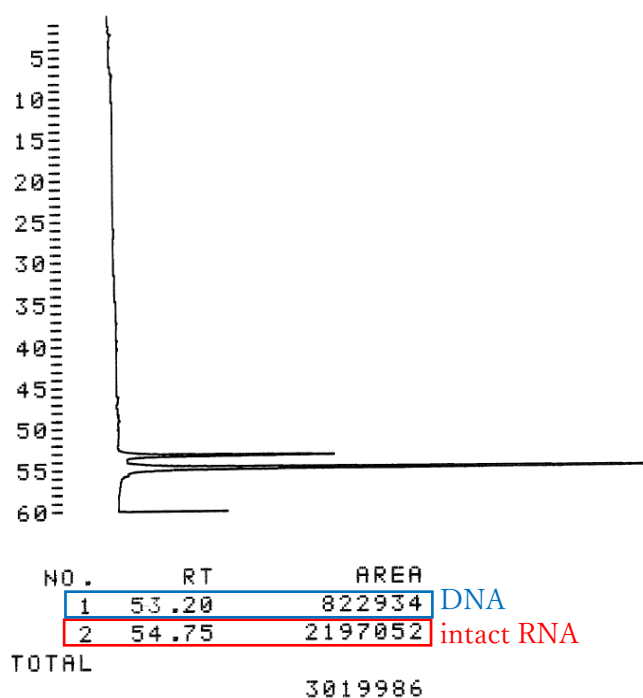

**Figure S17** RP-HPLC profile of the mixture of a 9mer DNA (D1) and a 24mer RNA (R6). The RP-HPLC analysis (UV detection at 260 nm) was performed with a linear gradient of 0%–10% CH<sub>3</sub>CN in 0.1 M TEAA buffer (pH 7.0) at 50 °C for 60 min with a flow rate of 1.0 mL/min.

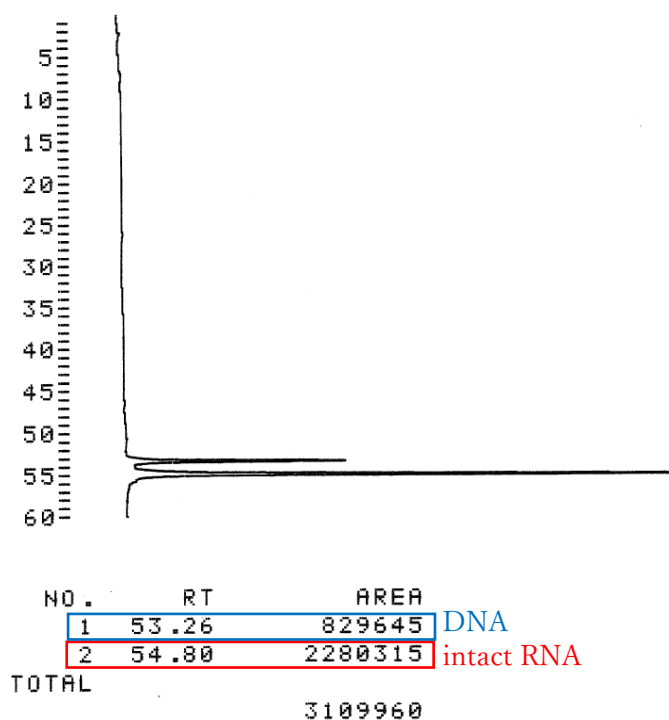

**Figure S18** RP-HPLC profile of the mixture of a 9mer DNA (D1) and a 24mer RNA (R6) in the absence of ODAGal4 after treatment with RNase H for 5 min (Figure 4). The RP-HPLC analysis (UV detection at 260 nm) was performed with a linear gradient of 0%–10% CH<sub>3</sub>CN in 0.1 M TEAA buffer (pH 7.0) at 50 °C for 60 min with a flow rate of 1.0 mL/min.

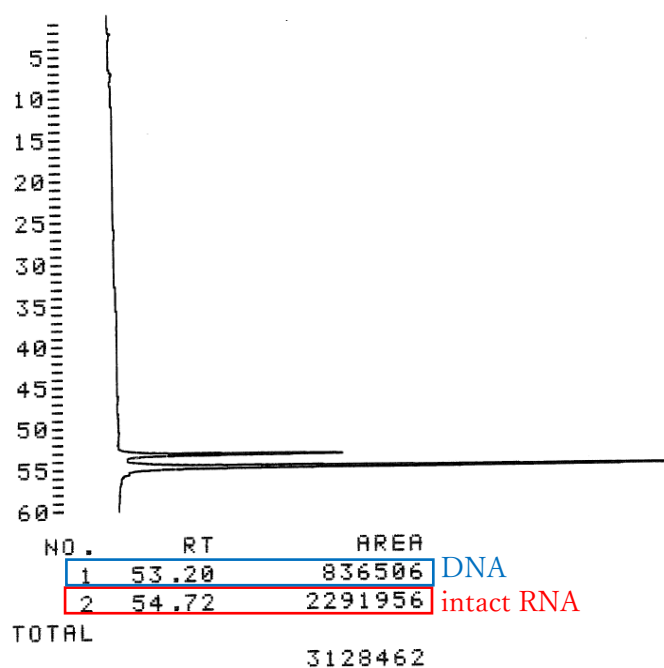

**Figure S19** RP-HPLC profile of the mixture of a 9mer DNA (D1) and a 24mer RNA (R6) in the presence of ODAGal4 after treatment with RNase H for 5 min (Figure 4). The RP-HPLC analysis (UV detection at 260 nm) was performed with a linear gradient of 0%–10% CH<sub>3</sub>CN in 0.1 M TEAA buffer (pH 7.0) at 50 °C for 60 min with a flow rate of 1.0 mL/min.

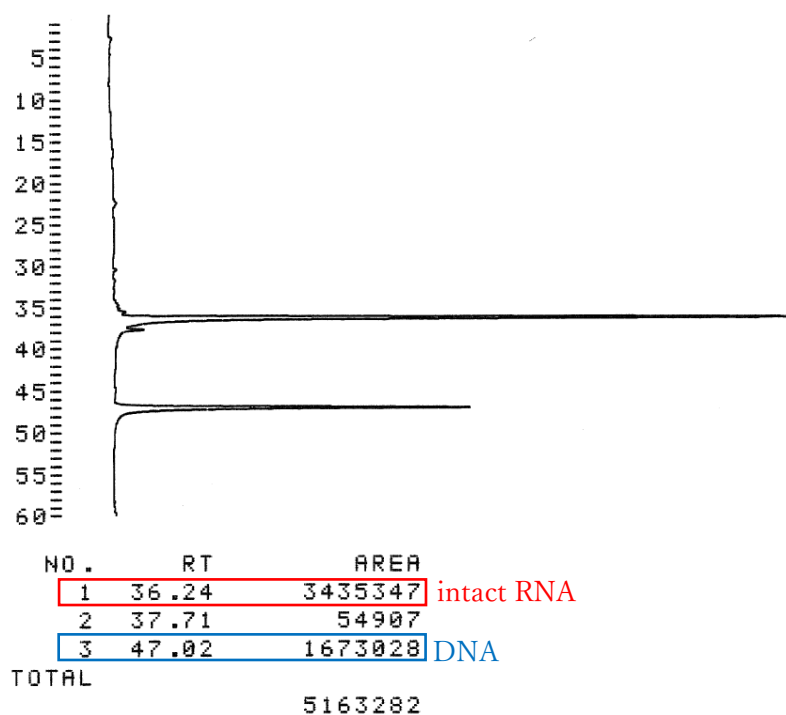

**Figure S20** RP-HPLC profile of the mixture of a 9mer DNA (D1) and a 24mer RNA (R7). The RP-HPLC analysis (UV detection at 260 nm) was performed with a linear gradient of 0%–10% CH<sub>3</sub>CN in 0.1 M ammonium acetate (AA) buffer (pH 7.0) at 50 °C for 60 min with a flow rate of 0.5 mL/min.

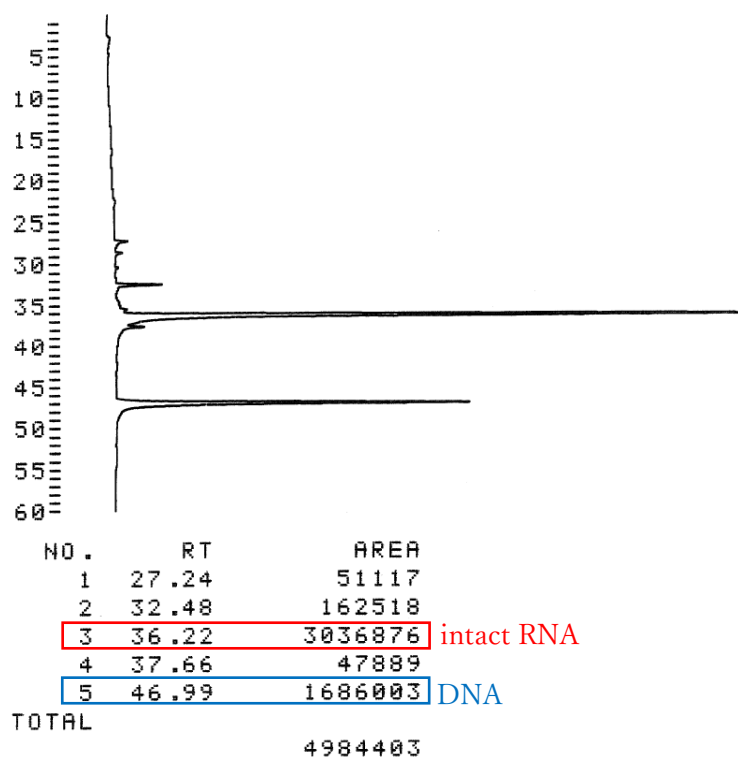

**Figure S21** RP-HPLC profile of the mixture of a 9mer DNA (D1) and a 24mer RNA (R7) in the absence of ODAGal4 after treatment with RNase H for 5 min (Figure 4). The RP-HPLC analysis (UV detection at 260 nm) was performed with a linear gradient of 0%–10% CH<sub>3</sub>CN in 0.1 M AA buffer (pH 7.0) at 50 °C for 60 min with a flow rate of 0.5 mL/min.

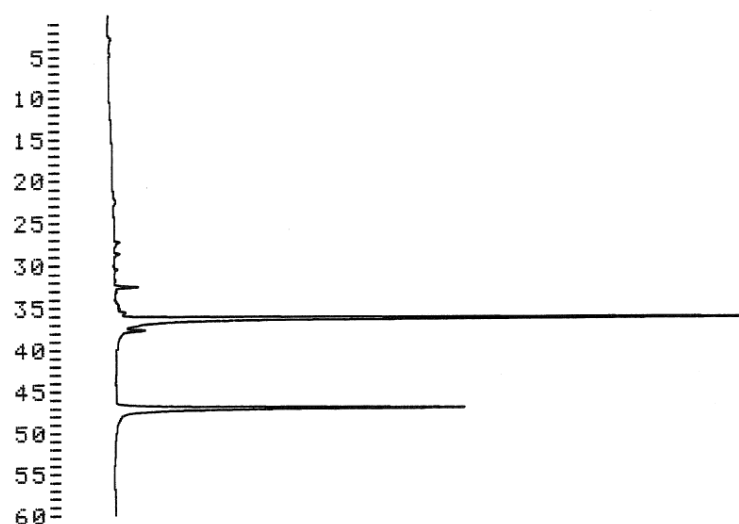

| NO.   | RT    | AREA    |
|-------|-------|---------|
| 1     | 32.51 | 84597   |
| 2     | 36.24 | 3127350 |
| 3     | 37.71 | 53388   |
| 4     | 47.04 | 1634145 |
| TOTAL |       | 4899480 |

intact RNA

DNA

**Figure S22** RP-HPLC profile of the mixture of a 9mer DNA (D1) and a 24mer RNA (R7) in the presence of ODAGal4 after treatment with RNase H for 5 min (Figure 4). The RP-HPLC analysis (UV detection at 260 nm) was performed with a linear gradient of 0%–10% CH<sub>3</sub>CN in 0.1 M AA buffer (pH 7.0) at 50 °C for 60 min with a flow rate of 0.5 mL/min.

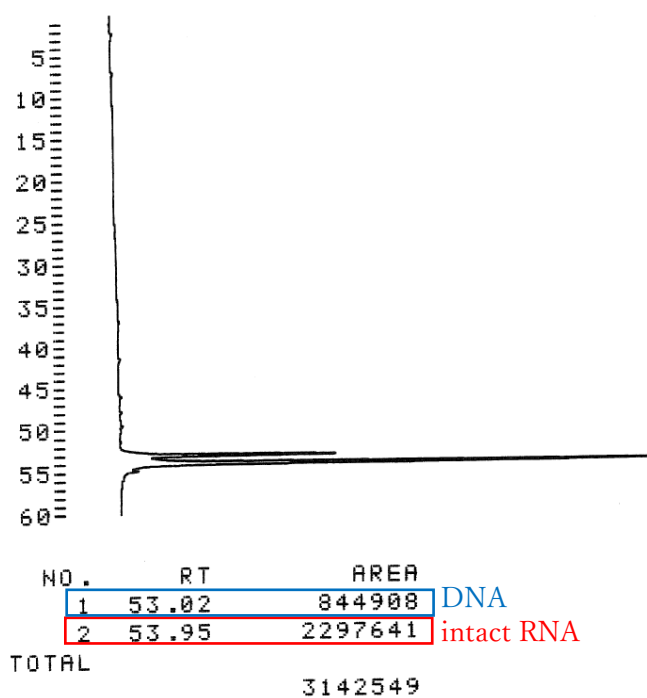

**Figure S23** RP-HPLC profile of the mixture of a 9mer DNA (D1) and a 24mer RNA (R8). The RP-HPLC analysis (UV detection at 260 nm) was performed with a linear gradient of 0%–10% CH<sub>3</sub>CN in 0.1 M TEAA buffer (pH 7.0) at 50 °C for 60 min with a flow rate of 1.0 mL/min.

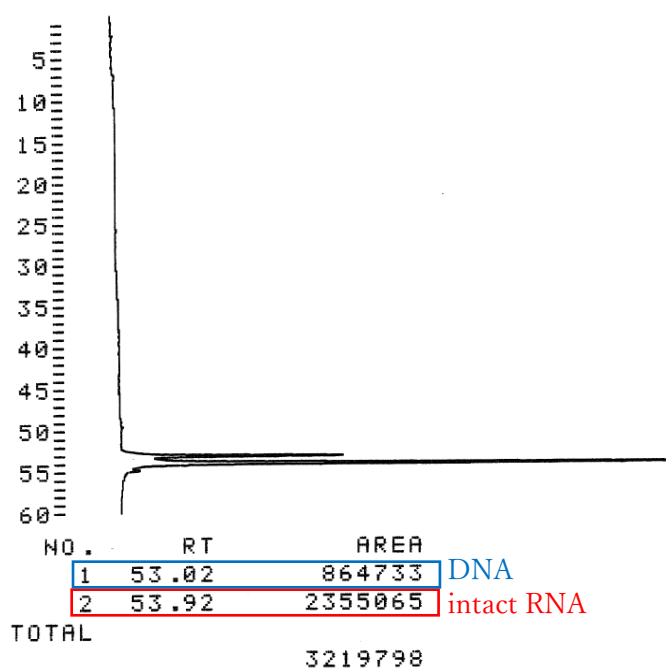

**Figure S24** RP-HPLC profile of the mixture of a 9mer DNA (D1) and a 24mer RNA (R8) in the absence of ODAGal4 after treatment with RNase H for 5 min (Figure 4). The RP-HPLC analysis (UV detection at 260 nm) was performed with a linear gradient of 0%–10% CH<sub>3</sub>CN in 0.1 M TEAA buffer (pH 7.0) at 50 °C for 60 min with a flow rate of 1.0 mL/min.

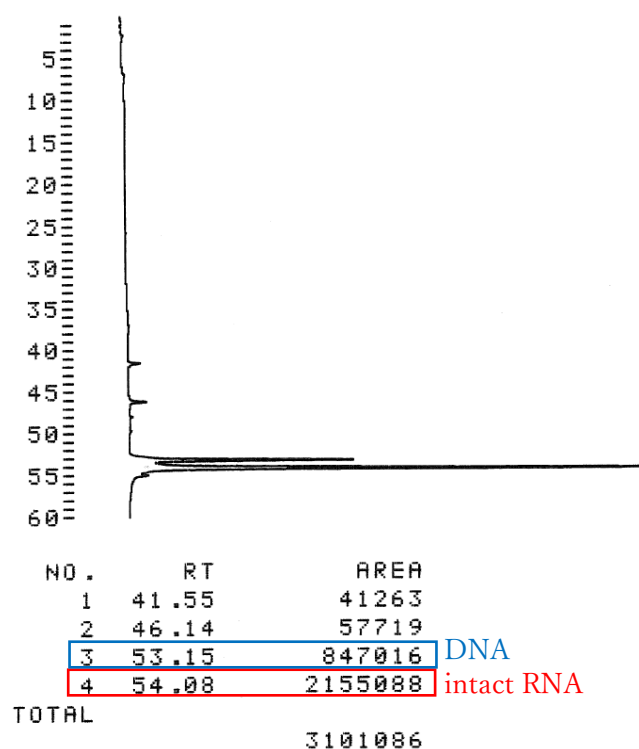

**Figure S25** RP-HPLC profile of the mixture of a 9mer DNA (D1) and a 24mer RNA (R8) in the presence of ODAGal4 after treatment with RNase H for 5 min (Figure 4). The RP-HPLC analysis (UV detection at 260 nm) was performed with a linear gradient of 0%–10% CH<sub>3</sub>CN in 0.1 M TEAA buffer (pH 7.0) at 50 °C for 60 min with a flow rate of 1.0 mL/min.

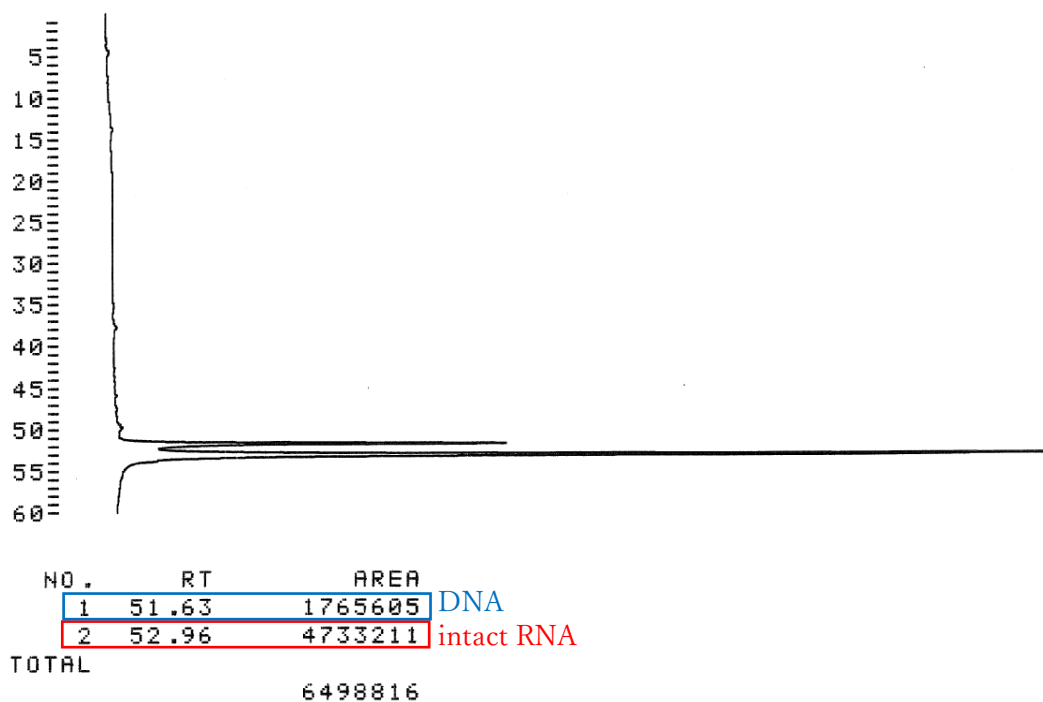

**Figure S26** RP-HPLC profile of the mixture of a 9mer DNA (D1) and a 24mer RNA (R9). The RP-HPLC analysis (UV detection at 260 nm) was performed with a linear gradient of 0%–12% CH<sub>3</sub>CN in 0.1 M TEAA buffer (pH 7.0) at 50 °C for 60 min with a flow rate of 0.5 mL/min.

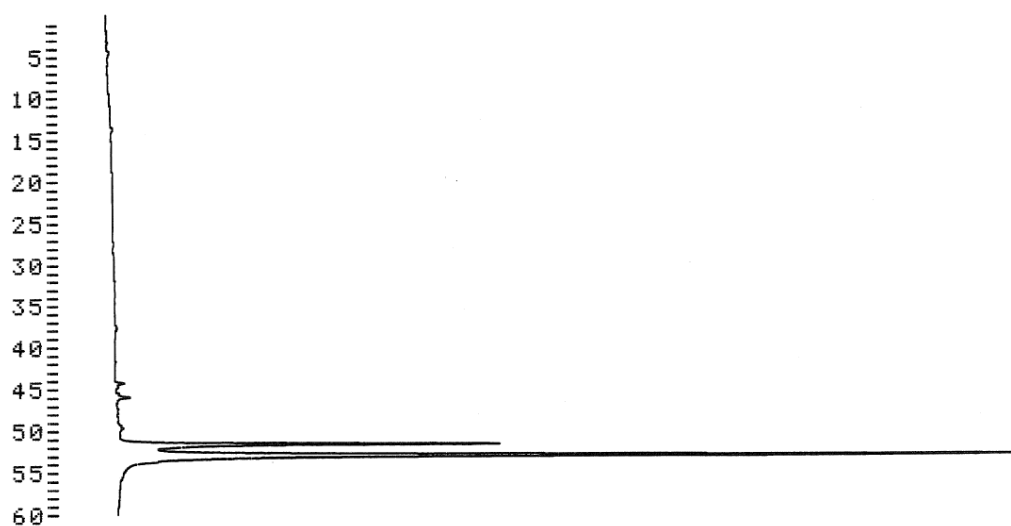

| NO.   | RT    | AREA    |
|-------|-------|---------|
| 1     | 45.98 | 64278   |
| 2     | 51.63 | 1714127 |
| 3     | 52.96 | 4485705 |
| TOTAL |       | 6264110 |

DNA

intact RNA

**Figure S27** RP-HPLC profile of the mixture of a 9mer DNA (D1) and a 24mer RNA (R9) in the absence of ODAGal4 after treatment with RNase H for 5 min (Figure 4). The RP-HPLC analysis (UV detection at 260 nm) was performed with a linear gradient of 0%–12% CH<sub>3</sub>CN in 0.1 M TEAA buffer (pH 7.0) at 50 °C for 60 min with a flow rate of 0.5 mL/min.

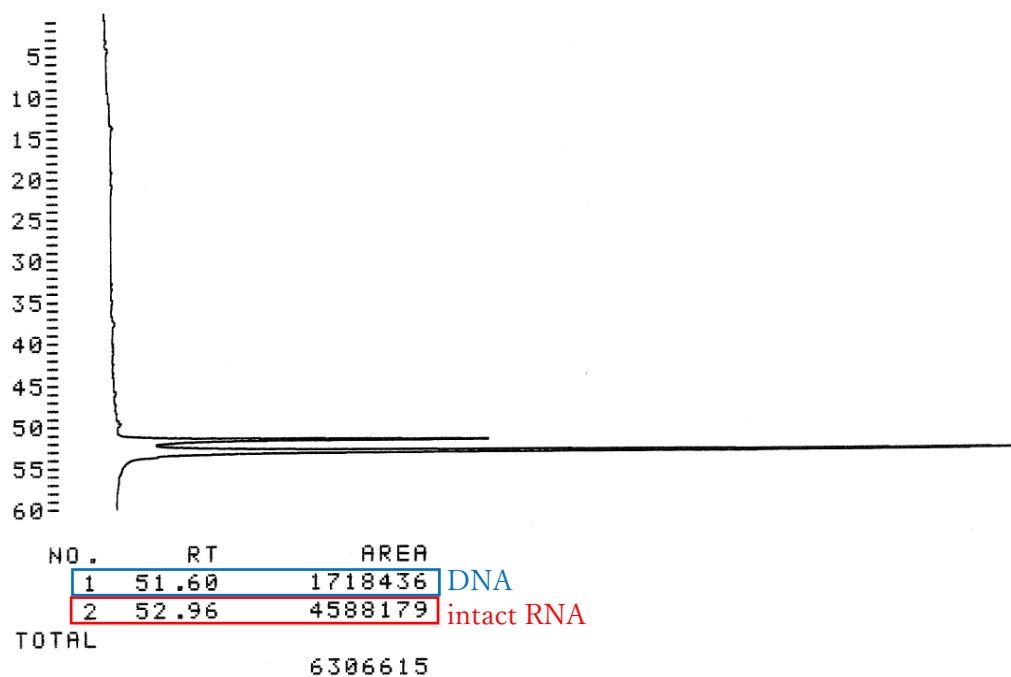

**Figure S28** RP-HPLC profile of the mixture of a 9mer DNA (D1) and a 24mer RNA (R9) in the presence of ODAGal4 after treatment with RNase H for 5 min (Figure 4). The RP-HPLC analysis (UV detection at 260 nm) was performed with a linear gradient of 0%–12% CH<sub>3</sub>CN in 0.1 M TEAA buffer (pH 7.0) at 50 °C for 60 min with a flow rate of 0.5 mL/min.

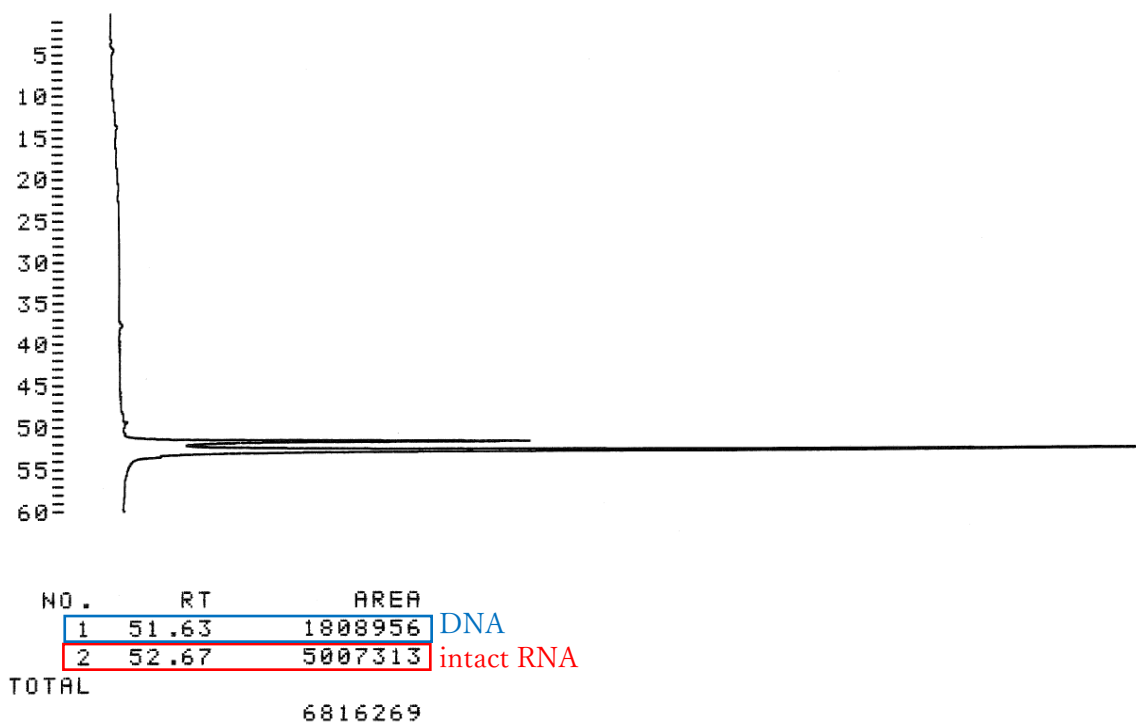

**Figure S29** RP-HPLC profile of the mixture of a 9mer DNA (D1) and a 24mer RNA (R10). The RP-HPLC analysis (UV detection at 260 nm) was performed with a linear gradient of 0%–12% CH<sub>3</sub>CN in 0.1 M TEAA buffer (pH 7.0) at 50 °C for 60 min with a flow rate of 0.5 mL/min.

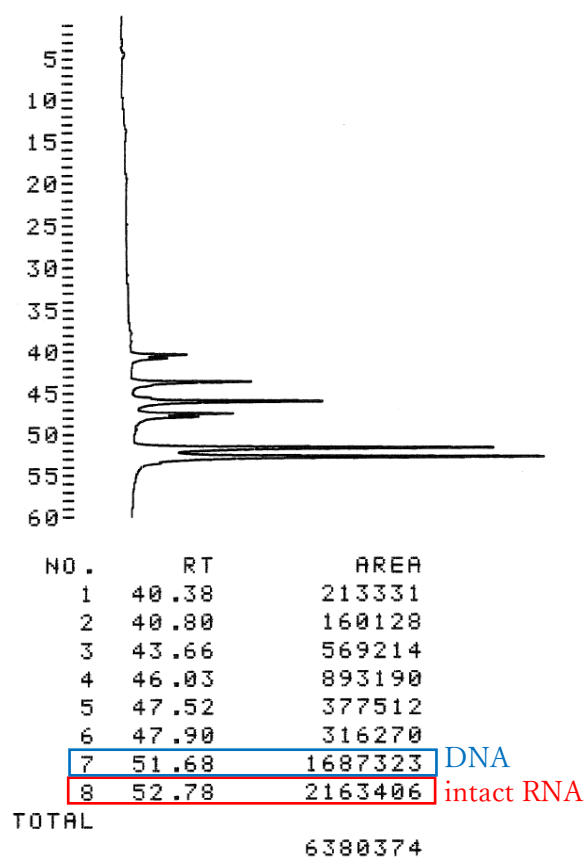

**Figure S30** RP-HPLC profile of the mixture of a 9mer DNA (D1) and a 24mer RNA (R10) in the absence of ODAGal4 after treatment with RNase H for 5 min (Figure 4). The RP-HPLC analysis (UV detection at 260 nm) was performed with a linear gradient of 0%–12% CH<sub>3</sub>CN in 0.1 M TEAA buffer (pH 7.0) at 50 °C for 60 min with a flow rate of 0.5 mL/min.

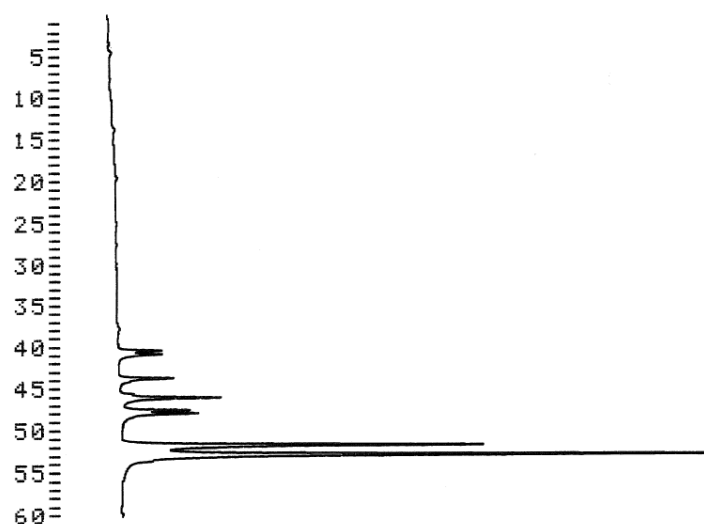

| NO.   | RT    | AREA    |
|-------|-------|---------|
| 1     | 40.46 | 160234  |
| 2     | 40.88 | 199019  |
| 3     | 43.76 | 265787  |
| 4     | 46.08 | 505960  |
| 5     | 47.60 | 261518  |
| 6     | 47.98 | 370656  |
| 7     | 51.74 | 1758467 |
| 8     | 52.83 | 3039846 |
| TOTAL |       | 6561487 |

DNA

intact RNA

**Figure S31** RP-HPLC profile of the mixture of a 9mer DNA (D1) and a 24mer RNA (R10) in the presence of ODAGal4 after treatment with RNase H for 5 min (Figure 4). The RP-HPLC analysis (UV detection at 260 nm) was performed with a linear gradient of 0%–12% CH<sub>3</sub>CN in 0.1 M TEAA buffer (pH 7.0) at 50 °C for 60 min with a flow rate of 0.5 mL/min.

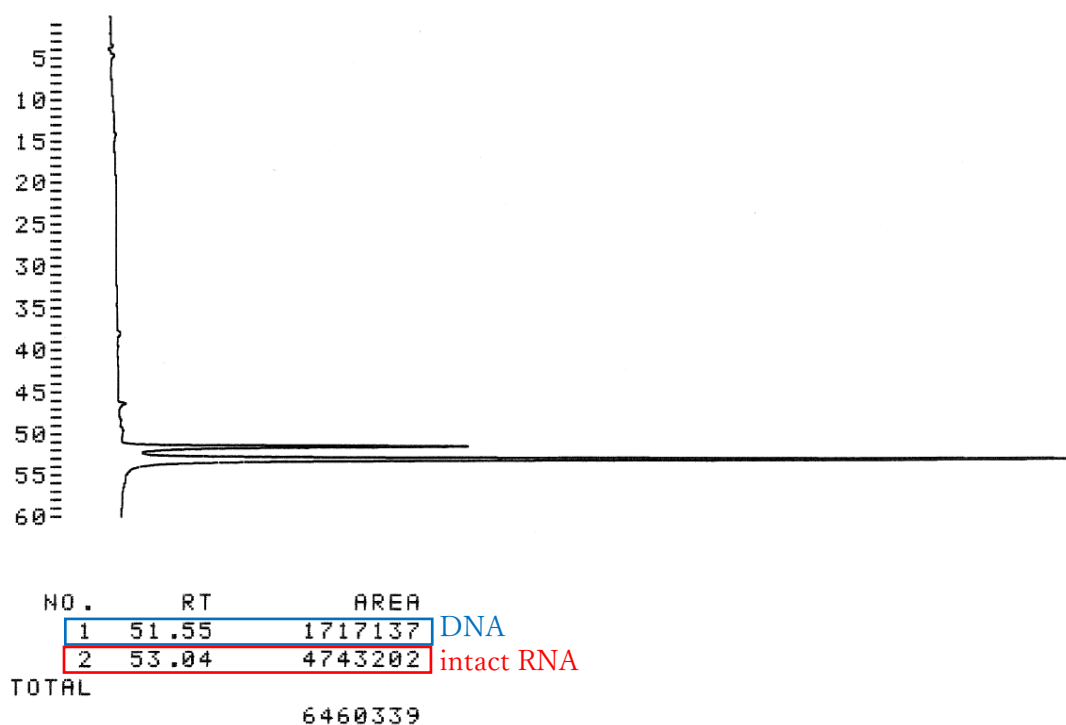

**Figure S32** RP-HPLC profile of the mixture of a 9mer DNA (D1) and a 24mer RNA (R11). The RP-HPLC analysis (UV detection at 260 nm) was performed with a linear gradient of 0%–12% CH<sub>3</sub>CN in 0.1 M TEAA buffer (pH 7.0) at 50 °C for 60 min with a flow rate of 0.5 mL/min.

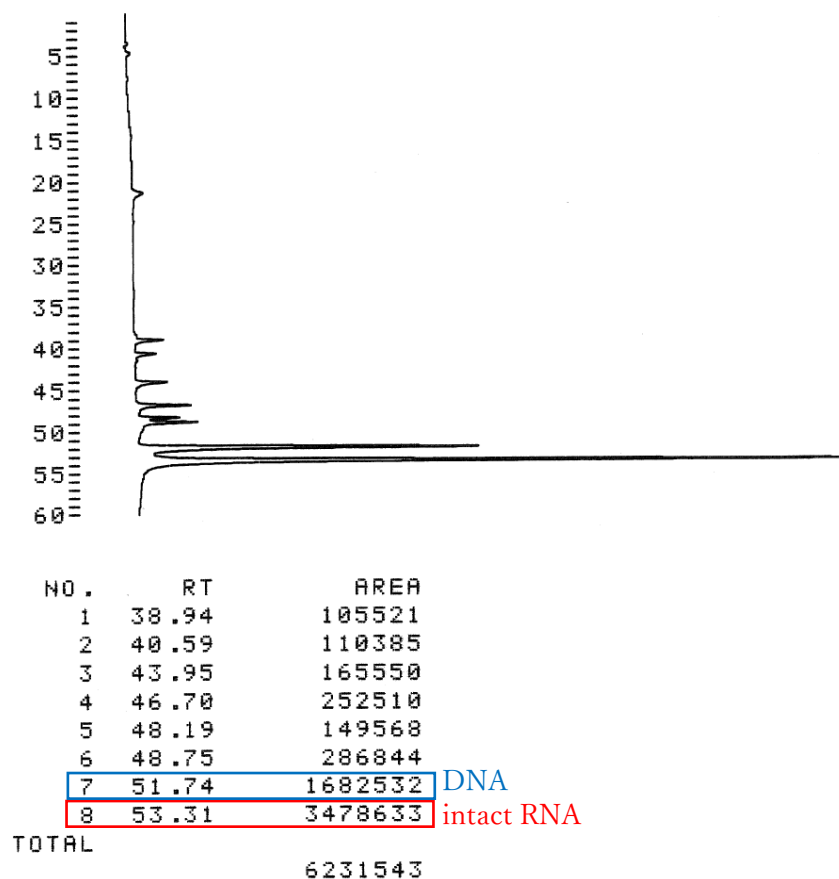

**Figure S33** RP-HPLC profile of the mixture of a 9mer DNA (D1) and a 24mer RNA (R11) in the absence of ODAGal4 after treatment with RNase H for 5 min (Figure 4). The RP-HPLC analysis (UV detection at 260 nm) was performed with a linear gradient of 0%–12% CH<sub>3</sub>CN in 0.1 M TEAA buffer (pH 7.0) at 50 °C for 60 min with a flow rate of 0.5 mL/min.

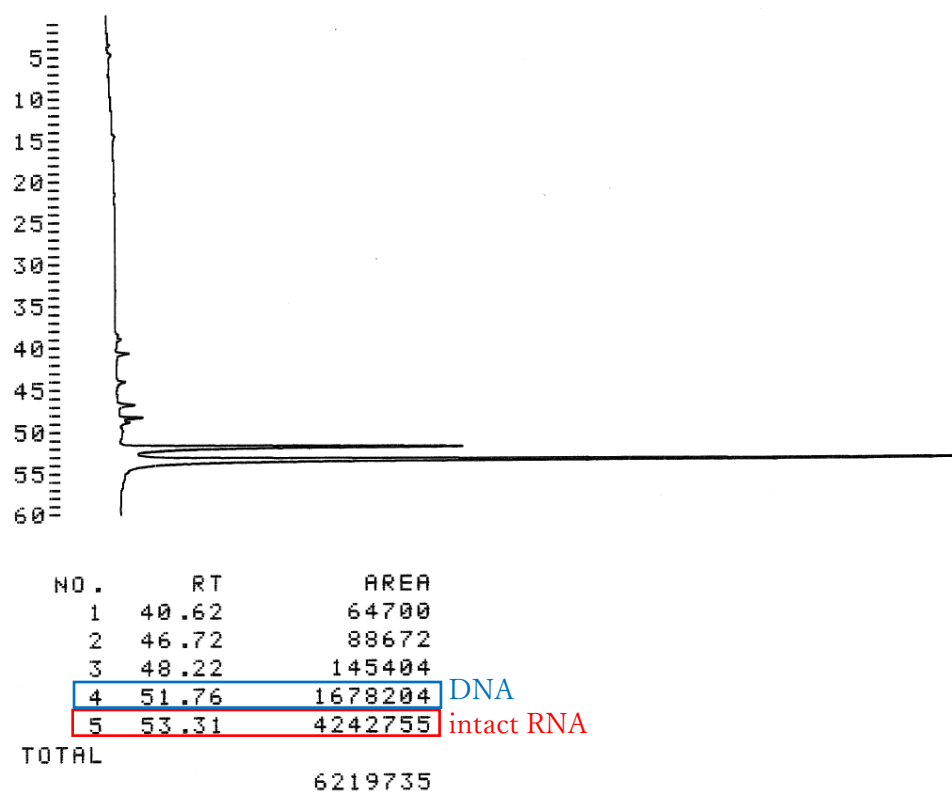

**Figure S34** RP-HPLC profile of the mixture of a 9mer DNA (D1) and a 24mer RNA (R11) in the presence of ODAGal4 after treatment with RNase H for 5 min (Figure 4). The RP-HPLC analysis (UV detection at 260 nm) was performed with a linear gradient of 0%–12% CH<sub>3</sub>CN in 0.1 M TEAA buffer (pH 7.0) at 50 °C for 60 min with a flow rate of 0.5 mL/min.

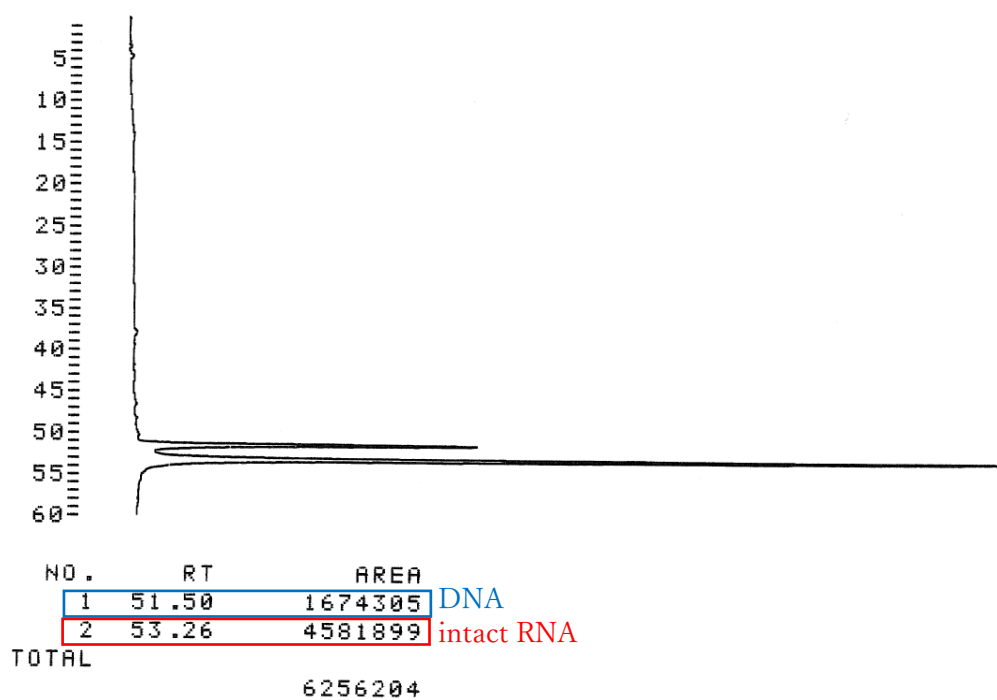

**Figure S35** RP-HPLC profile of the mixture of a 9mer DNA (D1) and 24mer RNA (R12). The RP-HPLC analysis (UV detection at 260 nm) was performed with a linear gradient of 0%–12% CH<sub>3</sub>CN in 0.1 M TEAA buffer (pH 7.0) at 50 °C for 60 min with a flow rate of 0.5 mL/min.

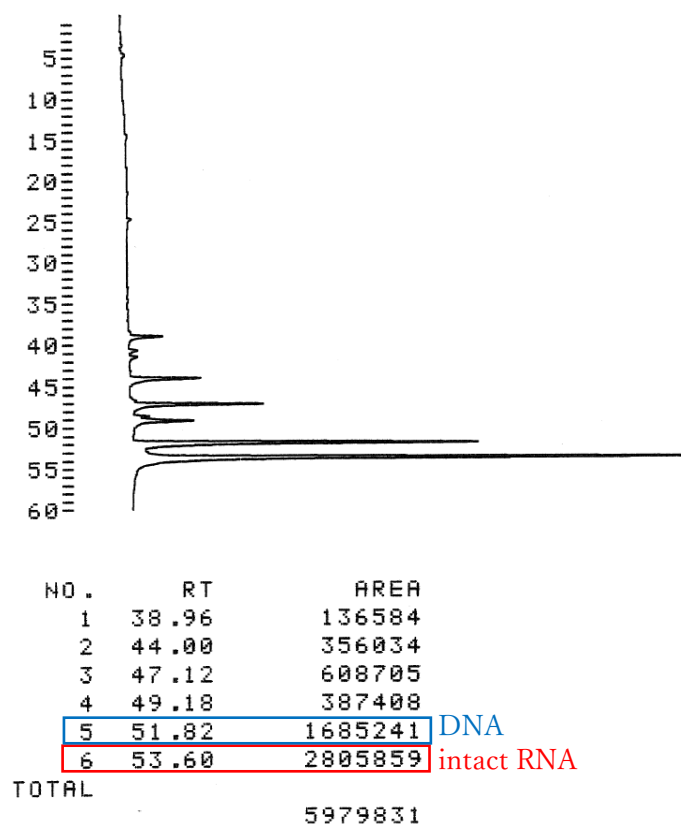

**Figure S36** RP-HPLC profile of the mixture of a 9mer DNA (D1) and 24mer RNA (R12) in the absence of ODAGal4 after treatment with RNase H for 5 min (Figure 4). The RP-HPLC analysis (UV detection at 260 nm) was performed with a linear gradient of 0%–12% CH<sub>3</sub>CN in 0.1 M TEAA buffer (pH 7.0) at 50 °C for 60 min with a flow rate of 0.5 mL/min.

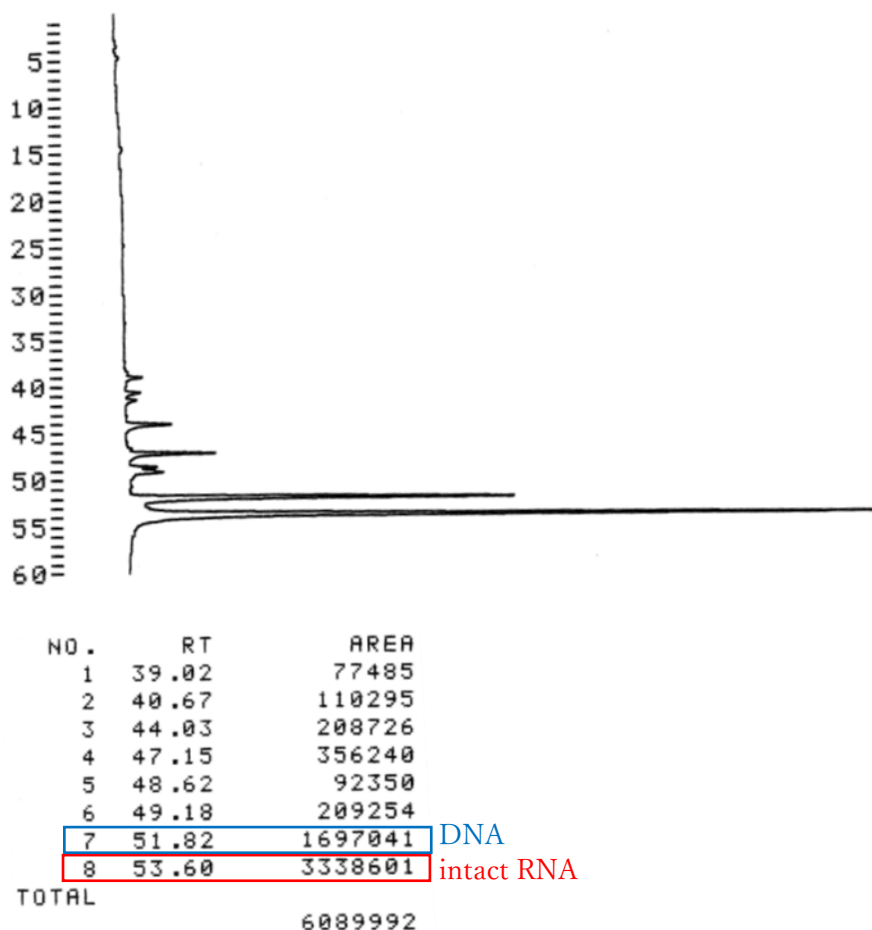

**Figure S37** RP-HPLC profile of the mixture of a 9mer DNA (D1) and a 24mer RNA (R12) in the presence of ODAGal4 after treatment with RNase H for 5 min (Figure 4). The RP-HPLC analysis (UV detection at 260 nm) was performed with a linear gradient of 0%–12% CH<sub>3</sub>CN in 0.1 M TEAA buffer (pH 7.0) at 50 °C for 60 min with a flow rate of 0.5 mL/min.

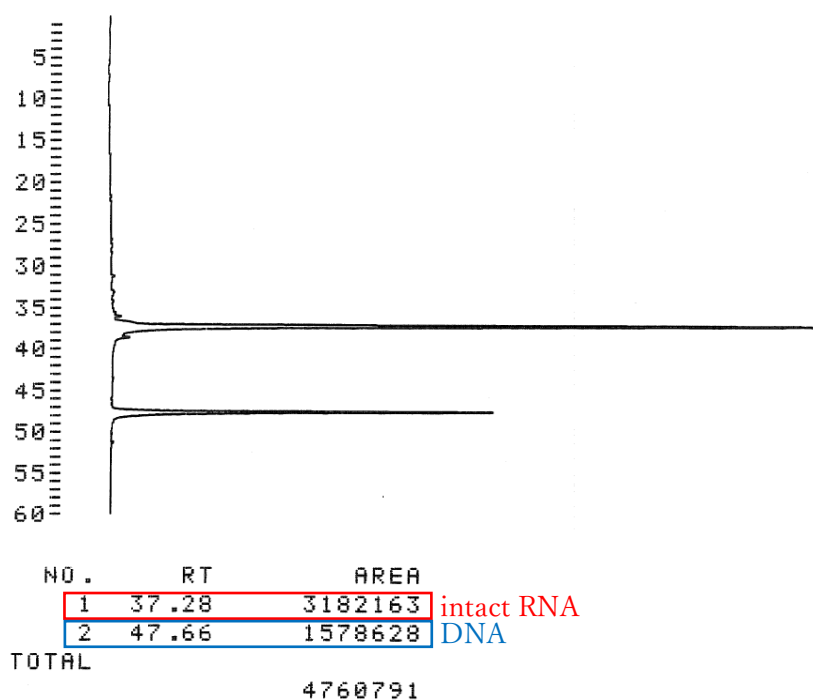

**Figure S38** RP-HPLC profile of the mixture of a 9mer DNA (D2) and a 24mer RNA (R1), which was used for the calculation of the amount of the cleaved RNA in Figure S40 and S41. The RP-HPLC analysis (UV detection at 260 nm) was performed with a linear gradient of 0%–10% CH<sub>3</sub>CN in 0.1 M AA buffer (pH 7.0) at 50 °C for 60 min with a flow rate of 0.5 mL/min.

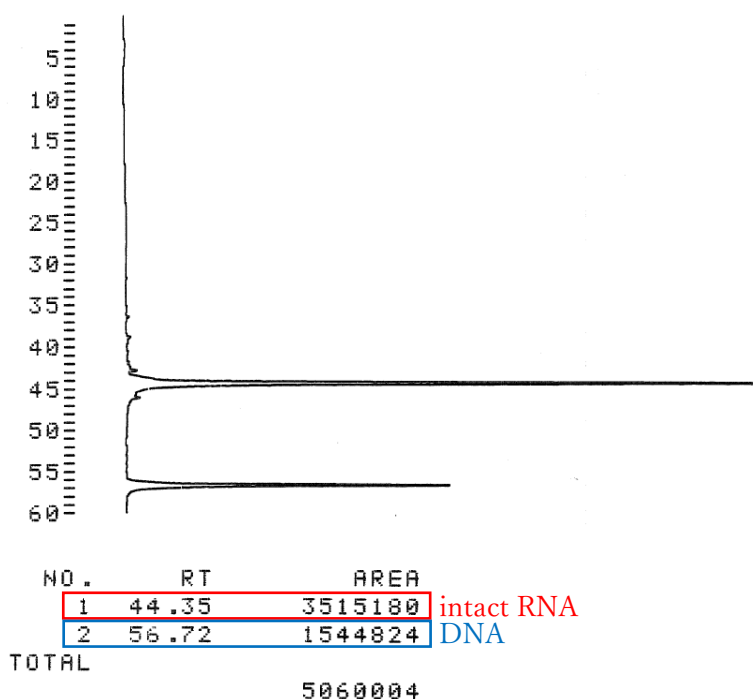

**Figure S39** RP-HPLC profile of the mixture of a 9mer DNA (D2) and a 24mer RNA (R1), which was used for the calculation of the amount of the cleaved RNA in Figure S42 and S43. The RP-HPLC analysis (UV detection at 260 nm) was performed with a linear gradient of 0%–8% CH<sub>3</sub>CN in 0.1 M AA buffer (pH 7.0) at 50 °C for 60 min with a flow rate of 0.5 mL/min.

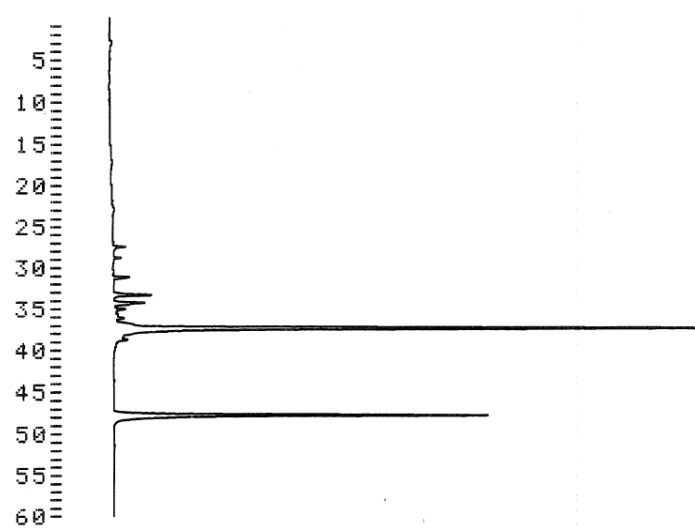

| NO.   | RT    | AREA    |
|-------|-------|---------|
| 1     | 27.43 | 46807   |
| 2     | 31.15 | 66700   |
| 3     | 33.31 | 136344  |
| 4     | 34.24 | 128440  |
| 5     | 37.31 | 2610490 |
| 6     | 47.74 | 1540830 |
| TOTAL |       | 4529611 |

intact RNA

DNA

**Figure S40** RP-HPLC profile of the mixture of a 9mer DNA (D2) and a 24mer RNA (R1) in the absence of ODAGal4 after treatment with RNase H for 5 min (Figure 5). The RP-HPLC analysis (UV detection at 260 nm) was performed with a linear gradient of 0%–10% CH<sub>3</sub>CN in 0.1 M AA buffer (pH 7.0) at 50 °C for 60 min with a flow rate of 0.5 mL/min.

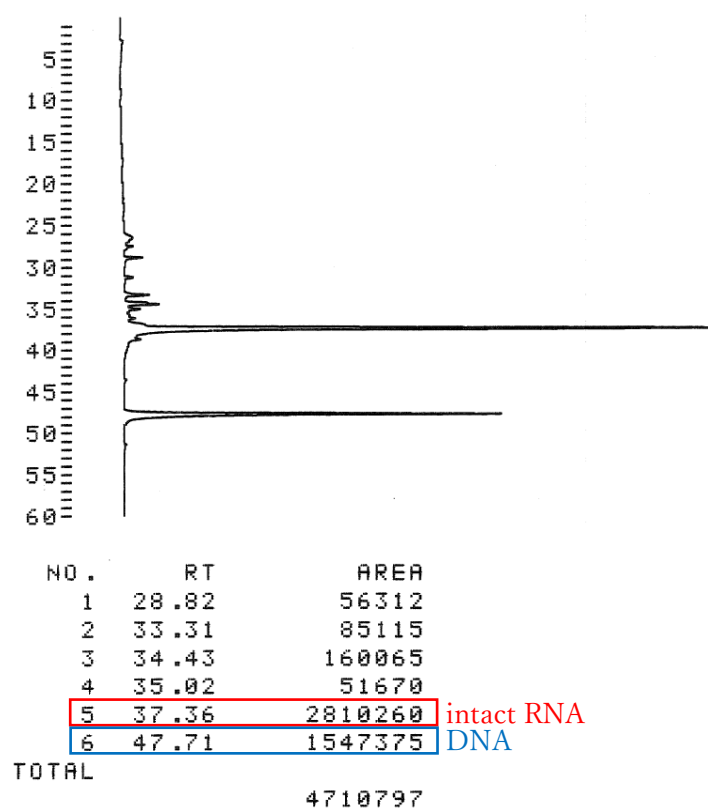

intact RNA  
DNA

**Figure S41** RP-HPLC profile of the mixture of a 9mer DNA (D2) and a 24mer RNA (R1) in the presence of ODAGal4 after treatment with RNase H for 5 min (Figure 5). The RP-HPLC analysis (UV detection at 260 nm) was performed with a linear gradient of 0%–10% CH<sub>3</sub>CN in 0.1 M AA buffer (pH 7.0) at 50 °C for 60 min with a flow rate of 0.5 mL/min.

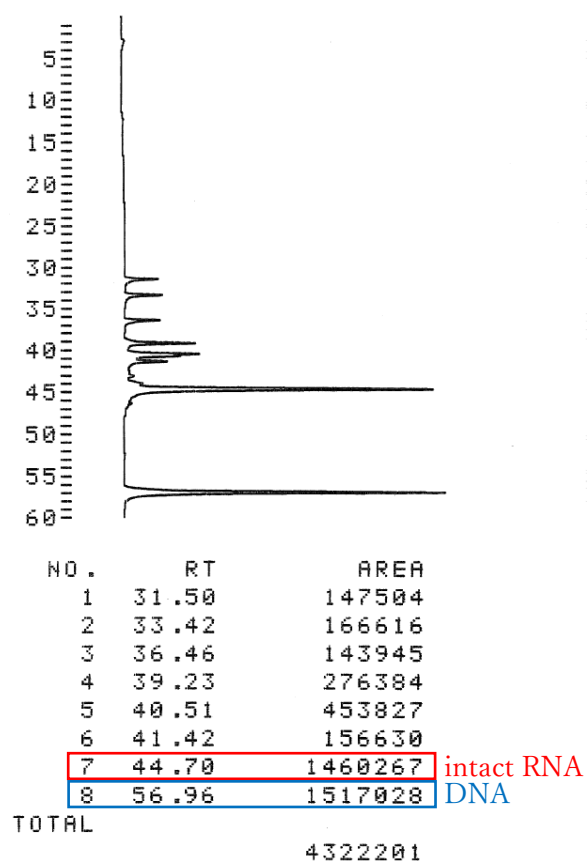

**Figure S42** RP-HPLC profile of the mixture of a 9mer DNA (D2) and a 24mer RNA (R1) in the absence of ODAGal4 after treatment with RNase H for 1 h (Figure 5). The RP-HPLC analysis (UV detection at 260 nm) was performed with a linear gradient of 0%–8% CH<sub>3</sub>CN in 0.1 M AA buffer (pH 7.0) at 50 °C for 60 min with a flow rate of 0.5 mL/min.

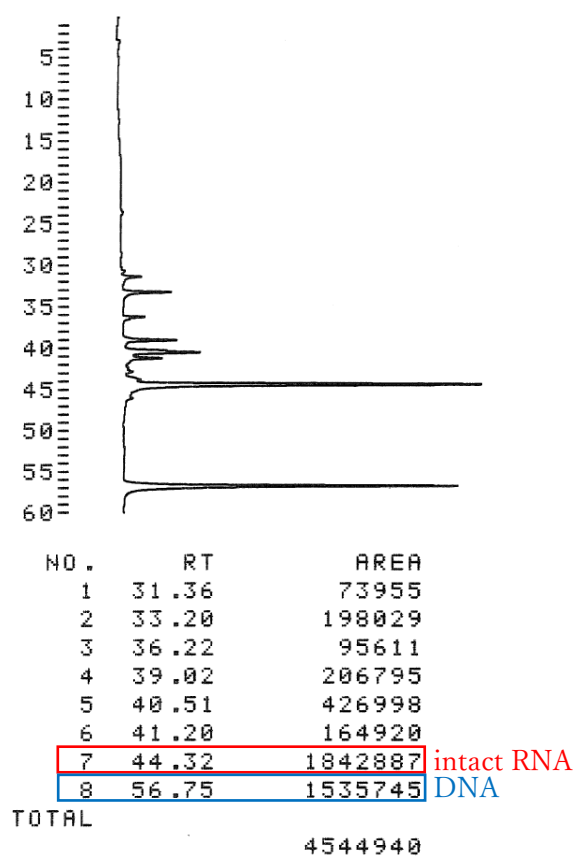

**Figure S43** RP-HPLC profile of the mixture of a 9mer DNA (D2) and a 24mer RNA (R1) in the presence of ODAGal4 after treatment with RNase H for 1 h (Figure 5). The RP-HPLC analysis (UV detection at 260 nm) was performed with a linear gradient of 0%–8% CH<sub>3</sub>CN in 0.1 M AA buffer (pH 7.0) at 50 °C for 60 min with a flow rate of 0.5 mL/min.

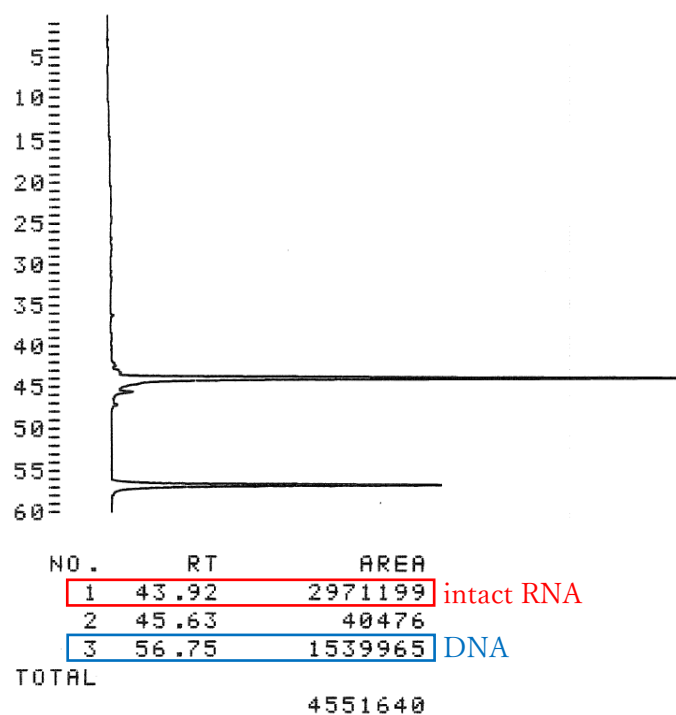

**Figure S44** RP-HPLC profile of the mixture of a 9mer DNA (D2) and a 24mer RNA (R3) in the presence of ODAGal4 after treatment with RNase H for 1 h (Figure 5). The RP-HPLC analysis (UV detection at 260 nm) was performed with a linear gradient of 0%–8% CH<sub>3</sub>CN in 0.1 M AA buffer (pH 7.0) at 50 °C for 60 min with a flow rate of 0.5 mL/min.

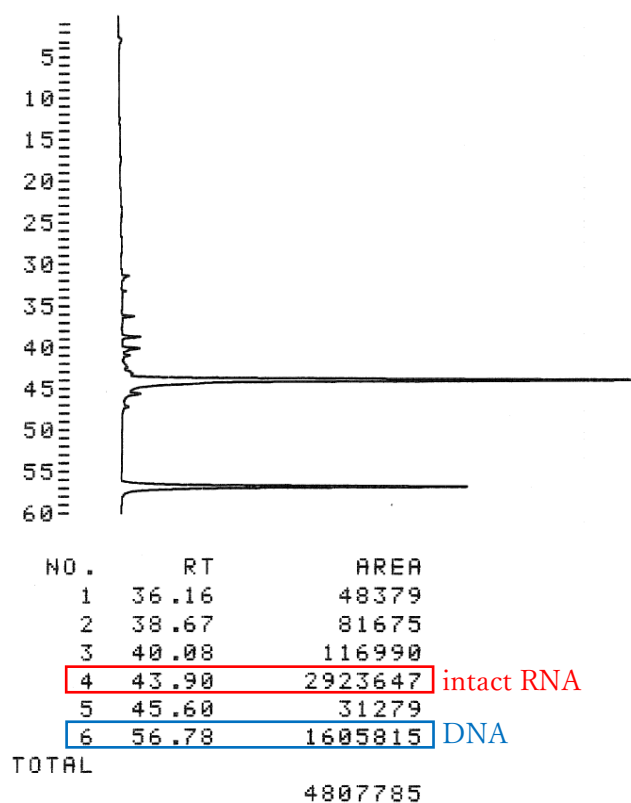

**Figure S45** RP-HPLC profile of the mixture of a 9mer DNA (D2) and a 24mer RNA (R3) in the absence of ODAGal4 after treatment with RNase H for 1 h (Figure 5). The RP-HPLC analysis (UV detection at 260 nm) was performed with a linear gradient of 0%–8% CH<sub>3</sub>CN in 0.1 M AA buffer (pH 7.0) at 50 °C for 60 min with a flow rate of 0.5 mL/min.

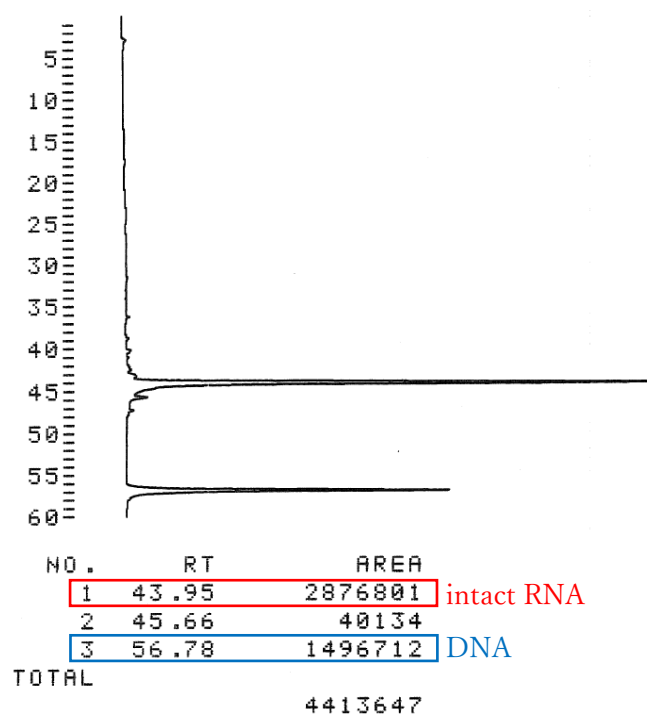

intact RNA

DNA

**Figure S46** RP-HPLC profile of the mixture of a 9mer DNA (D2) and a 24mer RNA (R3) in the presence of ODAGal4 after treatment with RNase H for 1 h (Figure 5). The RP-HPLC analysis (UV detection at 260 nm) was performed with a linear gradient of 0%–8% CH<sub>3</sub>CN in 0.1 M AA buffer (pH 7.0) at 50 °C for 60 min with a flow rate of 0.5 mL/min.

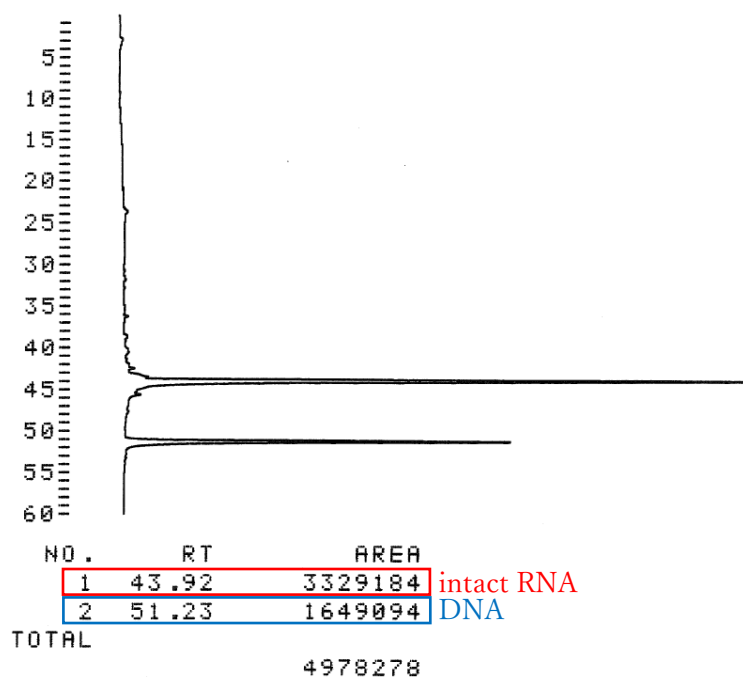

**Figure S47** RP-HPLC profile of the mixture of a 9mer DNA (D3) and a 24mer RNA (R1). The RP-HPLC analysis (UV detection at 260 nm) was performed with a linear gradient of 0%–8% CH<sub>3</sub>CN in 0.1 M AA buffer (pH 7.0) at 50 °C for 60 min with a flow rate of 0.5 mL/min.

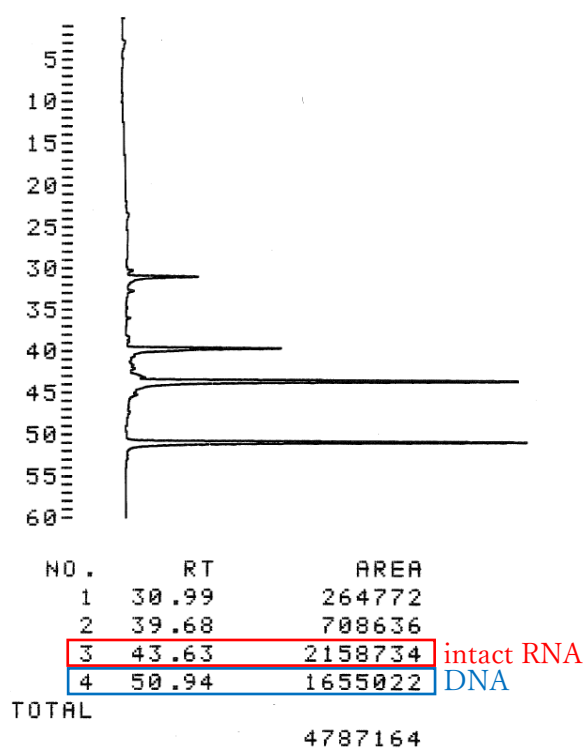

**Figure S48** RP-HPLC profile of the mixture of a 9mer DNA (D3) and a 24mer RNA (R1) in the absence of ODAGal4 after treatment with RNase H for 2 min (Figure 5). The RP-HPLC analysis (UV detection at 260 nm) was performed with a linear gradient of 0%–8% CH<sub>3</sub>CN in 0.1 M AA buffer (pH 7.0) at 50 °C for 60 min with a flow rate of 0.5 mL/min.

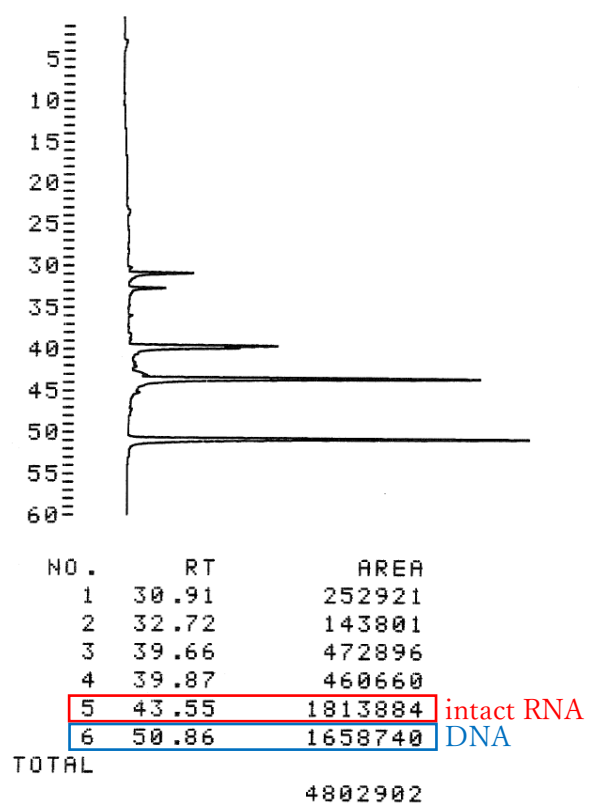

**Figure S49** RP-HPLC profile of the mixture of a 9mer DNA (D3) and a 24mer RNA (R1) in the presence of ODAGal4 after treatment with RNase H for 2 min (Figure 5). The RP-HPLC analysis (UV detection at 260 nm) was performed with a linear gradient of 0%–8% CH<sub>3</sub>CN in 0.1 M AA buffer (pH 7.0) at 50 °C for 60 min with a flow rate of 0.5 mL/min.

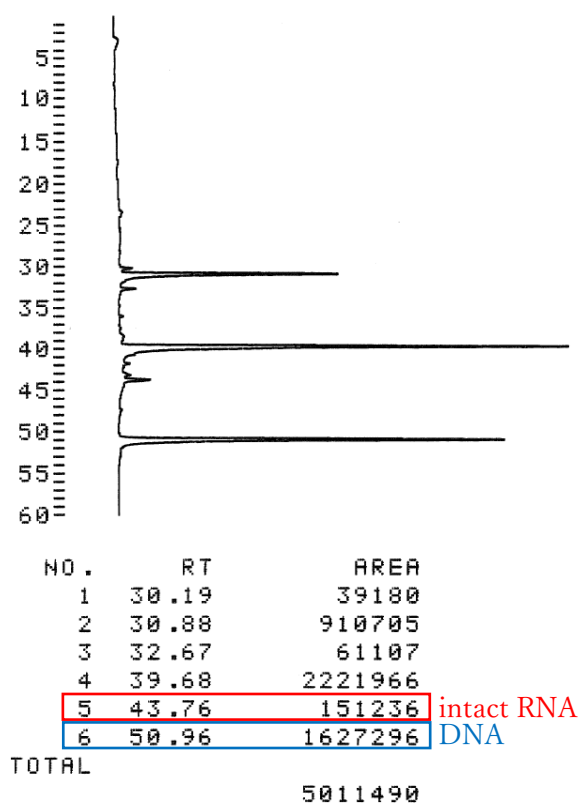

**Figure S50** RP-HPLC profile of the mixture of a 9mer DNA (D3) and a 24mer RNA (R1) in the absence of ODAGal4 after treatment with RNase H for 5 min (Figure 5). The RP-HPLC analysis (UV detection at 260 nm) was performed with a linear gradient of 0%–8% CH<sub>3</sub>CN in 0.1 M AA buffer (pH 7.0) at 50 °C for 60 min with a flow rate of 0.5 mL/min. The peak at 40 min is the intact RNA and the peak at 51 min is the DNA.

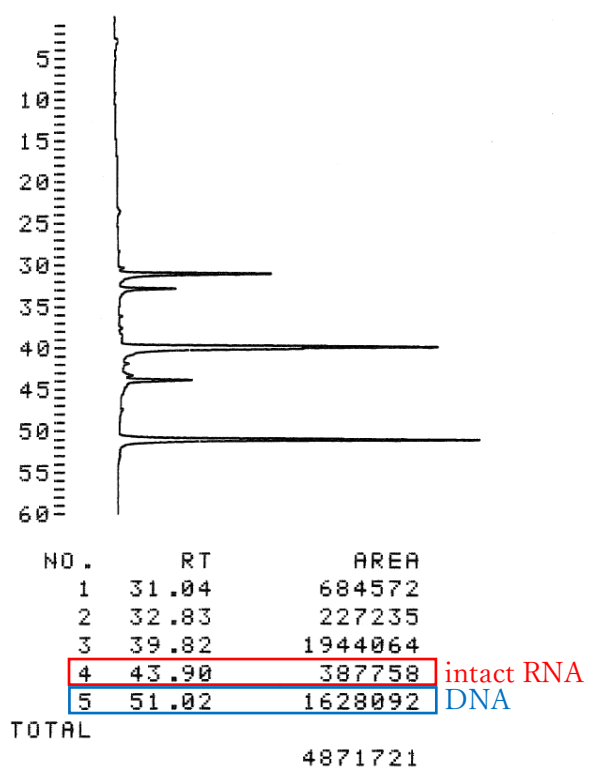

**Figure S51** RP-HPLC profile of the mixture of a 9mer DNA (D3) and a 24mer RNA (R1) in the presence of ODAGal4 after treatment with RNase H for 5 min (Figure 5). The RP-HPLC analysis (UV detection at 260 nm) was performed with a linear gradient of 0%–8% CH<sub>3</sub>CN in 0.1 M AA buffer (pH 7.0) at 50 °C for 60 min with a flow rate of 0.5 mL/min.

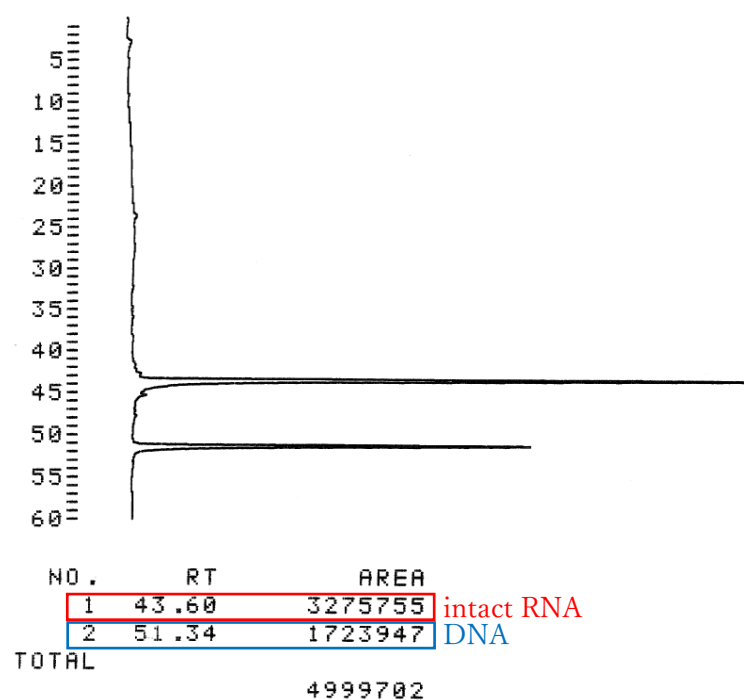

**Figure S52** RP-HPLC profile of the mixture of a 9mer DNA (D3) and a 24mer RNA (R4). The RP-HPLC analysis (UV detection at 260 nm) was performed with a linear gradient of 0%–8% CH<sub>3</sub>CN in 0.1 M AA buffer (pH 7.0) at 50 °C for 60 min with a flow rate of 0.5 mL/min.

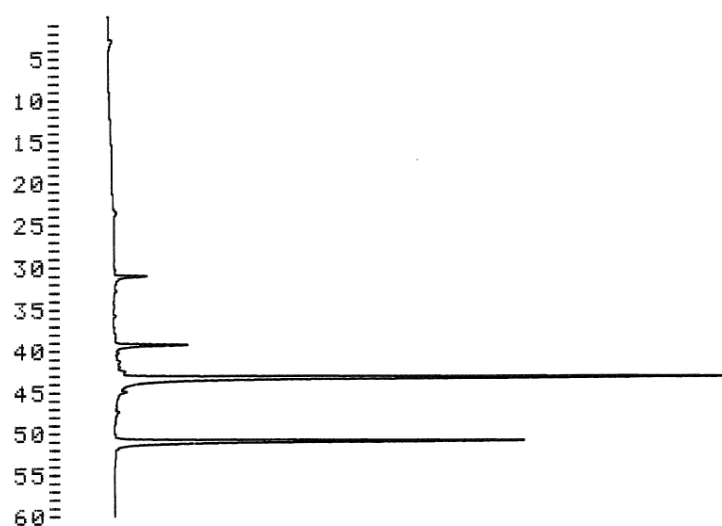

| NO.   | RT    | AREA    |
|-------|-------|---------|
| 1     | 30.99 | 125382  |
| 2     | 39.26 | 303852  |
| 3     | 43.23 | 2912356 |
| 4     | 50.94 | 1743993 |
| TOTAL |       | 5085583 |

intact RNA

DNA

**Figure S53** RP-HPLC profile of the mixture of a 9mer DNA (D3) and a 24mer RNA (R4) in the absence of ODAGal4 after treatment with RNase H for 2 min (Figure 5). The RP-HPLC analysis (UV detection at 260 nm) was performed with a linear gradient of 0%–8% CH<sub>3</sub>CN in 0.1 M AA buffer (pH 7.0) at 50 °C for 60 min with a flow rate of 0.5 mL/min.

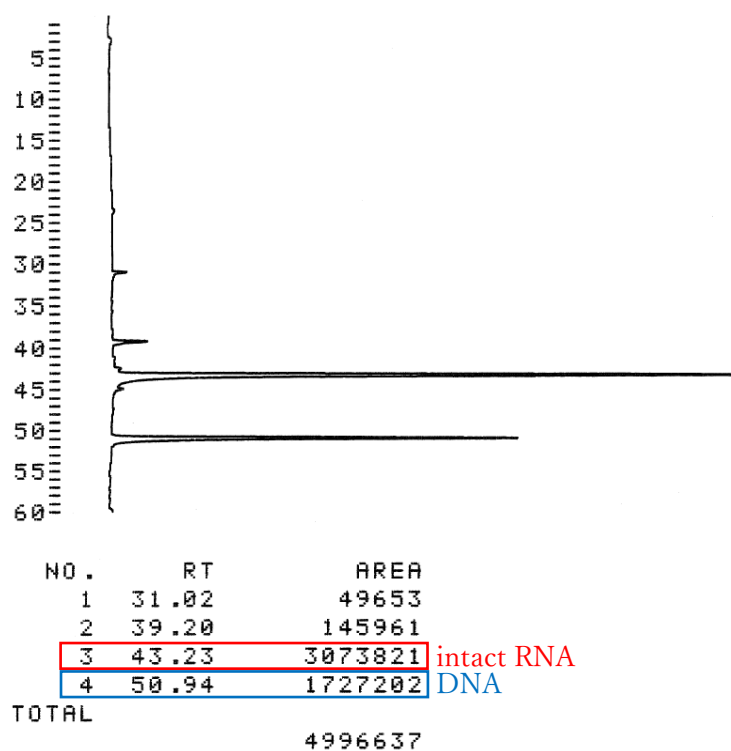

**Figure S54** RP-HPLC profile of the mixture of a 9mer DNA (D3) and a 24mer RNA (R4) in the presence of ODAGal4 after treatment with RNase H for 2 min (Figure 5). The RP-HPLC analysis (UV detection at 260 nm) was performed with a linear gradient of 0%–8% CH<sub>3</sub>CN in 0.1 M AA buffer (pH 7.0) at 50 °C for 60 min with a flow rate of 0.5 mL/min.

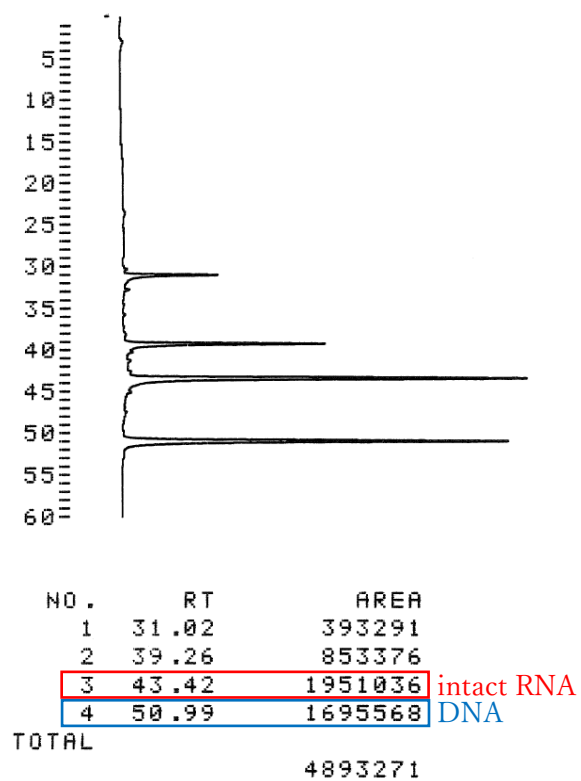

**Figure S55** RP-HPLC profile of the mixture of a 9mer DNA (D3) and a 24mer RNA (R4) in the absence of ODAGal4 after treatment with RNase H for 5 min (Figure 5). The RP-HPLC analysis (UV detection at 260 nm) was performed with a linear gradient of 0%–8% CH<sub>3</sub>CN in 0.1 M AA buffer (pH 7.0) at 50 °C for 60 min with a flow rate of 0.5 mL/min.

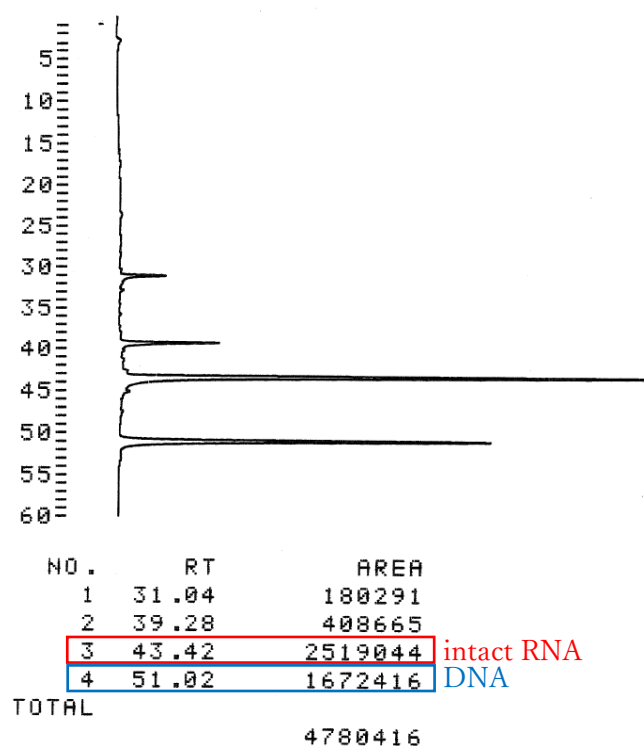

intact RNA  
DNA

**Figure S56** RP-HPLC profile of the mixture of a 9mer DNA (D3) and a 24mer RNA (R4) in the presence of ODAGal4 after treatment with RNase H for 5 min (Figure 5). The RP-HPLC analysis (UV detection at 260 nm) was performed with a linear gradient of 0%–8% CH<sub>3</sub>CN in 0.1 M AA buffer (pH 7.0) at 50 °C for 60 min with a flow rate of 0.5 mL/min.

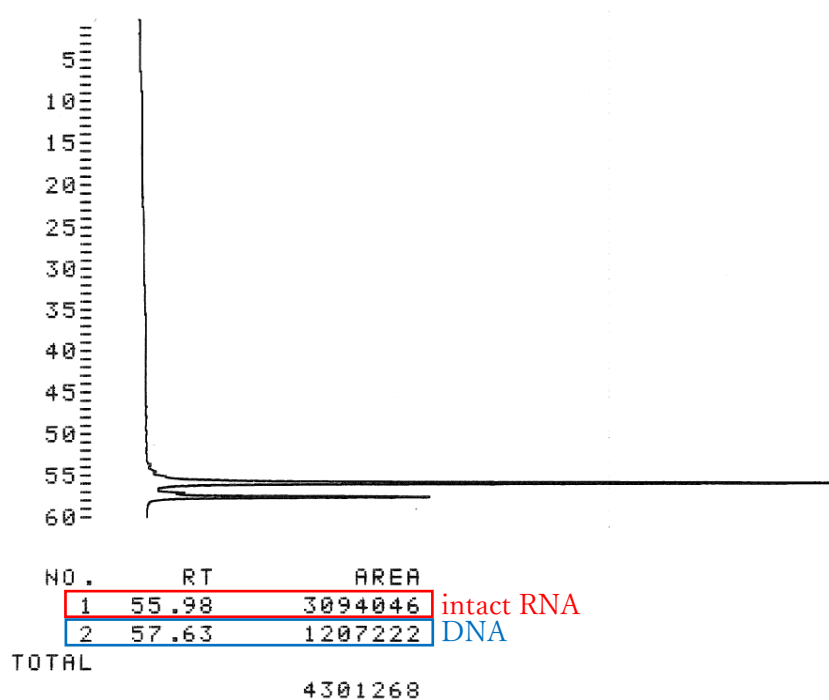

**Figure S57** RP-HPLC profile of the mixture of a 9mer DNA (D4) and a 27mer RNA (R13). The RP-HPLC analysis (UV detection at 260 nm) was performed with a linear gradient of 0%–10% CH<sub>3</sub>CN in 0.1 M TEAA buffer (pH 7.0) at 50 °C for 60 min with a flow rate of 1.0 mL/min.

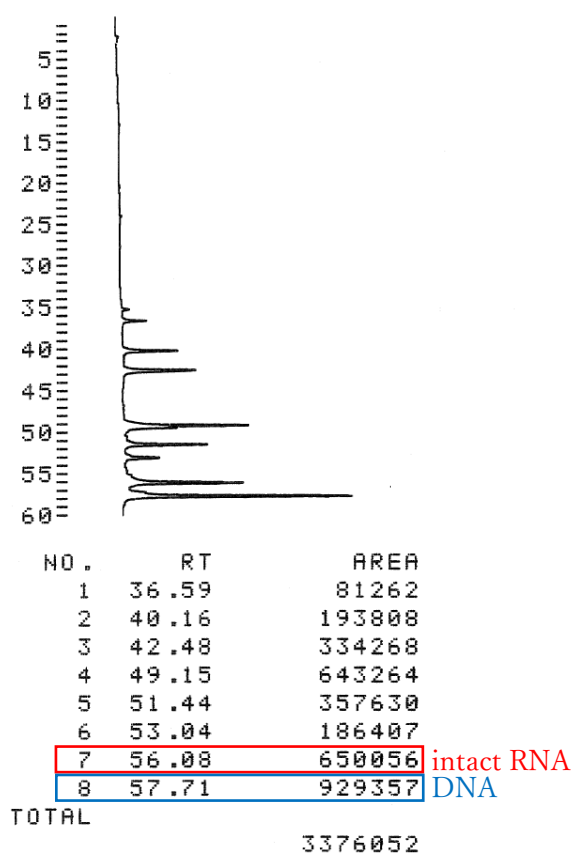

**Figure S58** RP-HPLC profile of the mixture of a 9mer DNA (D4) and a 27mer RNA (R13) in the absence of ODAGal4 after treatment with RNase H for 1 h (Figure 6). The RP-HPLC analysis (UV detection at 260 nm) was performed with a linear gradient of 0%–10% CH<sub>3</sub>CN in 0.1 M TEAA buffer (pH 7.0) at 50 °C for 60 min with a flow rate of 1.0 mL/min.

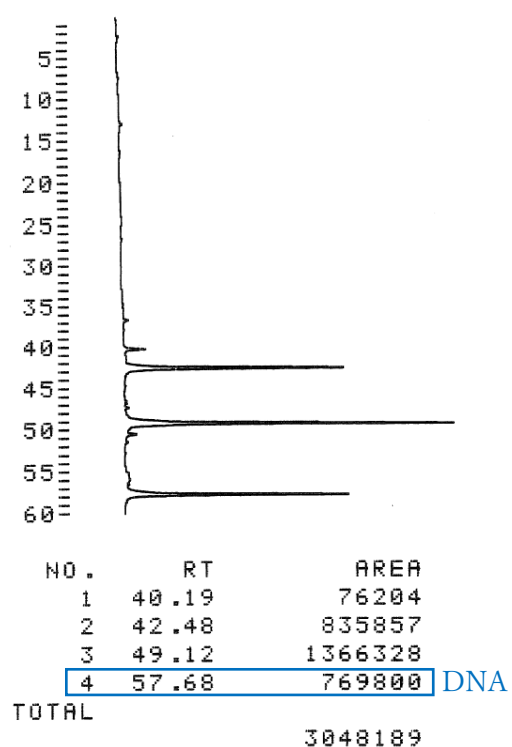

**Figure S59** RP-HPLC profile of the mixture of a 9mer DNA (D4) and a 27mer RNA (R13) in the presence of ODAGal4 after treatment with RNase H for 1 h (Figure 6). The RP-HPLC analysis (UV detection at 260 nm) was performed with a linear gradient of 0%–10% CH<sub>3</sub>CN in 0.1 M TEAA buffer (pH 7.0) at 50 °C for 60 min with a flow rate of 1.0 mL/min.

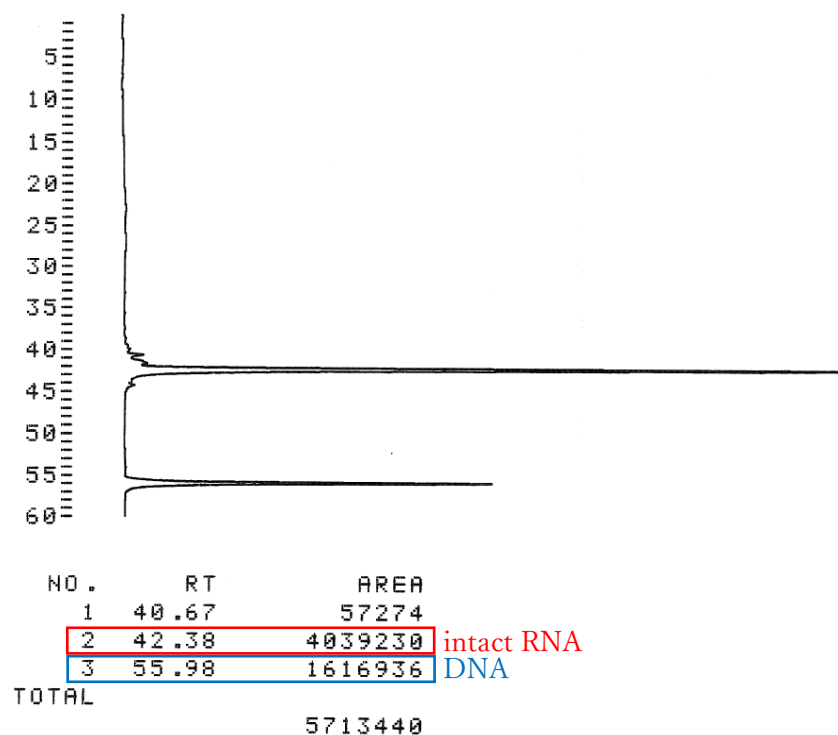

**Figure S60** RP-HPLC profile of the mixture of a 9mer DNA (D4) and a 27mer RNA (R14). The RP-HPLC analysis (UV detection at 260 nm) was performed with a linear gradient of 0%–9% CH<sub>3</sub>CN in 0.1 M AA buffer (pH 7.0) at 50 °C for 60 min with a flow rate of 0.5 mL/min.

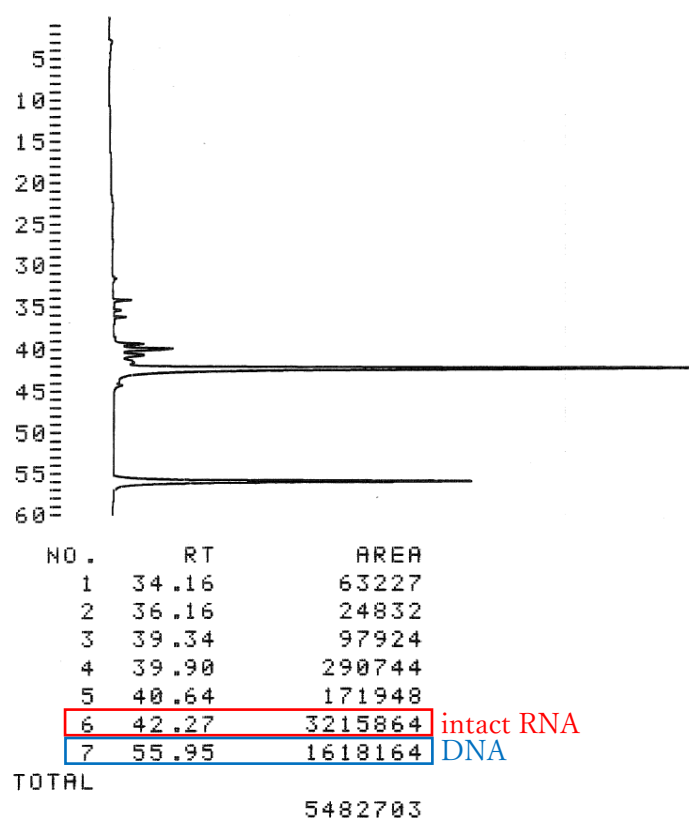

**Figure S61** RP-HPLC profile of the mixture of a 9mer DNA (D4) and a 27mer RNA (R14) in the absence of ODAGal4 after treatment with RNase H for 1 h (Figure 6). The RP-HPLC analysis (UV detection at 260 nm) was performed with a linear gradient of 0%–9% CH<sub>3</sub>CN in 0.1 M AA buffer (pH 7.0) at 50 °C for 60 min with a flow rate of 0.5 mL/min.

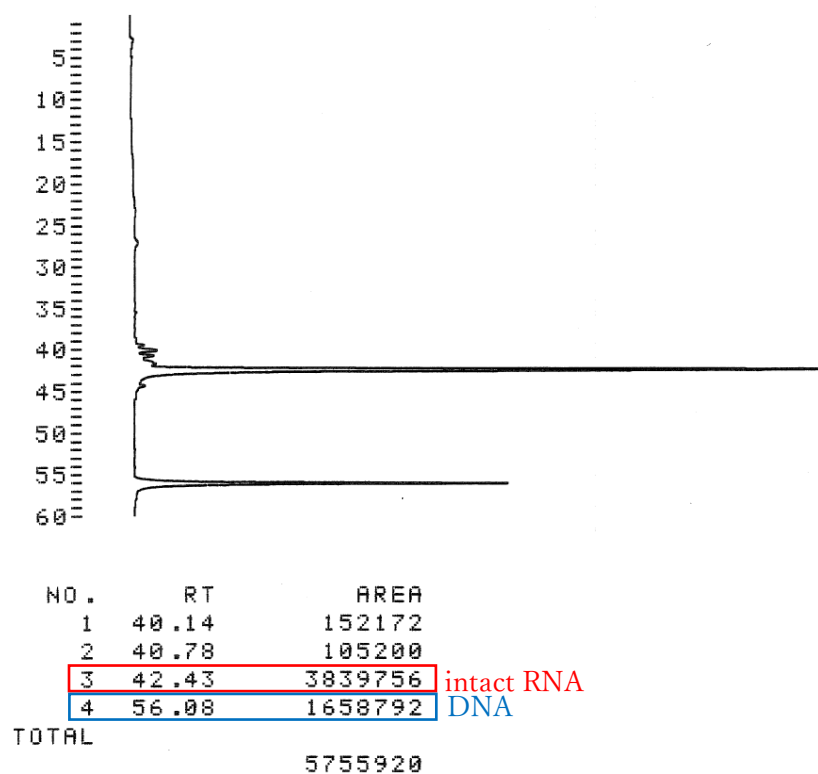

**Figure S62** RP-HPLC profile of the mixture of a 9mer DNA (D4) and a 27mer RNA (R14) in the presence of ODAGal4 after treatment with RNase H for 1 h (Figure 6). The RP-HPLC analysis (UV detection at 260 nm) was performed with a linear gradient of 0%–9% CH<sub>3</sub>CN in 0.1 M AA buffer (pH 7.0) at 50 °C for 60 min with a flow rate of 0.5 mL/min.

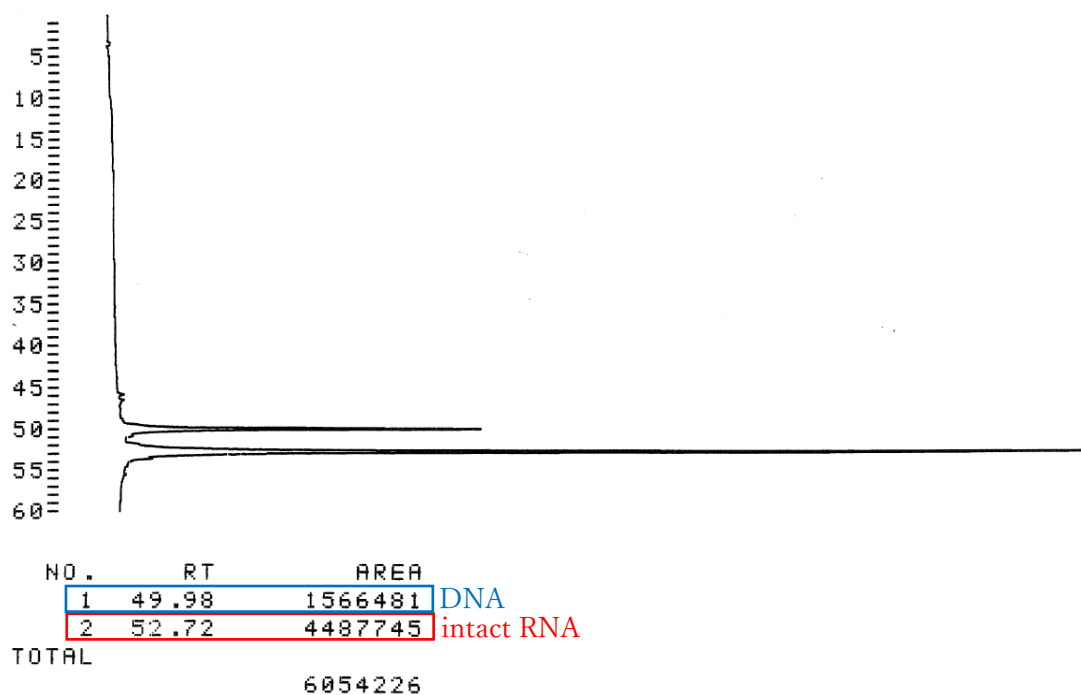

**Figure S63** RP-HPLC profile of the mixture of an 8mer DNA (D5) and a 24mer RNA (R1). The RP-HPLC analysis (UV detection at 260 nm) was performed with a linear gradient of 0%–12% CH<sub>3</sub>CN in 0.1 M TEAA buffer (pH 7.0) at 50 °C for 60 min with a flow rate of 0.5 mL/min.

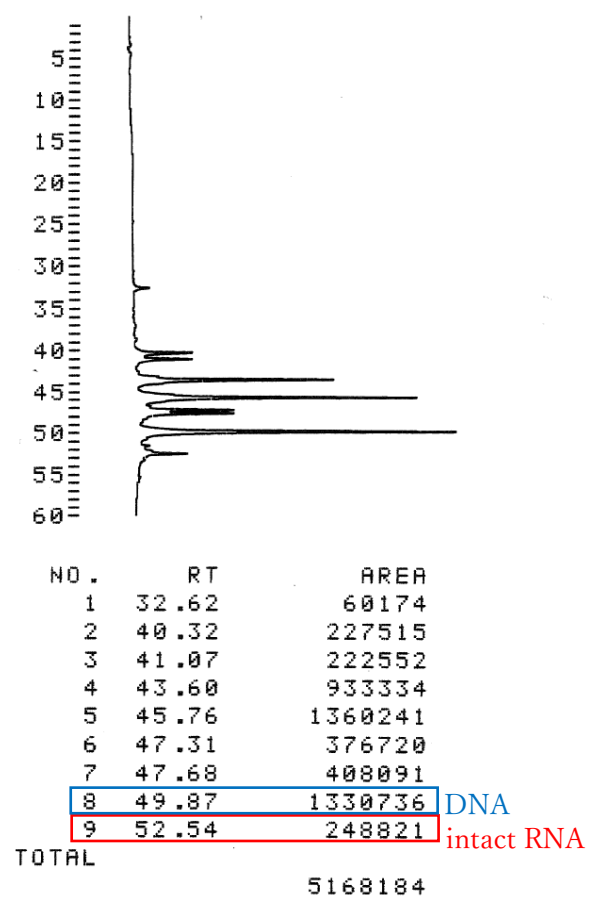

**Figure S64** RP-HPLC profile of the mixture of an 8mer DNA (D5) and a 24mer RNA (R1) in the absence of ODAGal4 after treatment with RNase H for 5 min (Figure 7). The RP-HPLC analysis (UV detection at 260 nm) was performed with a linear gradient of 0%–12% CH<sub>3</sub>CN in 0.1 M TEAA buffer (pH 7.0) at 50 °C for 60 min with a flow rate of 0.5 mL/min.

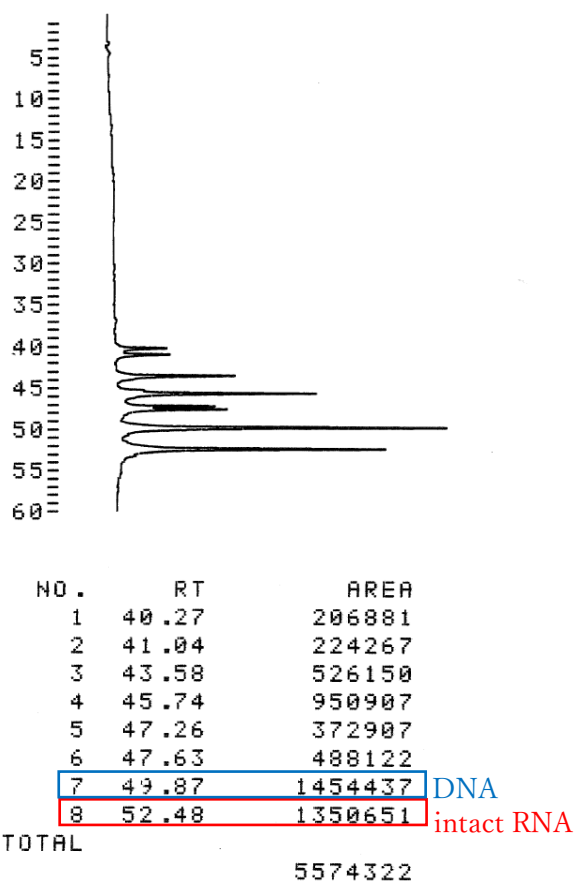

**Figure S65** RP-HPLC profile of the mixture of an 8mer DNA (D5) and a 24mer RNA (R1) in the presence of ODAGal4 after treatment with RNase H for 5 min (Figure 7). The RP-HPLC analysis (UV detection at 260 nm) was performed with a linear gradient of 0%–12% CH<sub>3</sub>CN in 0.1 M TEAA buffer (pH 7.0) at 50 °C for 60 min with a flow rate of 0.5 mL/min.

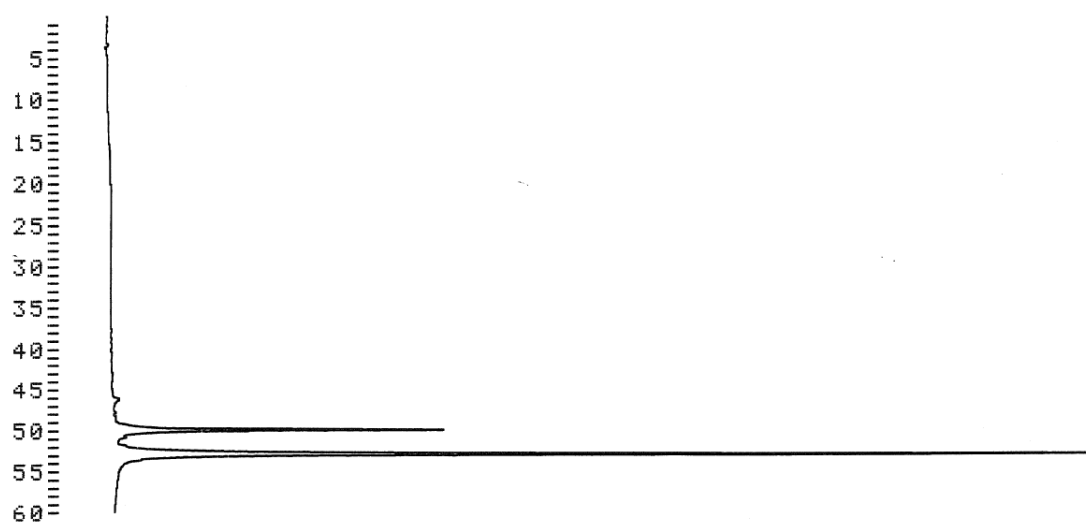

| NO.   | RT    | AREA    |            |
|-------|-------|---------|------------|
| 1     | 49.87 | 1464523 | DNA        |
| 2     | 52.78 | 4452042 | intact RNA |
| TOTAL |       | 5916565 |            |

**Figure S66** RP-HPLC profile of the mixture of an 8mer DNA (D5) and a 24mer RNA (R2). The RP-HPLC analysis (UV detection at 260 nm) was performed with a linear gradient of 0%–12% CH<sub>3</sub>CN in 0.1 M TEAA buffer (pH 7.0) at 50 °C for 60 min with a flow rate of 0.5 mL/min.

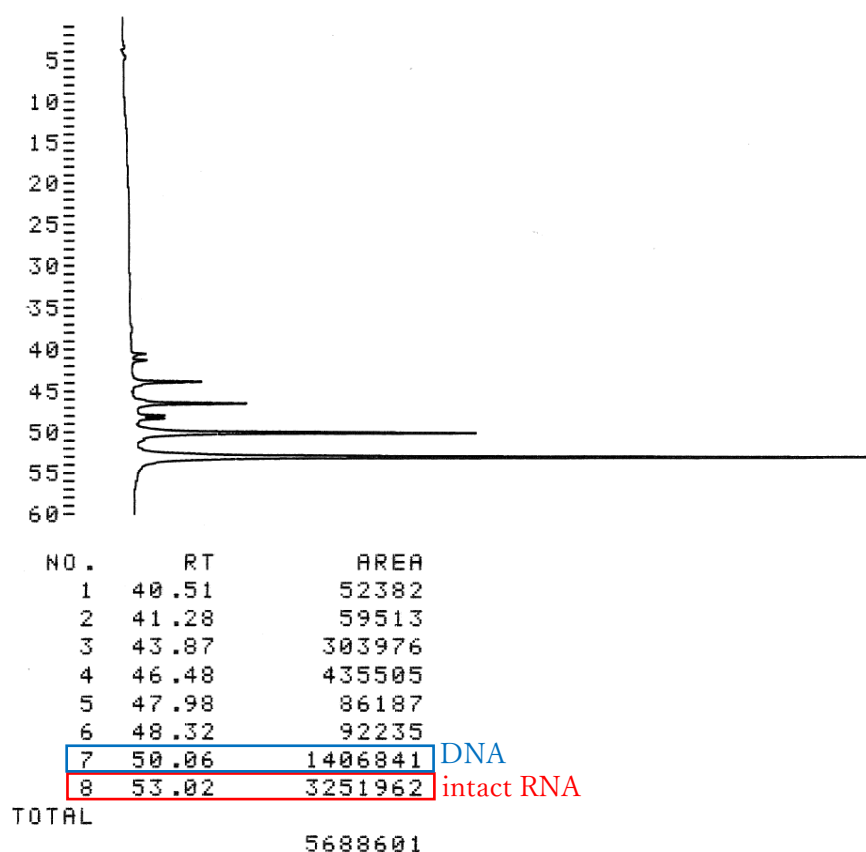

**Figure S67** RP-HPLC profile of the mixture of an 8mer DNA (D5) and a 24mer RNA (R2) in the absence of ODAGal4 after treatment with RNase H for 5 min (Figure 7). The RP-HPLC analysis (UV detection at 260 nm) was performed with a linear gradient of 0%–12% CH<sub>3</sub>CN in 0.1 M TEAA buffer (pH 7.0) at 50 °C for 60 min with a flow rate of 0.5 mL/min.

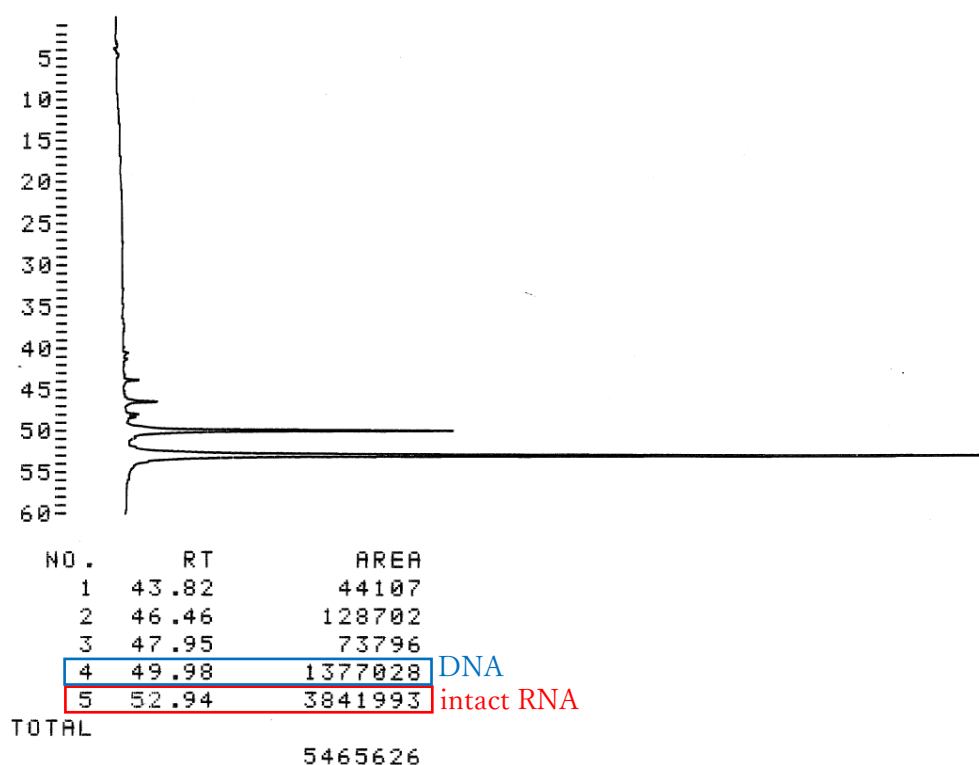

**Figure S68** RP-HPLC profile of the mixture of an 8mer DNA (D5) and a 24mer RNA (R2) in the presence of ODAGal4 after treatment with RNase H for 5 min (Figure 7). The RP-HPLC analysis (UV detection at 260 nm) was performed with a linear gradient of 0%–12% CH<sub>3</sub>CN in 0.1 M TEAA buffer (pH 7.0) at 50 °C for 60 min with a flow rate of 0.5 mL/min.

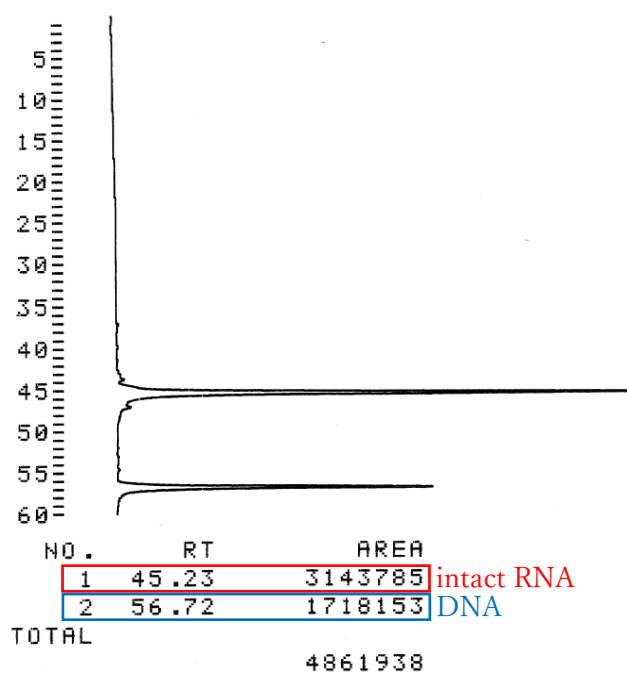

**Figure S69** RP-HPLC profile of the mixture of a 10mer DNA (D6) and a 24mer RNA (R1). The RP-HPLC analysis (UV detection at 260 nm) was performed with a linear gradient of 0%–8% CH<sub>3</sub>CN in 0.1 M AA buffer (pH 7.0) at 50 °C for 60 min with a flow rate of 0.5 mL/min.

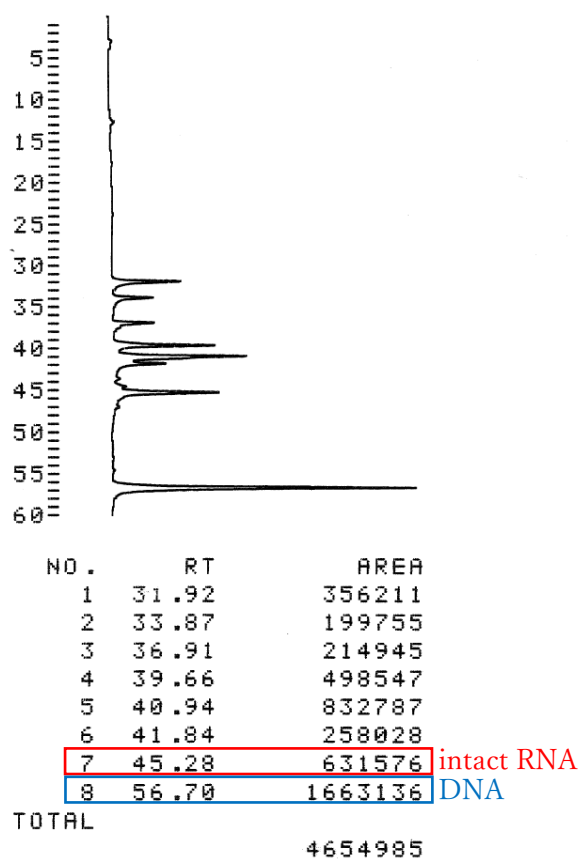

**Figure S70** RP-HPLC profile of the mixture of a 10mer DNA (D6) and a 24mer RNA (R1) in the absence of ODAGal4 after treatment with RNase H for 5 min (Figure 7). The RP-HPLC analysis (UV detection at 260 nm) was performed with a linear gradient of 0%–8% CH<sub>3</sub>CN in 0.1 M AA buffer (pH 7.0) at 50 °C for 60 min with a flow rate of 0.5 mL/min. The peak at 46 min is the intact RNA and the peak at 57 min is the DNA.

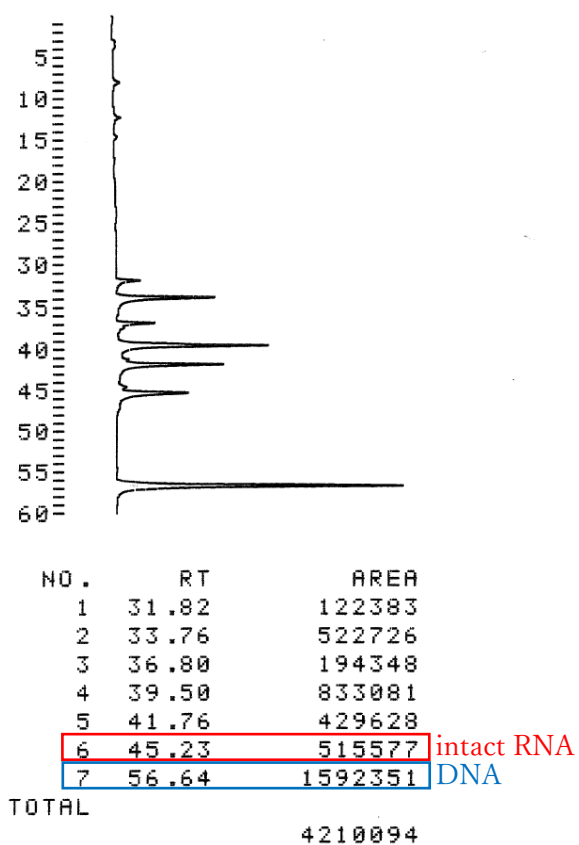

**Figure S71** RP-HPLC profile of the mixture of a 10mer DNA (D6) and a 24mer RNA (R1) in the presence of ODAGal4 after treatment with RNase H for 5 min (Figure 7). The RP-HPLC analysis (UV detection at 260 nm) was performed with a linear gradient of 0%–8% CH<sub>3</sub>CN in 0.1 M AA buffer (pH 7.0) at 50 °C for 60 min with a flow rate of 0.5 mL/min.

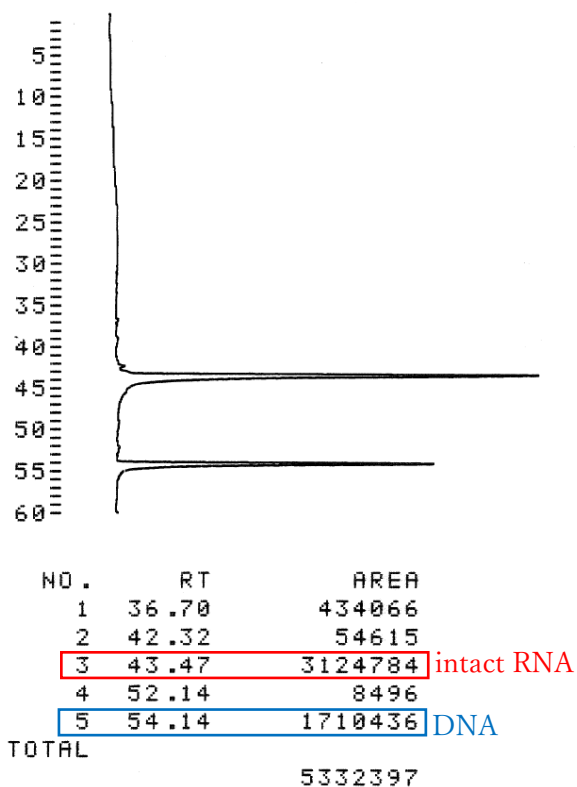

**Figure S72** RP-HPLC profile of the mixture of a 10mer DNA (D6) and a 24mer RNA (R2). The RP-HPLC analysis (UV detection at 260 nm) was performed with a linear gradient of 0%–8% CH<sub>3</sub>CN in 0.1 M AA buffer (pH 7.0) at 50 °C for 60 min with a flow rate of 0.5 mL/min.

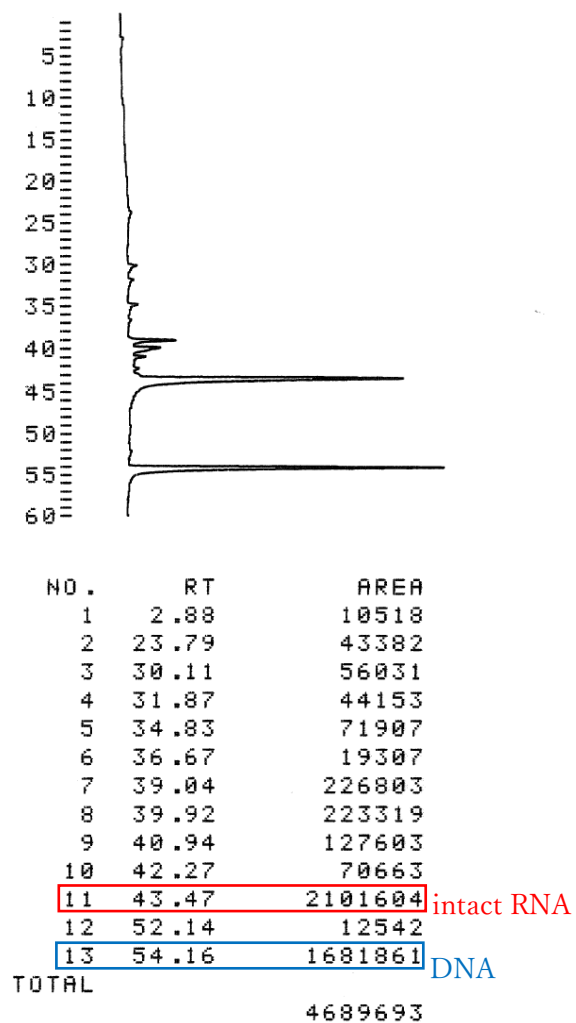

**Figure S73** RP-HPLC profile of the mixture of a 10mer DNA (D6) and a 24mer RNA (R2) in the absence of ODAGal4 after treatment with RNase H for 5 min (Figure 7). The RP-HPLC analysis (UV detection at 260 nm) was performed with a linear gradient of 0%–8% CH<sub>3</sub>CN in 0.1 M AA buffer (pH 7.0) at 50 °C for 60 min with a flow rate of 0.5 mL/min.

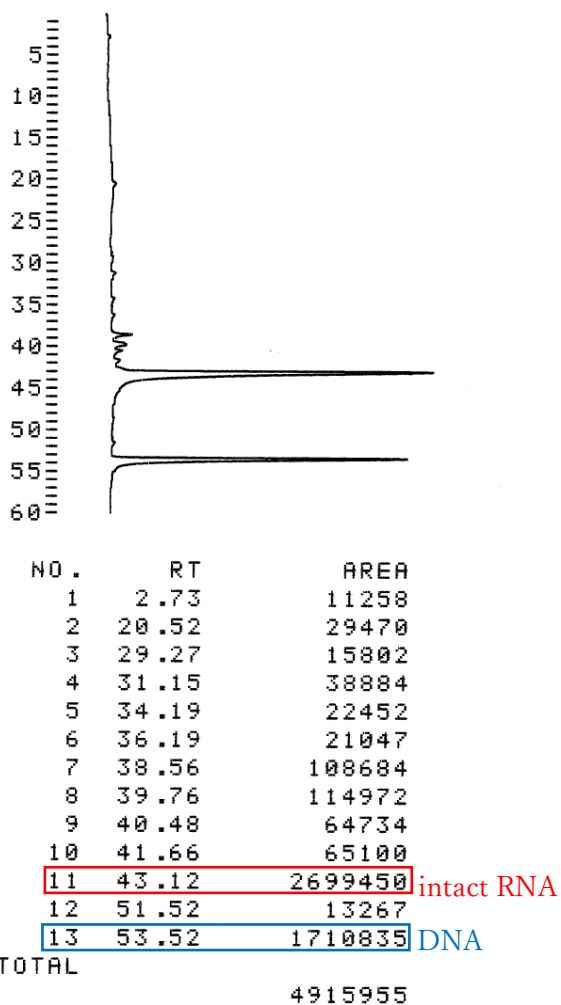

**Figure S74** RP-HPLC profile of the mixture of a 10mer DNA (D6) and a 24mer RNA (R2) in the presence of ODAGal4 after treatment with RNase H for 5 min (Figure 7). The RP-HPLC analysis (UV detection at 260 nm) was performed with a linear gradient of 0%–8% CH<sub>3</sub>CN in 0.1 M AA buffer (pH 7.0) at 50 °C for 60 min with a flow rate of 0.5 mL/min.

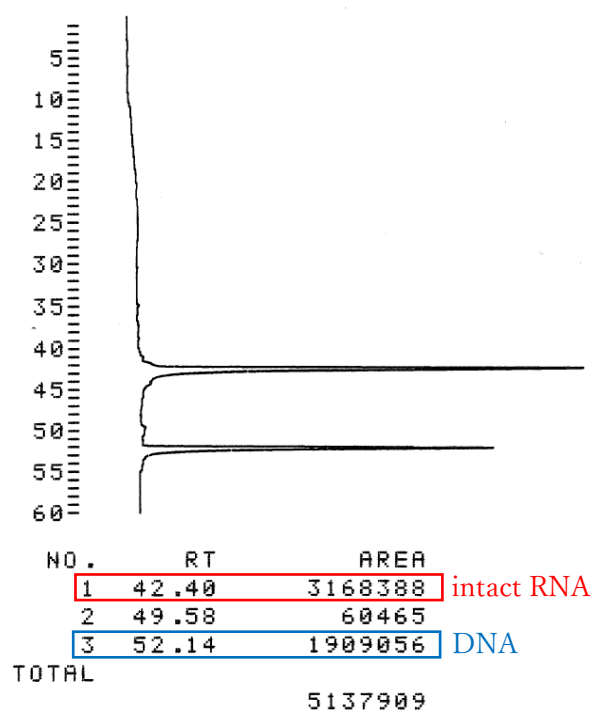

**Figure S75** RP-HPLC profile of the mixture of a 11mer DNA (D7) and a 24mer RNA (R1). The RP-HPLC analysis (UV detection at 260 nm) was performed with a linear gradient of 0%–8% CH<sub>3</sub>CN in 0.1 M AA buffer (pH 7.0) at 50 °C for 60 min with a flow rate of 0.5 mL/min.

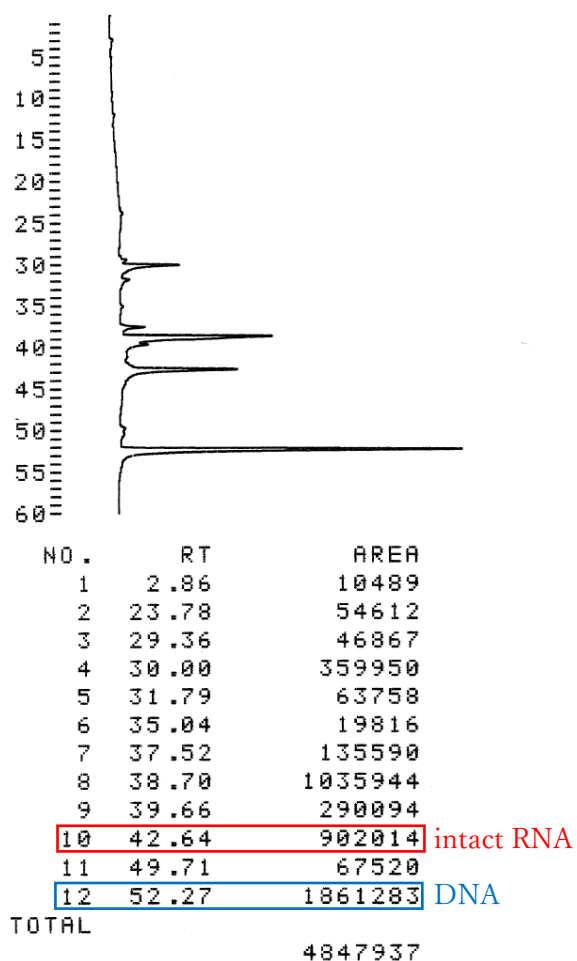

**Figure S76** RP-HPLC profile of the mixture of a 11mer DNA (D7) and a 24mer RNA (R1) in the absence of ODAGal4 after treatment with RNase H for 5 min (Figure 7). The RP-HPLC analysis (UV detection at 260 nm) was performed with a linear gradient of 0%–8% CH<sub>3</sub>CN in 0.1 M AA buffer (pH 7.0) at 50 °C for 60 min with a flow rate of 0.5 mL/min. The peak at 43 min is the intact RNA and the peak at 53 min is the DNA.

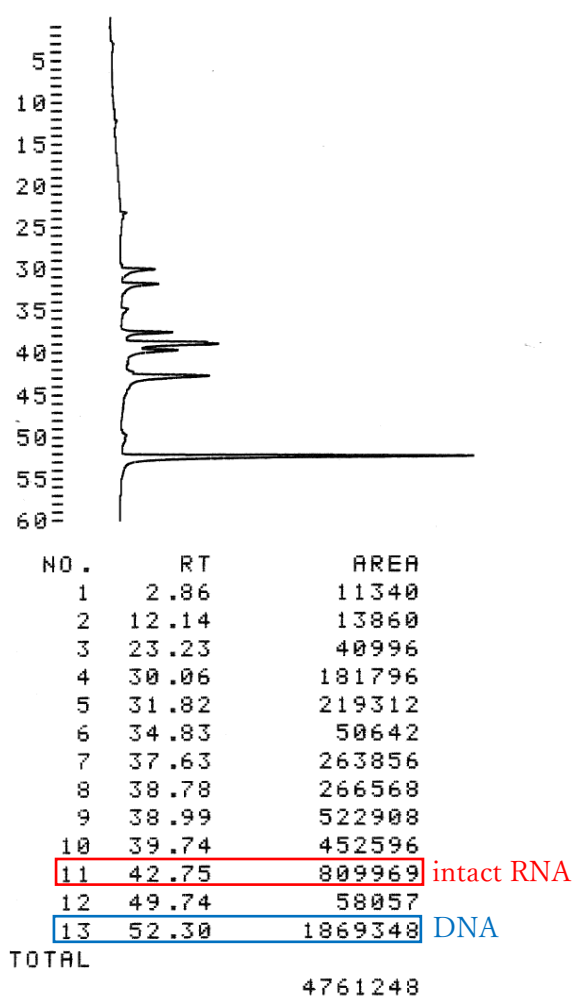

**Figure S77** RP-HPLC profile of the mixture of a 11mer DNA (D7) and a 24mer RNA (R1) in the presence of ODAGal4 after treatment with RNase H for 5 min (Figure 7). The RP-HPLC analysis (UV detection at 260 nm) was performed with a linear gradient of 0%–8% CH<sub>3</sub>CN in 0.1 M AA buffer (pH 7.0) at 50 °C for 60 min with a flow rate of 0.5 mL/min.

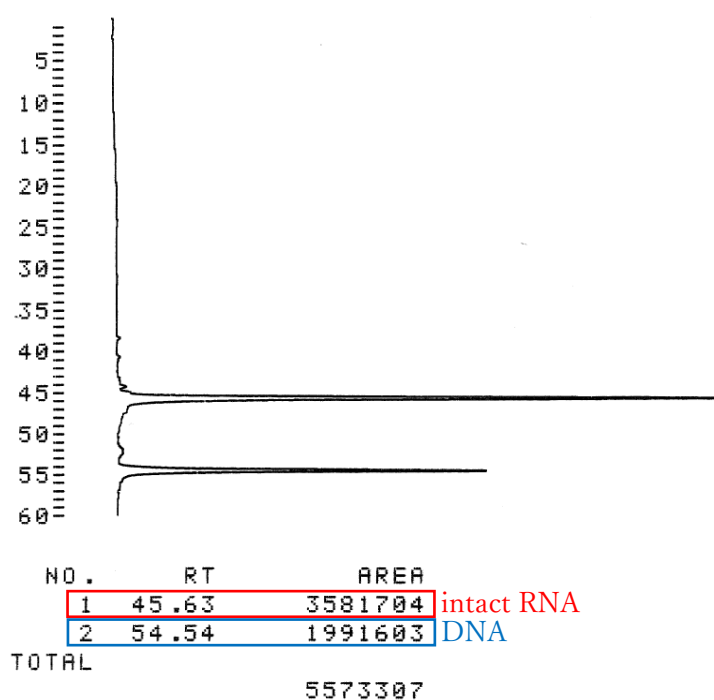

**Figure S78** RP-HPLC profile of the mixture of a 11mer DNA (D7) and a 24mer RNA (R2). The RP-HPLC analysis (UV detection at 260 nm) was performed with a linear gradient of 0%–8% CH<sub>3</sub>CN in 0.1 M AA buffer (pH 7.0) at 50 °C for 60 min with a flow rate of 0.5 mL/min.

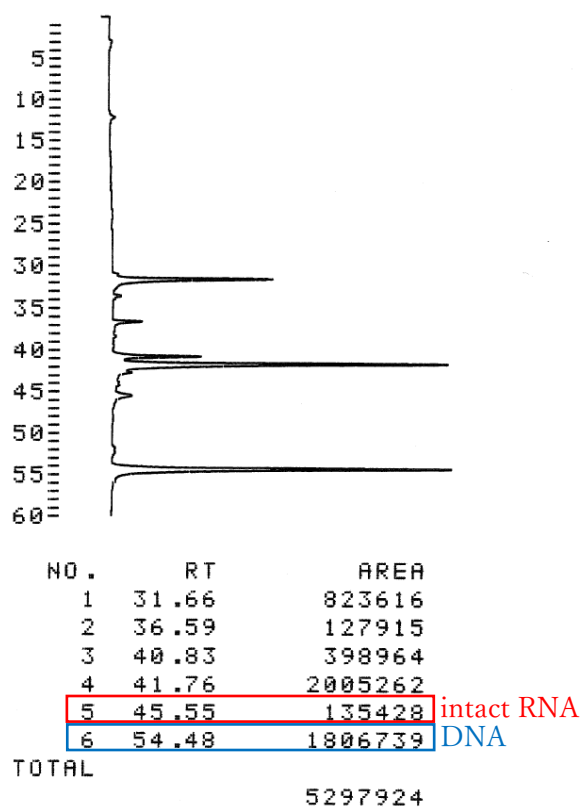

**Figure S79** RP-HPLC profile of the mixture of a 11mer DNA (D7) and a 24mer RNA (R2) in the absence of ODAGal4 after treatment with RNase H for 5 min (Figure 7). The RP-HPLC analysis (UV detection at 260 nm) was performed with a linear gradient of 0%–8% CH<sub>3</sub>CN in 0.1 M AA buffer (pH 7.0) at 50 °C for 60 min with a flow rate of 0.5 mL/min.

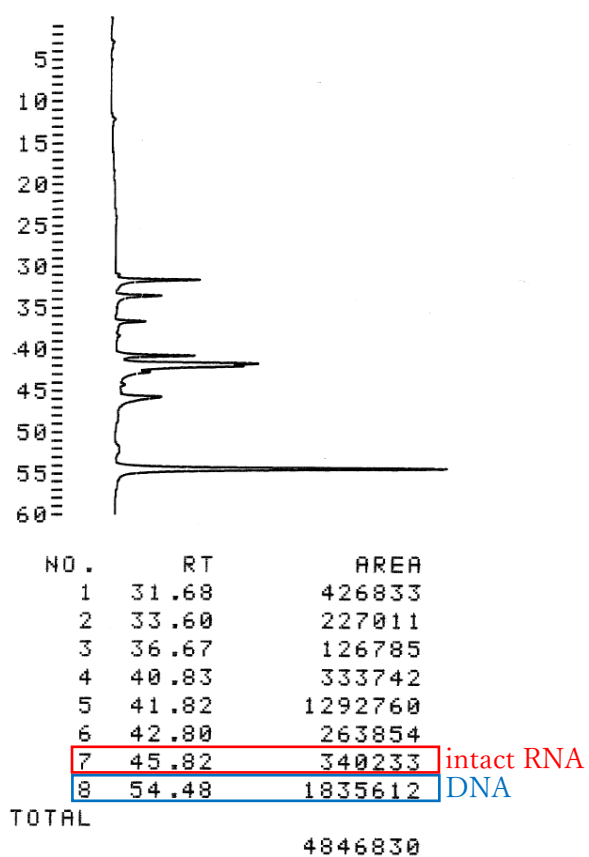

**Figure S80** RP-HPLC profile of the mixture of a 11mer DNA (D7) and a 24mer RNA (R2) in the presence of ODAGal4 after treatment with RNase H for 5 min (Figure 7). The RP-HPLC analysis (UV detection at 260 nm) was performed with a linear gradient of 0%–8% CH<sub>3</sub>CN in 0.1 M AA buffer (pH 7.0) at 50 °C for 60 min with a flow rate of 0.5 mL/min.

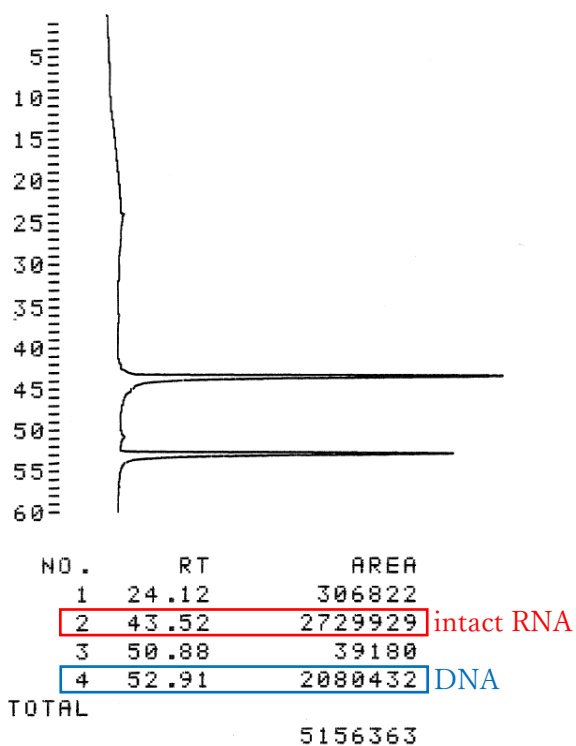

**Figure S81** RP-HPLC profile of the mixture of a 12mer DNA (D8) and a 24mer RNA (R1). The RP-HPLC analysis (UV detection at 260 nm) was performed with a linear gradient of 0%–8% CH<sub>3</sub>CN in 0.1 M AA buffer (pH 7.0) at 50 °C for 60 min with a flow rate of 0.5 mL/min.

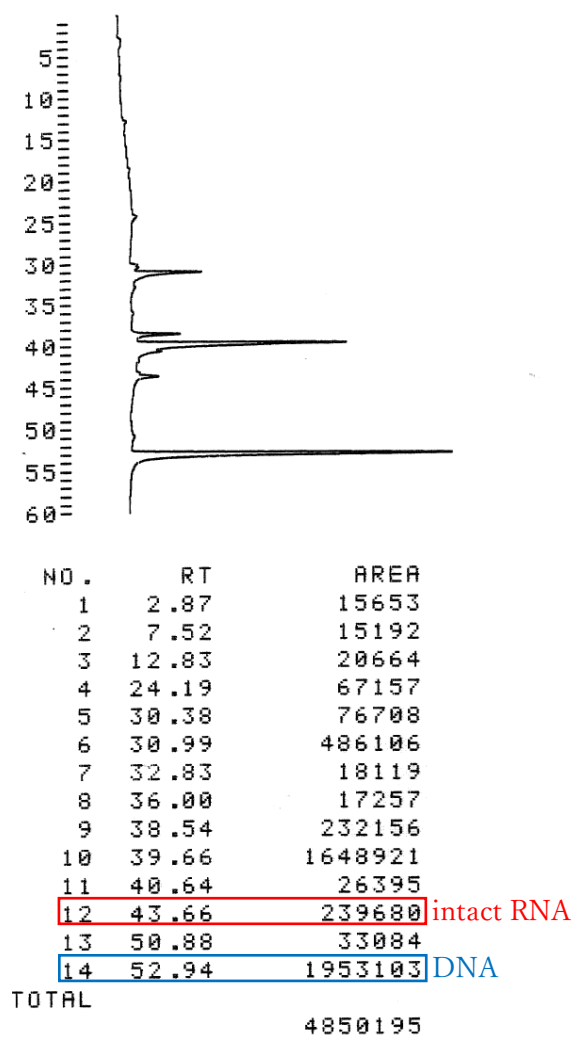

**Figure S82** RP-HPLC profile of the mixture of a 12mer DNA (D8) and a 24mer RNA (R1) in the absence of ODAGal4 after treatment with RNase H for 5 min (Figure 7). The RP-HPLC analysis (UV detection at 260 nm) was performed with a linear gradient of 0%–8% CH<sub>3</sub>CN in 0.1 M AA buffer (pH 7.0) at 50 °C for 60 min with a flow rate of 0.5 mL/min.

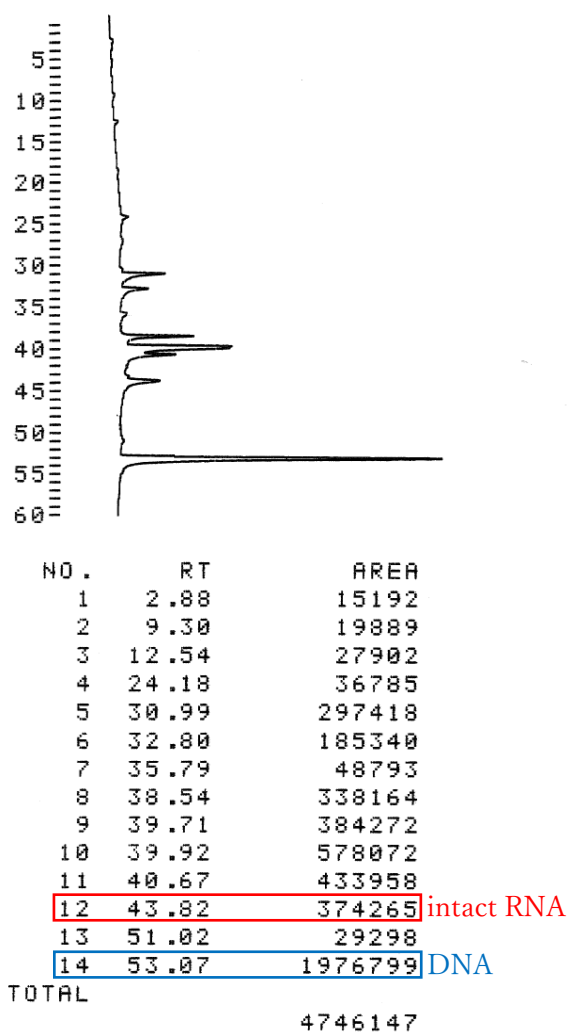

**Figure S83** RP-HPLC profile of the mixture of a 12mer DNA (D8) and a 24mer RNA (R1) in the presence of ODAGal4 after treatment with RNase H for 5 min (Figure 7). The RP-HPLC analysis (UV detection at 260 nm) was performed with a linear gradient of 0%–8% CH<sub>3</sub>CN in 0.1 M AA buffer (pH 7.0) at 50 °C for 60 min with a flow rate of 0.5 mL/min.

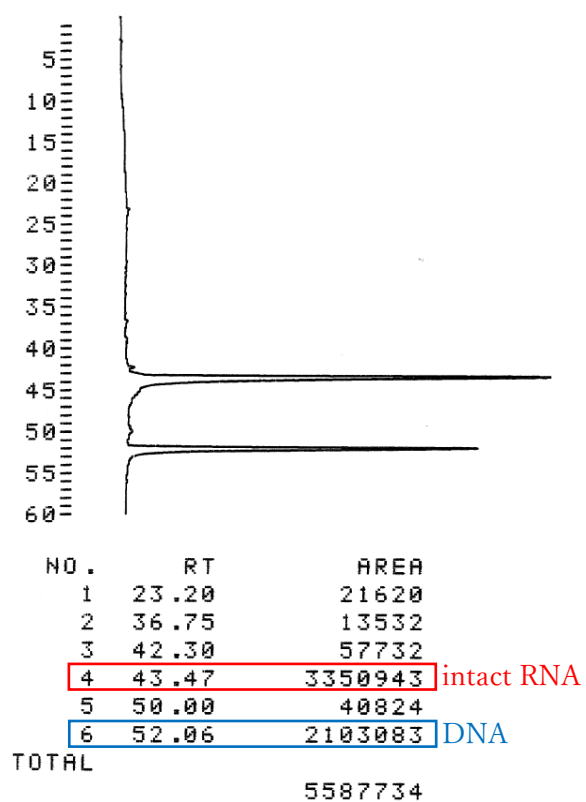

**Figure S84** RP-HPLC profile of the mixture of a 12mer DNA (D8) and a 24mer RNA (R2). The RP-HPLC analysis (UV detection at 260 nm) was performed with a linear gradient of 0%–8% CH<sub>3</sub>CN in 0.1 M AA buffer (pH 7.0) at 50 °C for 60 min with a flow rate of 0.5 mL/min.

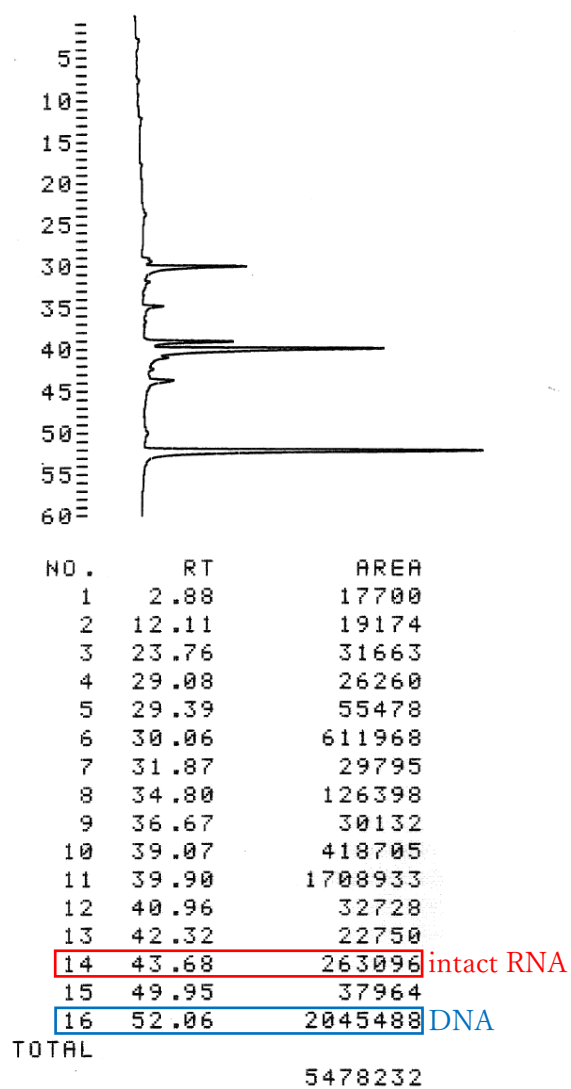

**Figure S85** RP-HPLC profile of the mixture of a 12mer DNA (D8) and a 24mer RNA (R2) in the absence of ODAGal4 after treatment with RNase H for 5 min (Figure 7). The RP-HPLC analysis (UV detection at 260 nm) was performed with a linear gradient of 0%–8% CH<sub>3</sub>CN in 0.1 M AA buffer (pH 7.0) at 50 °C for 60 min with a flow rate of 0.5 mL/min.

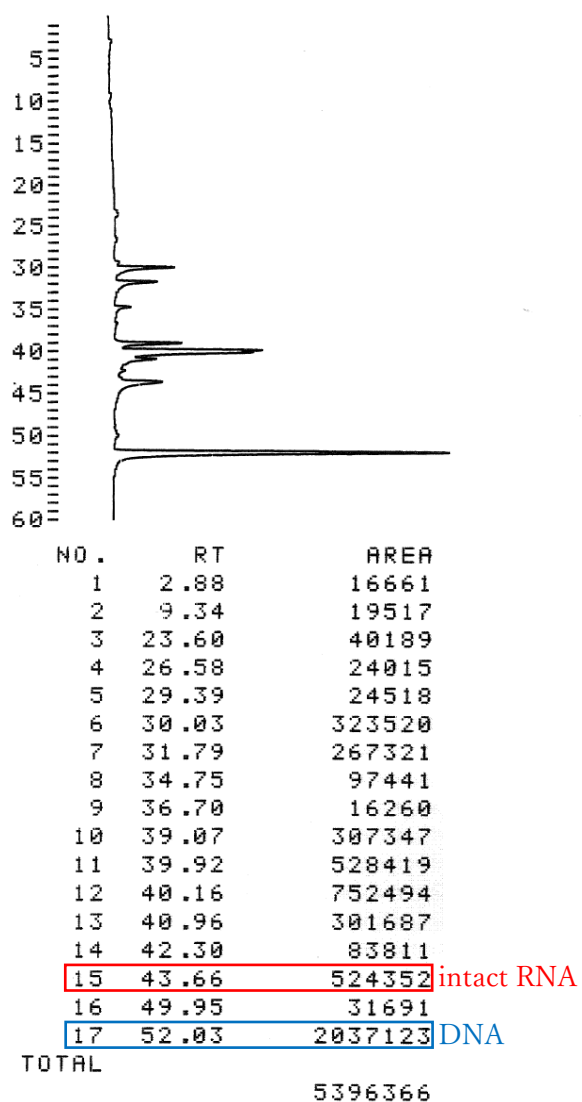

**Figure S86** RP-HPLC profile of the mixture of a 12mer DNA (D8) and a 24mer RNA (R2) in the presence of ODAGal4 after treatment with RNase H for 5 min (Figure 7). The RP-HPLC analysis (UV detection at 260 nm) was performed with a linear gradient of 0%–8% CH<sub>3</sub>CN in 0.1 M AA buffer (pH 7.0) at 50 °C for 60 min with a flow rate of 0.5 mL/min.

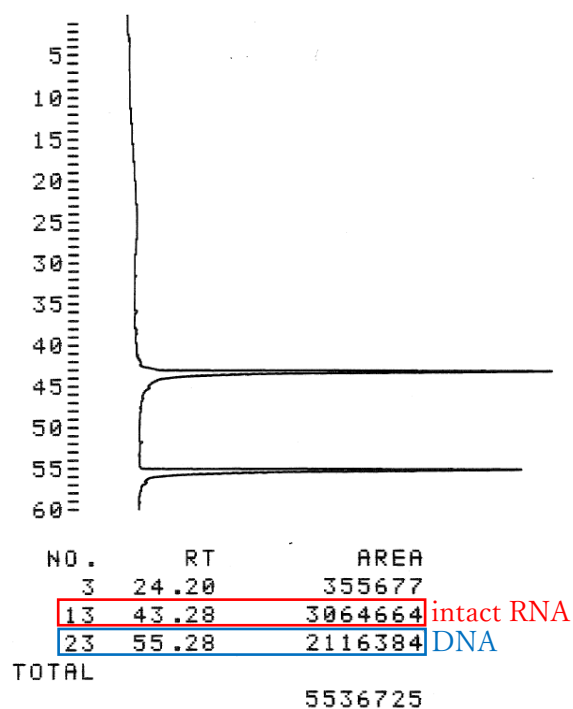

**Figure S87** RP-HPLC profile of the mixture of a 12mer DNA (D9) and a 24mer RNA (R1), which was used for the calculation of the amount of the cleaved RNA in Figure S88 and S89. The RP-HPLC analysis (UV detection at 260 nm) was performed with a linear gradient of 0%–8% CH<sub>3</sub>CN in 0.1 M AA buffer (pH 7.0) at 50 °C for 60 min with a flow rate of 0.5 mL/min.

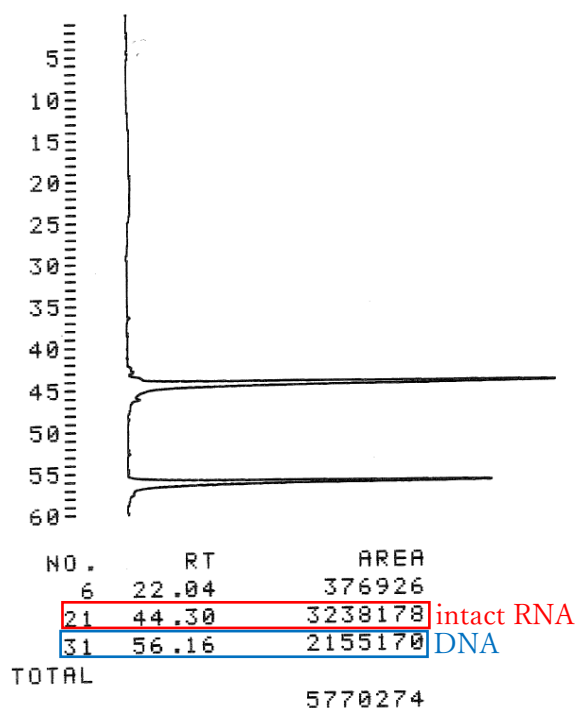

**Figure S88** RP-HPLC profile of the mixture of a 12mer DNA (D9) and a 24mer RNA (R1), which was used for the calculation of the amount of the cleaved RNA in Figure S90–93. The RP-HPLC analysis (UV detection at 260 nm) was performed with a linear gradient of 0%–8% CH<sub>3</sub>CN in 0.1 M AA buffer (pH 7.0) at 50 °C for 60 min with a flow rate of 0.5 mL/min.

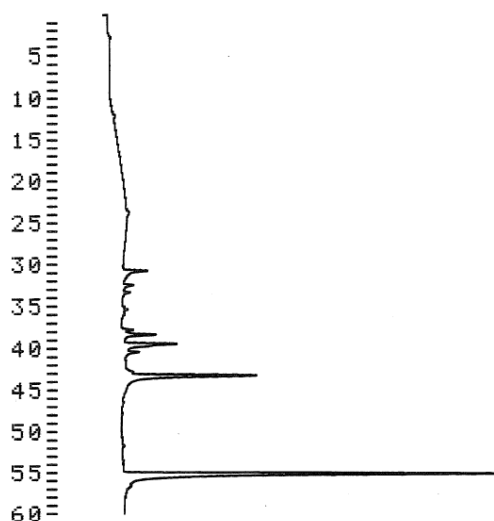

| NO.   | RT    | AREA    |            |
|-------|-------|---------|------------|
| 5     | 30.75 | 153316  |            |
| 13    | 38.35 | 173854  |            |
| 14    | 39.47 | 310545  |            |
| 15    | 40.43 | 114048  |            |
| 19    | 43.28 | 831970  | intact RNA |
| 25    | 55.15 | 2033896 | DNA        |
| TOTAL |       | 3617629 |            |

**Figure S89** RP-HPLC profile of the mixture of a 12mer DNA (D9) and a 24mer RNA (R1) in the absence of ODAGal4 after treatment with RNase H for 2 min (Figure 9, Run #1). The RP-HPLC analysis (UV detection at 260 nm) was performed with a linear gradient of 0%–8% CH<sub>3</sub>CN in 0.1 M AA buffer (pH 7.0) at 50 °C for 60 min with a flow rate of 0.5 mL/min.

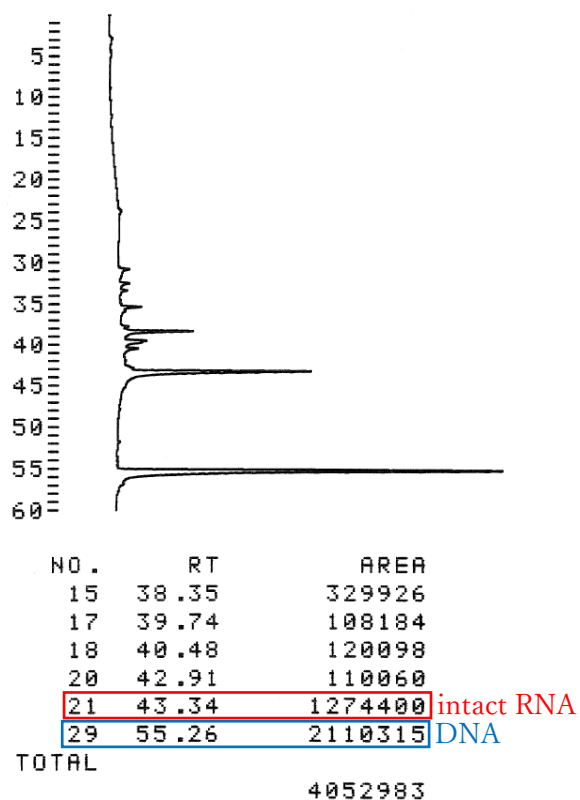

**Figure S90** RP-HPLC profile of the mixture of a 12mer DNA (D9) and a 24mer RNA (R1) in the absence of ODAGal4 after treatment with RNase H for 2 min (Figure 9, Run #1). The RP-HPLC analysis (UV detection at 260 nm) was performed with a linear gradient of 0%–8% CH<sub>3</sub>CN in 0.1 M AA buffer (pH 7.0) at 50 °C for 60 min with a flow rate of 0.5 mL/min.

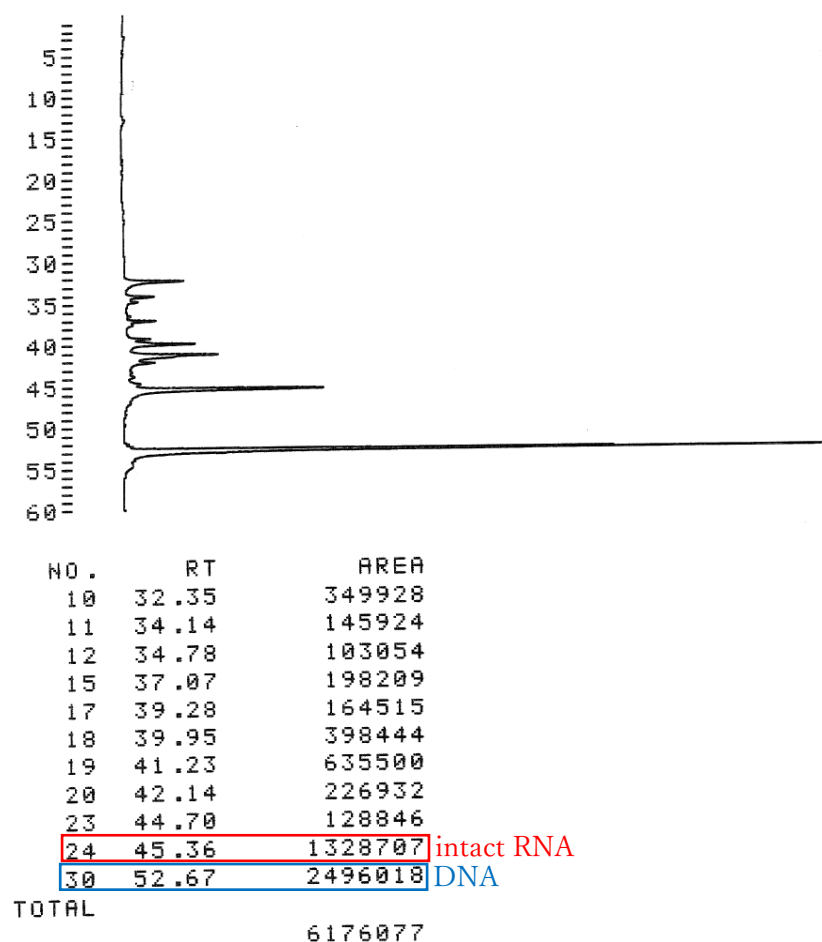

**Figure S91** RP-HPLC profile of the mixture of a 12mer DNA (D9) and a 24mer RNA (R1) in the absence of ODAGal4 after treatment with RNase H for 2 min (Figure 9, Run #2). The RP-HPLC analysis (UV detection at 260 nm) was performed with a linear gradient of 0%–6% CH<sub>3</sub>CN for 45 min, followed by a linear gradient of 6%–30% for 15 min in 0.1 M AA buffer (pH 7.0) at 50 °C with a flow rate of 0.5 mL/min.

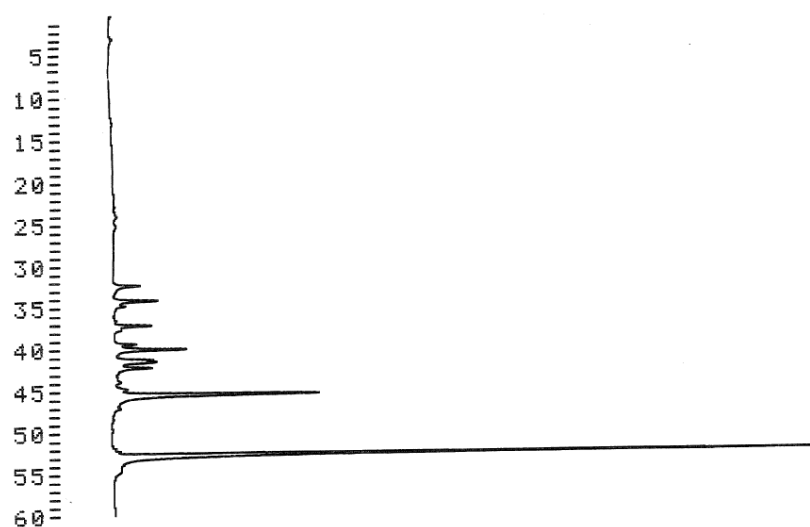

| NO.   | RT    | AREA    |
|-------|-------|---------|
| 13    | 32.43 | 147817  |
| 14    | 34.22 | 193380  |
| 18    | 37.18 | 192734  |
| 20    | 39.39 | 111175  |
| 21    | 40.06 | 379075  |
| 22    | 41.34 | 172380  |
| 23    | 41.58 | 194222  |
| 24    | 42.27 | 240948  |
| 27    | 44.78 | 103856  |
| 28    | 45.47 | 1258114 |
| 34    | 52.67 | 2396884 |
| TOTAL |       | 5390585 |

intact RNA  
DNA

**Figure S92** RP-HPLC profile of the mixture of a 12mer DNA (D9) and a 24mer RNA (R1) in the presence of ODAGal4 after treatment with RNase H for 2 min (Figure 9, Run #2). The RP-HPLC analysis (UV detection at 260 nm) was performed with a linear gradient of 0%–6% CH<sub>3</sub>CN for 45 min, followed by a linear gradient of 6%–30% for 15 min in 0.1 M AA buffer (pH 7.0) at 50 °C with a flow rate of 0.5 mL/min.

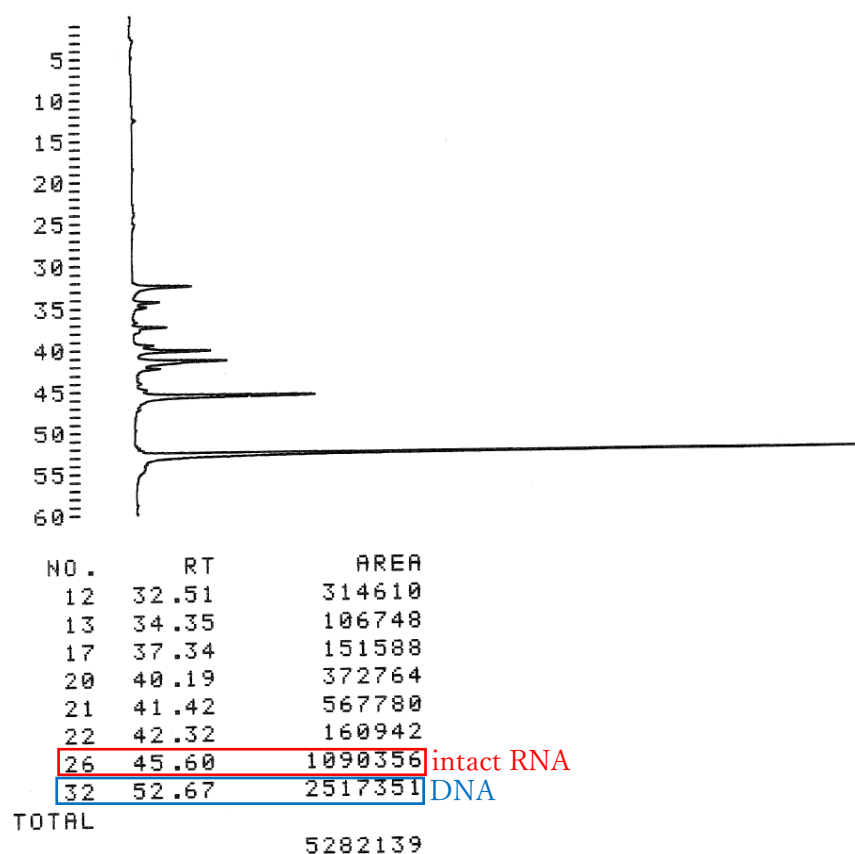

**Figure S93** RP-HPLC profile of the mixture of a 12mer DNA (D9) and a 24mer RNA (R1) in the absence of ODAGal4 after treatment with RNase H for 2 min (Figure 9, Run #3). The RP-HPLC analysis (UV detection at 260 nm) was performed with a linear gradient of 0%–6% CH<sub>3</sub>CN for 45 min, followed by a linear gradient of 6%–30% for 15 min in 0.1 M AA buffer (pH 7.0) at 50 °C with a flow rate of 0.5 mL/min.

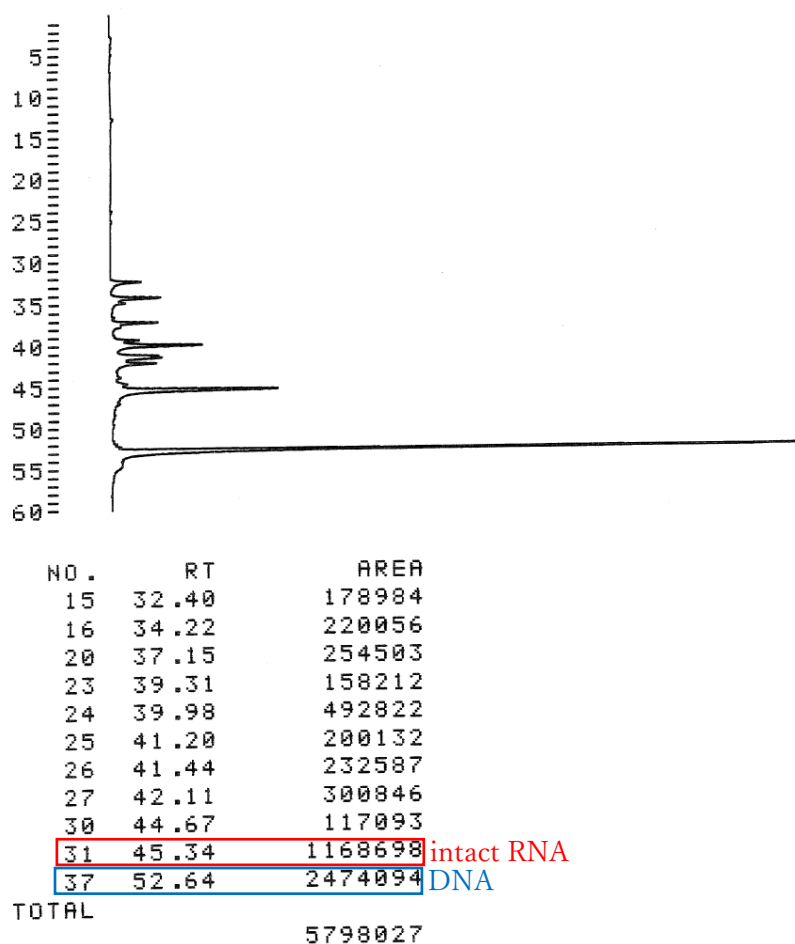

intact RNA  
DNA

**Figure S94** RP-HPLC profile of the mixture of a 12mer DNA (D9) and a 24mer RNA (R1) in the presence of ODAGal4 after treatment with RNase H for 2 min (Figure 9, Run #3). The RP-HPLC analysis (UV detection at 260 nm) was performed with a linear gradient of 0%–6% CH<sub>3</sub>CN for 45 min, followed by a linear gradient of 6%–30% for 15 min in 0.1 M AA buffer (pH 7.0) at 50 °C with a flow rate of 0.5 mL/min.

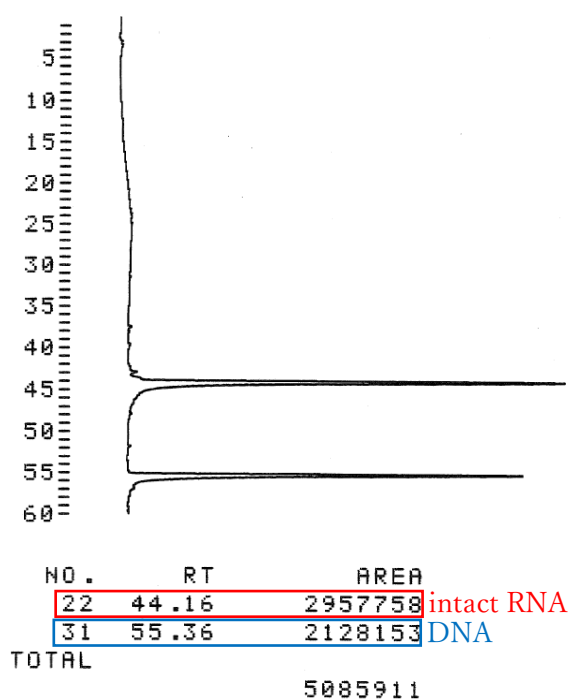

**Figure S95** RP-HPLC profile of the mixture of a 12mer DNA (D9) and a 24mer RNA (R2), which was used for the calculation of the amount of the cleaved RNA in Figure S97 and S98. The RP-HPLC analysis (UV detection at 260 nm) was performed with a linear gradient of 0%–8% CH<sub>3</sub>CN in 0.1 M AA buffer (pH 7.0) at 50 °C for 60 min with a flow rate of 0.5 mL/min.

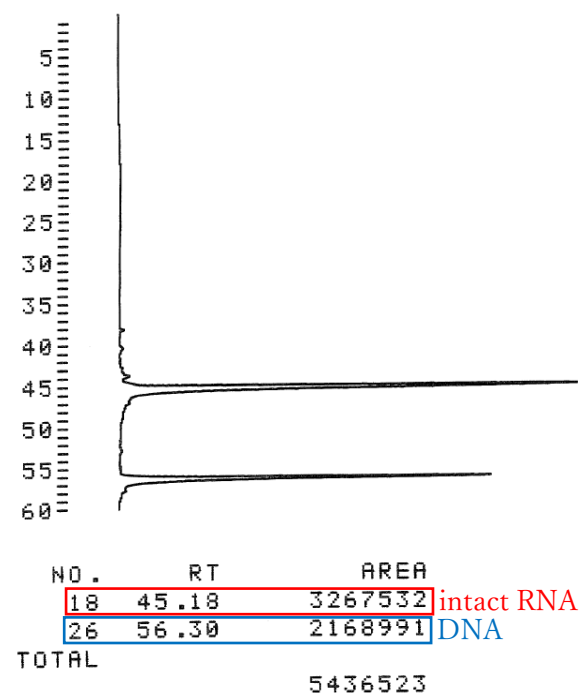

**Figure S96** RP-HPLC profile of the mixture of a 12mer DNA (D9) and a 24mer RNA (R2), which was used for the calculation of the amount of the cleaved RNA in Figure S99–102. The RP-HPLC analysis (UV detection at 260 nm) was performed with a linear gradient of 0%–8% CH<sub>3</sub>CN in 0.1 M AA buffer (pH 7.0) at 50 °C for 60 min with a flow rate of 0.5 mL/min.

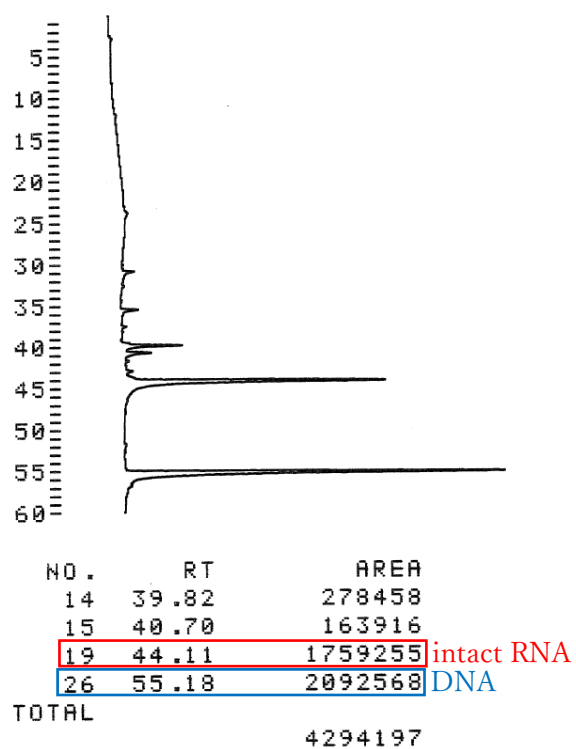

**Figure S97** RP-HPLC profile of the mixture of a 12mer DNA (D9) and a 24mer RNA (R2) in the absence of ODAGal4 after treatment with RNase H for 2 min (Figure 9, Run #1). The RP-HPLC analysis (UV detection at 260 nm) was performed with a linear gradient of 0%–8% CH<sub>3</sub>CN in 0.1 M AA buffer (pH 7.0) at 50 °C for 60 min with a flow rate of 0.5 mL/min.

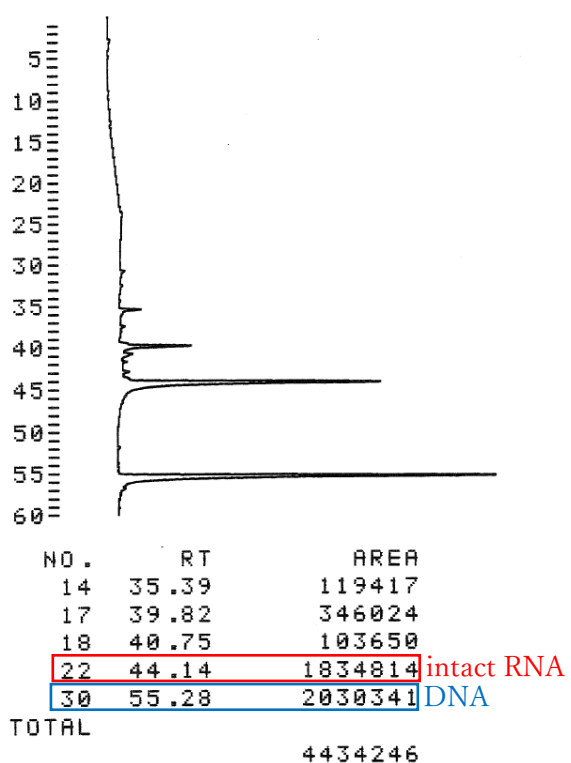

**Figure S98** RP-HPLC profile of the mixture of a 12mer DNA (D9) and a 24mer RNA (R2) in the presence of ODAGal4 after treatment with RNase H for 2 min (Figure 9, Run #1). The RP-HPLC analysis (UV detection at 260 nm) was performed with a linear gradient of 0%–8% CH<sub>3</sub>CN in 0.1 M AA buffer (pH 7.0) at 50 °C for 60 min with a flow rate of 0.5 mL/min.

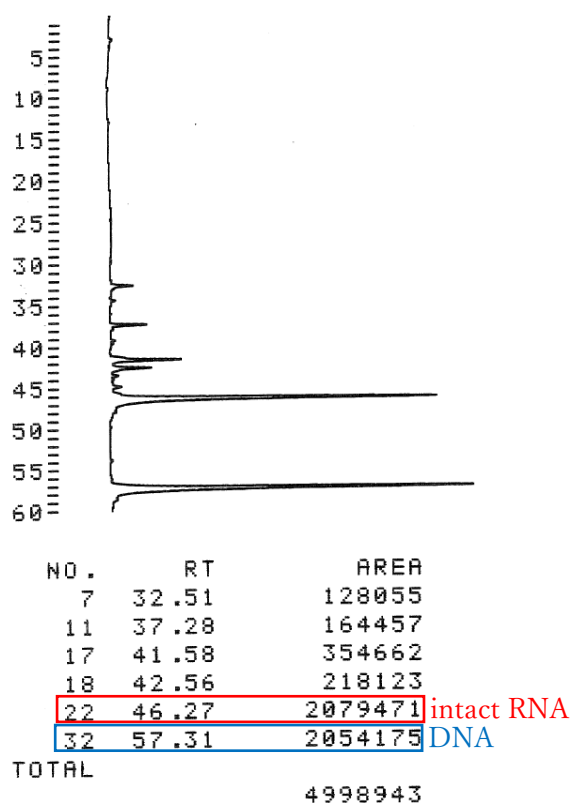

**Figure S99** RP-HPLC profile of the mixture of a 12mer DNA (D9) and a 24mer RNA (R2) in the absence of ODAGal4 after treatment with RNase H for 2 min (Figure 9, Run #2). The RP-HPLC analysis (UV detection at 260 nm) was performed with a linear gradient of 0%–8% CH<sub>3</sub>CN in 0.1 M AA buffer (pH 7.0) at 50 °C for 60 min with a flow rate of 0.5 mL/min.

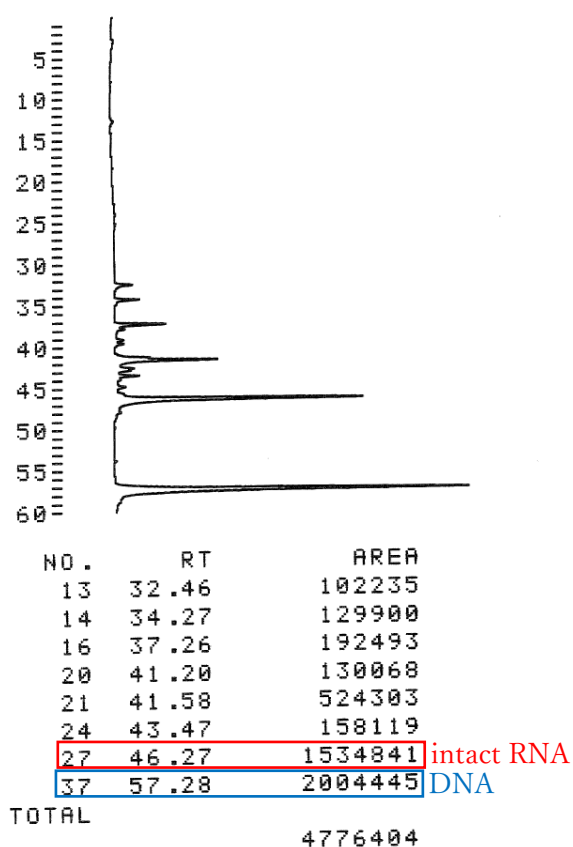

**Figure S100** RP-HPLC profile of the mixture of a 12mer DNA (D9) and a 24mer RNA (R2) in the presence of ODAGal4 after treatment with RNase H for 2 min (Figure 9, Run #2). The RP-HPLC analysis (UV detection at 260 nm) was performed with a linear gradient of 0%–8% CH<sub>3</sub>CN in 0.1 M AA buffer (pH 7.0) at 50 °C for 60 min with a flow rate of 0.5 mL/min.

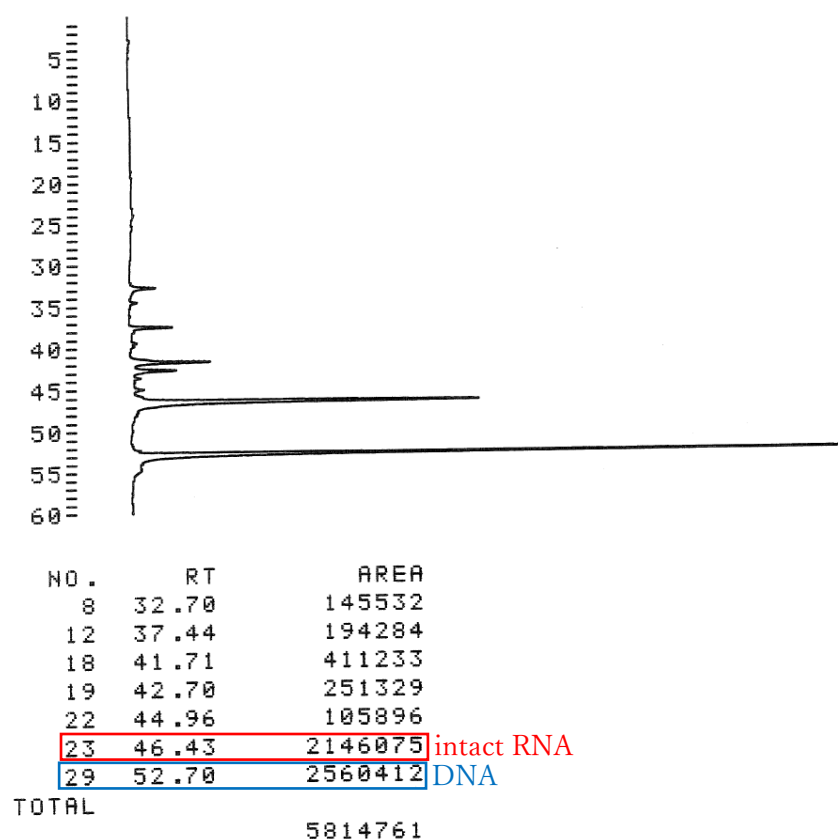

**Figure S101** RP-HPLC profile of the mixture of a 12mer DNA (D9) and a 24mer RNA (R2) in the absence of ODAGal4 after treatment with RNase H for 2 min (Figure 9, Run #3). The RP-HPLC analysis (UV detection at 260 nm) was performed with a linear gradient of 0%–6% CH<sub>3</sub>CN for 45 min, followed by a linear gradient of 6%–30% for 15 min in 0.1 M AA buffer (pH 7.0) at 50 °C with a flow rate of 0.5 mL/min.

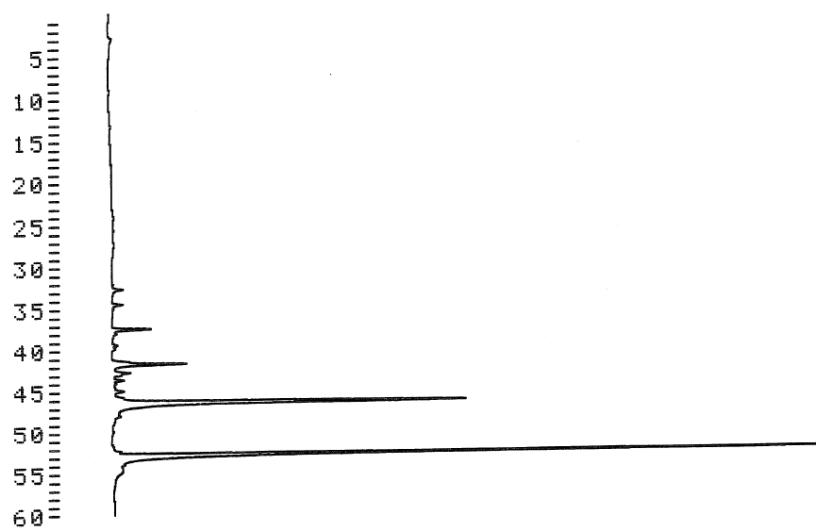

| NO.   | RT    | AREA    |
|-------|-------|---------|
| 16    | 37.39 | 174423  |
| 22    | 41.68 | 377600  |
| 28    | 46.32 | 2141362 |
| 34    | 52.67 | 2459876 |
| TOTAL |       | 5153261 |

intact RNA

DNA

**Figure S102** RP-HPLC profile of the mixture of a 12mer DNA (D9) and a 24mer RNA (R2) in the presence of ODAGal4 after treatment with RNase H for 2 min (Figure 9, Run #3). The RP-HPLC analysis (UV detection at 260 nm) was performed with a linear gradient of 0%–6% CH<sub>3</sub>CN for 45 min, followed by a linear gradient of 6%–30% for 15 min in 0.1 M AA buffer (pH 7.0) at 50 °C with a flow rate of 0.5 mL/min.

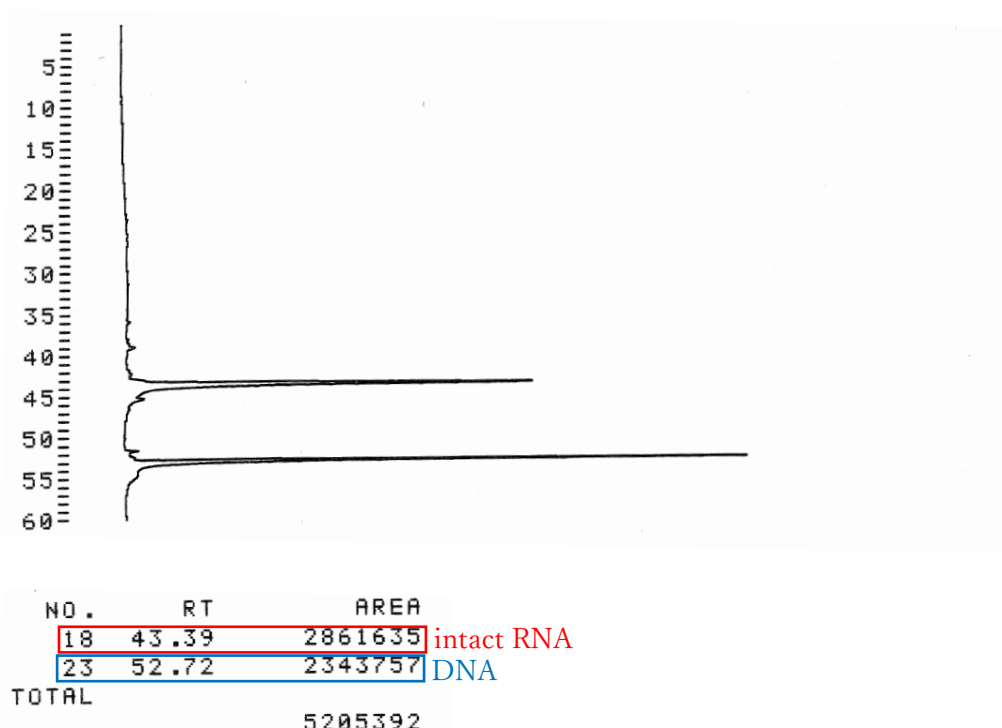

**Figure S103** RP-HPLC profile of the mixture of a 12mer DNA (D10) and a 24mer RNA (R1). The RP-HPLC analysis (UV detection at 260 nm) was performed using a linear gradient of 0%–6% CH<sub>3</sub>CN for 45 min, followed by a linear gradient of 6%–30% for 15 min in 0.1 M AA buffer (pH 7.0) for 60 min at 50 °C with a flow rate of 0.5 mL/min.

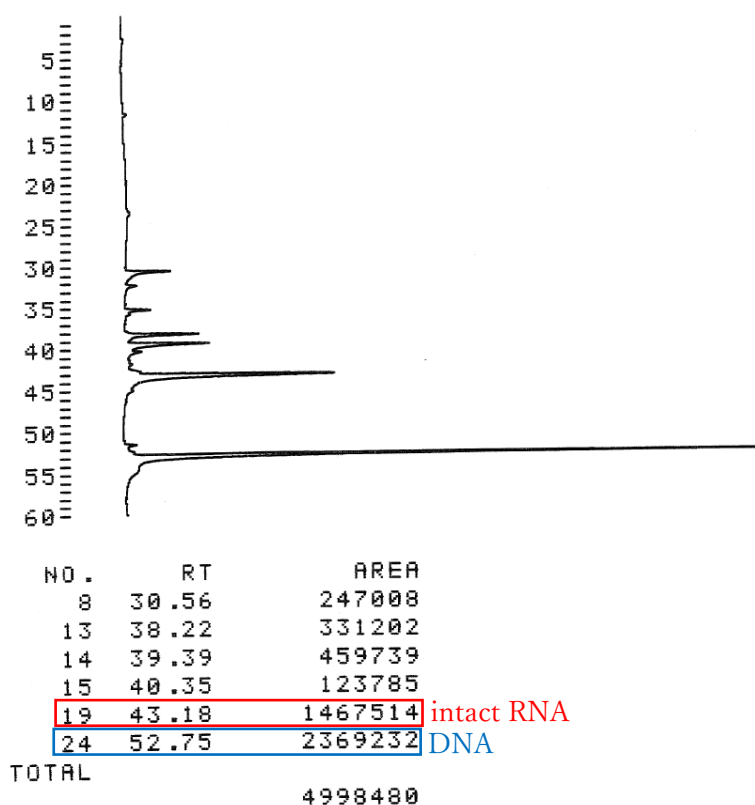

**Figure S104** RP-HPLC profile of the mixture of a 12mer DNA (D10) and a 24mer RNA (R1) in the absence of ODAGal4 after treatment with RNase H for 2 min (Figure 9, Run #1). The RP-HPLC analysis (UV detection at 260 nm) was performed using a linear gradient of 0%–6% CH<sub>3</sub>CN for 45 min, followed by a linear gradient of 6%–30% for 15 min in 0.1 M AA buffer (pH 7.0) for 60 min at 50 °C with a flow rate of 0.5 mL/min.

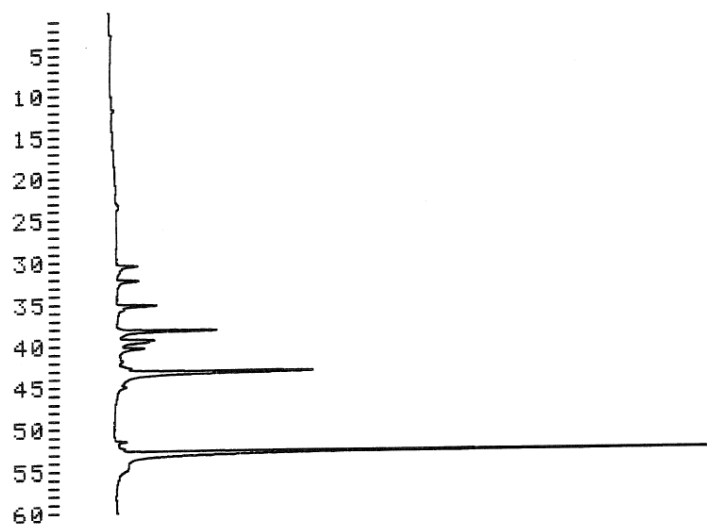

| NO.   | RT    | AREA    |
|-------|-------|---------|
| 10    | 30.56 | 124218  |
| 11    | 32.30 | 117905  |
| 13    | 35.26 | 214199  |
| 15    | 38.22 | 435673  |
| 16    | 39.39 | 145894  |
| 17    | 39.58 | 144918  |
| 18    | 40.32 | 182312  |
| 22    | 43.15 | 1350065 |
| 27    | 52.75 | 2326156 |
| TOTAL |       | 5041340 |

intact RNA

DNA

**Figure S105** RP-HPLC profile of the mixture of a 12mer DNA (D10) and a 24mer RNA (R1) in the presence of ODAGal4 after treatment with RNase H for 2 min (Figure 9, Run #1). The RP-HPLC analysis (UV detection at 260 nm) was performed using a linear gradient of 0%–6% CH<sub>3</sub>CN for 45 min, followed by a linear gradient of 6%–30% for 15 min in 0.1 M AA buffer (pH 7.0) for 60 min at 50 °C with a flow rate of 0.5 mL/min.

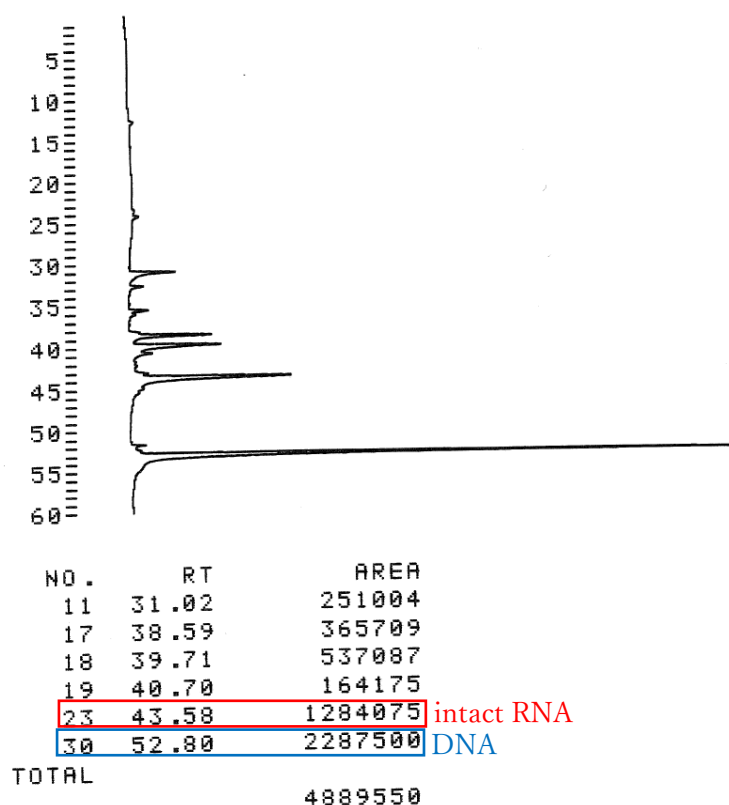

**Figure S106** RP-HPLC profile of the mixture of a 12mer DNA (D10) and a 24mer RNA (R1) in the absence of ODAGal4 after treatment with RNase H for 2 min (Figure 9, Run #2). The RP-HPLC analysis (UV detection at 260 nm) was performed using a linear gradient of 0%–6% CH<sub>3</sub>CN for 45 min, followed by a linear gradient of 6%–30% for 15 min in 0.1 M AA buffer (pH 7.0) for 60 min at 50 °C with a flow rate of 0.5 mL/min.

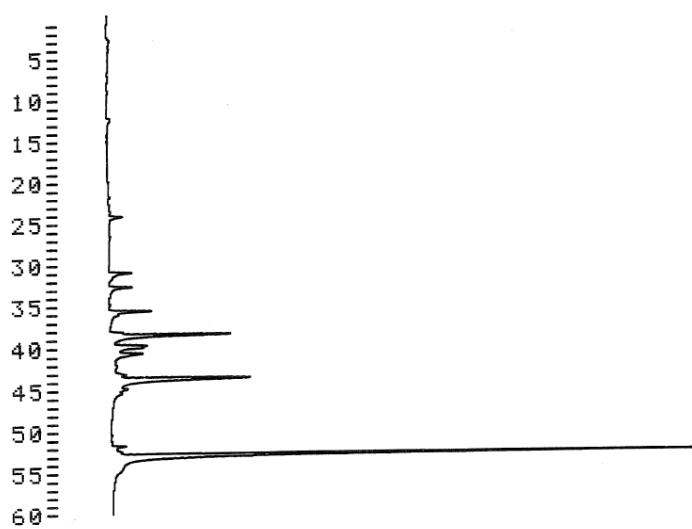

| NO.   | RT    | AREA    |
|-------|-------|---------|
| 14    | 30.99 | 132244  |
| 15    | 32.70 | 125017  |
| 17    | 35.63 | 233082  |
| 20    | 38.54 | 570881  |
| 21    | 39.76 | 130955  |
| 22    | 39.98 | 186307  |
| 23    | 40.72 | 302026  |
| 27    | 43.63 | 1075166 |
| 34    | 52.80 | 2217926 |
| TOTAL |       | 4973604 |

intact RNA  
DNA

**Figure S107** RP-HPLC profile of the mixture of a 12mer DNA (D10) and a 24mer RNA (R1) in the presence of ODAGal4 after treatment with RNase H for 2 min (Figure 9, Run #2). The RP-HPLC analysis (UV detection at 260 nm) was performed using a linear gradient of 0%–6% CH<sub>3</sub>CN for 45 min, followed by a linear gradient of 6%–30% for 15 min in 0.1 M AA buffer (pH 7.0) for 60 min at 50 °C with a flow rate of 0.5 mL/min.

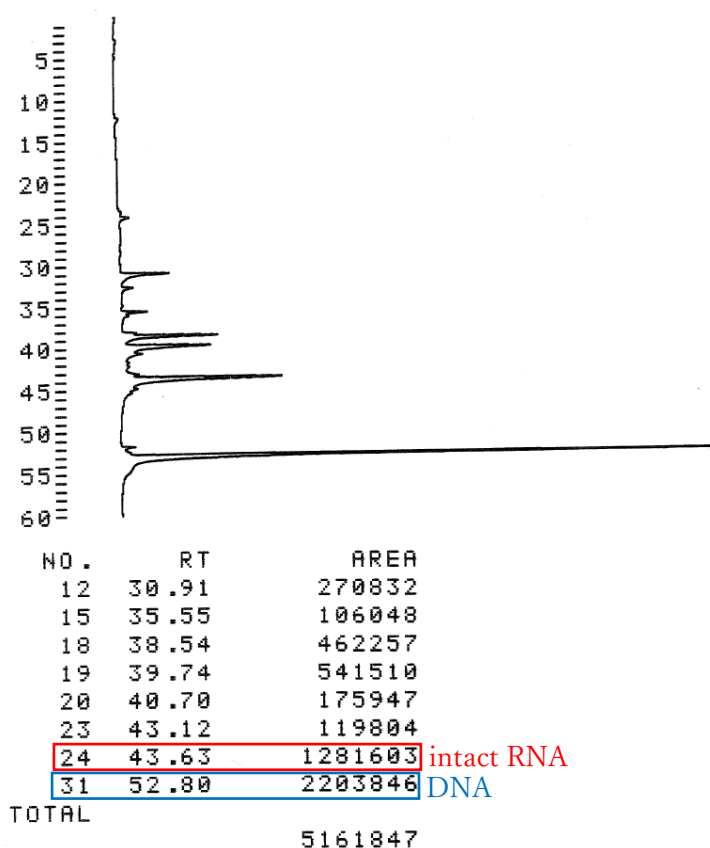

intact RNA

DNA

**Figure S108** RP-HPLC profile of the mixture of a 12mer DNA (D10) and a 24mer RNA (R1) in the absence of ODAGal4 after treatment with RNase H for 2 min (Figure 9, Run #3). The RP-HPLC analysis (UV detection at 260 nm) was performed using a linear gradient of 0%–6% CH<sub>3</sub>CN for 45 min, followed by a linear gradient of 6%–30% for 15 min in 0.1 M AA buffer (pH 7.0) for 60 min at 50 °C with a flow rate of 0.5 mL/min.

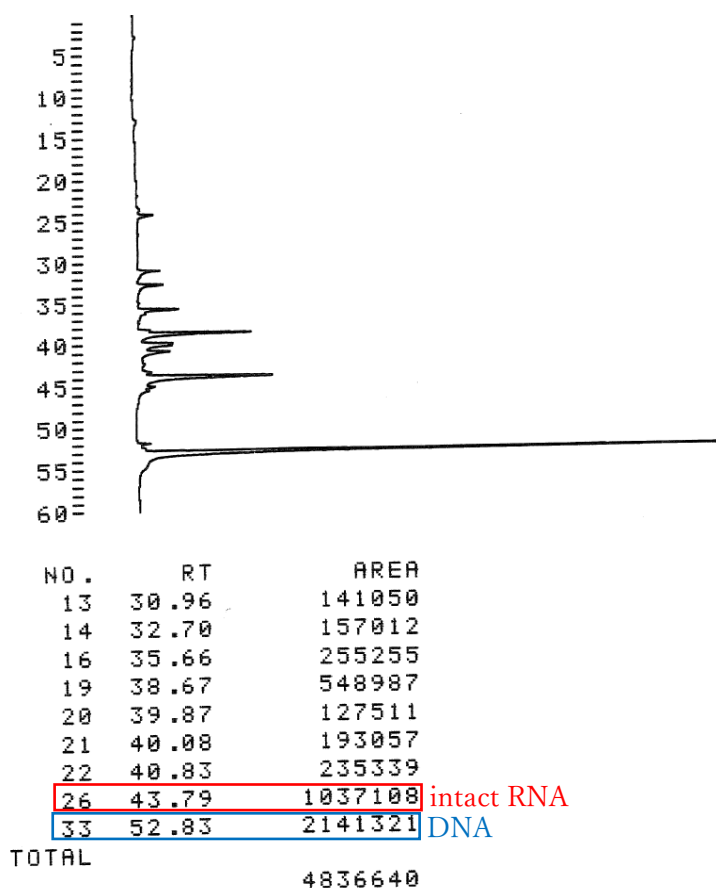

intact RNA

DNA

**Figure S109** RP-HPLC profile of the mixture of a 12mer DNA (D10) and a 24mer RNA (R1) in the presence of ODAGal4 after treatment with RNase H for 2 min (Figure 9, Run #3). The RP-HPLC analysis (UV detection at 260 nm) was performed using a linear gradient of 0%–6% CH<sub>3</sub>CN for 45 min, followed by a linear gradient of 6%–30% for 15 min in 0.1 M AA buffer (pH 7.0) for 60 min at 50 °C with a flow rate of 0.5 mL/min.

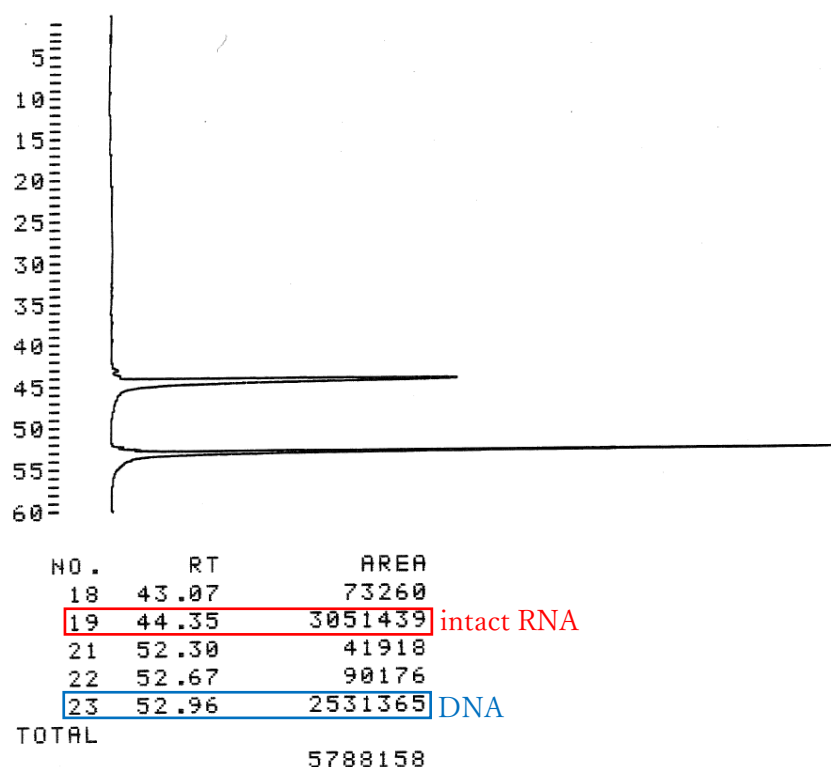

**Figure S110** RP-HPLC profile of the mixture of a 12mer DNA (D10) and a 24mer RNA (R2), which was used for the calculation of the amount of the cleaved RNA in Figure S112–S115. The RP-HPLC analysis (UV detection at 260 nm) was performed using a linear gradient of 0%–6% CH<sub>3</sub>CN for 45 min, followed by a linear gradient of 6%–30% for 15 min in 0.1 M AA buffer (pH 7.0) for 60 min at 50 °C with a flow rate of 0.5 mL/min.

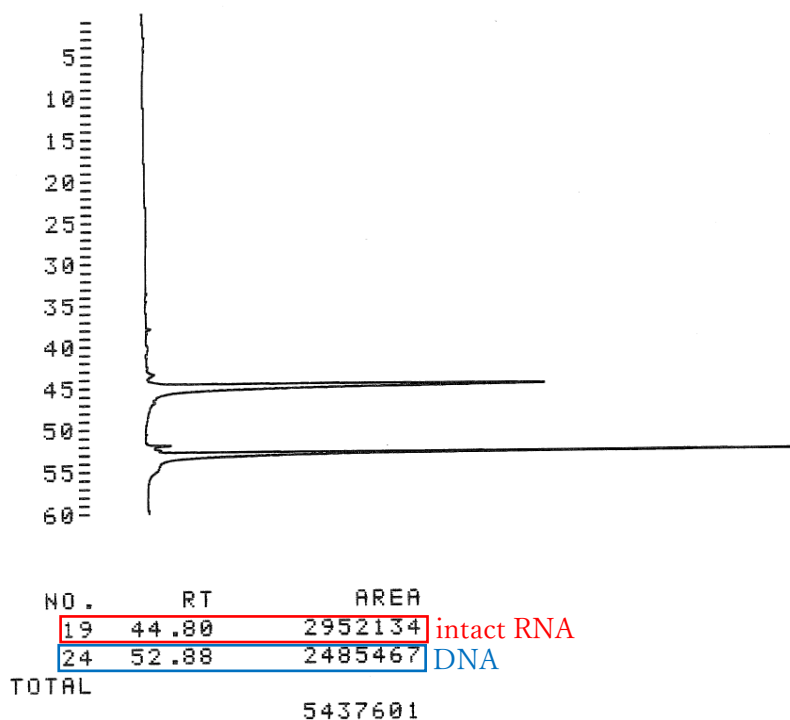

**Figure S111** RP-HPLC profile of the mixture of a 12mer DNA (D10) and a 24mer RNA (R2), which was used for the calculation of the amount of the cleaved RNA in Figure S116 and S117. The RP-HPLC analysis (UV detection at 260 nm) was performed using a linear gradient of 0%–6% CH<sub>3</sub>CN for 45 min, followed by a linear gradient of 6%–30% for 15 min in 0.1 M AA buffer (pH 7.0) for 60 min at 50 °C with a flow rate of 0.5 mL/min.

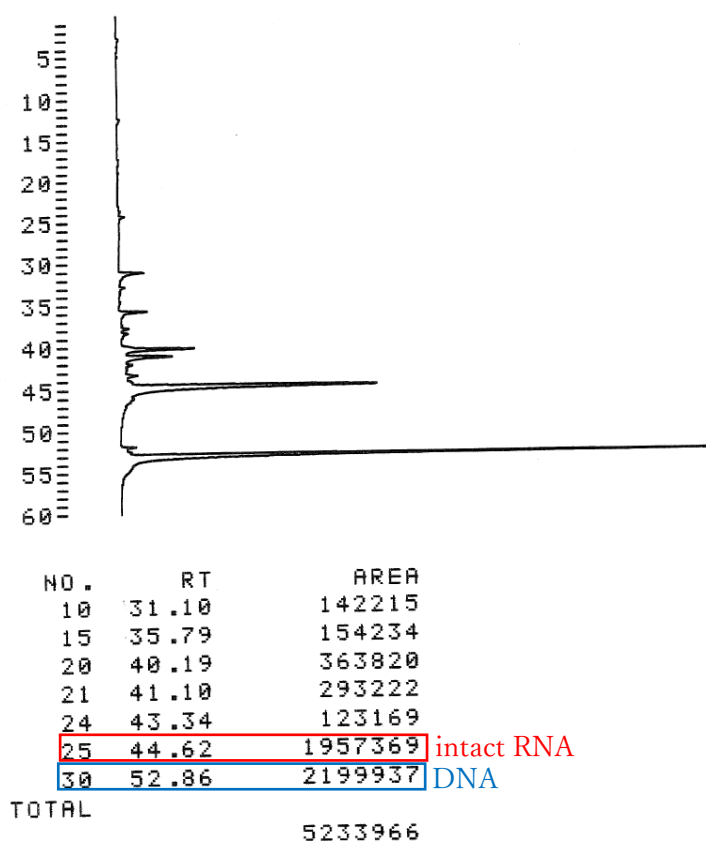

**Figure S112** RP-HPLC profile of the mixture of a 12mer DNA (D10) and a 24mer RNA (R2) in the absence of ODAGal4 after treatment with RNase H for 2 min (Figure 9, Run #1). The RP-HPLC analysis (UV detection at 260 nm) was performed using a linear gradient of 0%–6% CH<sub>3</sub>CN for 45 min, followed by a linear gradient of 6%–30% for 15 min in 0.1 M AA buffer (pH 7.0) for 60 min at 50 °C with a flow rate of 0.5 mL/min.

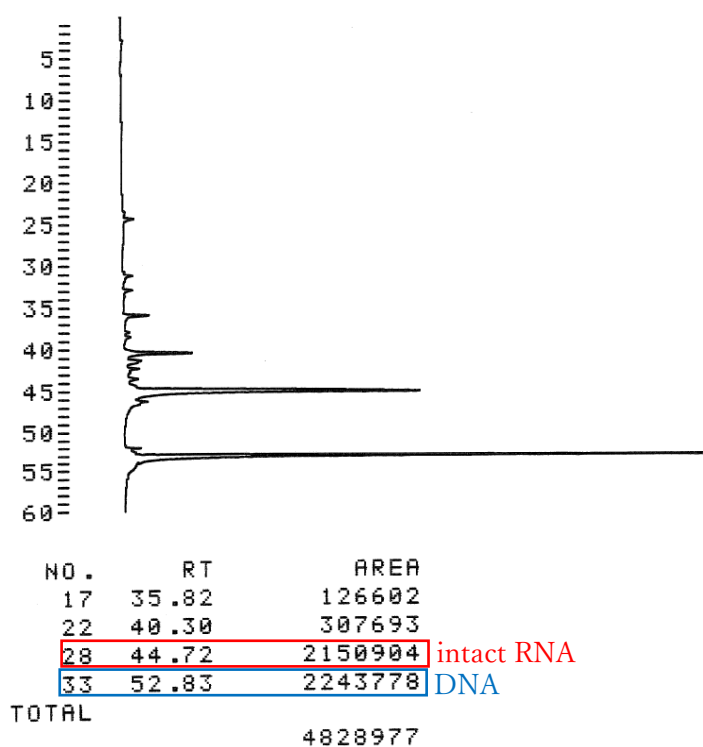

**Figure S113** RP-HPLC profile of the mixture of a 12mer DNA (D10) and a 24mer RNA (R2) in the presence of ODAGal4 after treatment with RNase H for 2 min (Figure 9, Run #1). The RP-HPLC analysis (UV detection at 260 nm) was performed using a linear gradient of 0%–6% CH<sub>3</sub>CN for 45 min, followed by a linear gradient of 6%–30% for 15 min in 0.1 M AA buffer (pH 7.0) for 60 min at 50 °C with a flow rate of 0.5 mL/min.

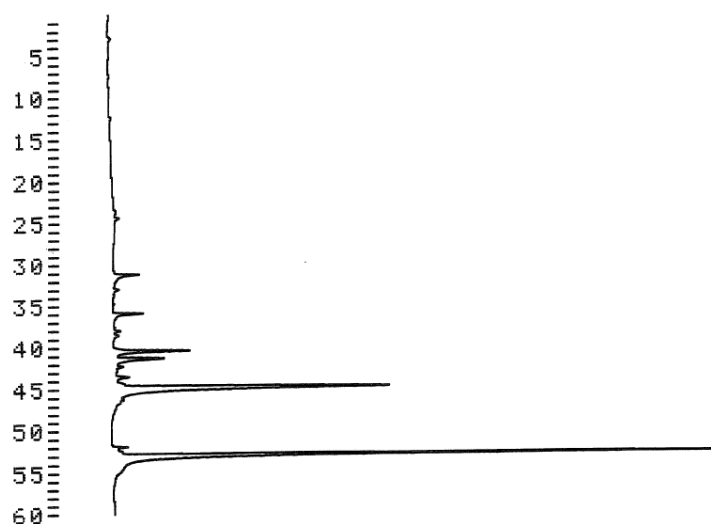

| NO.   | RT    | AREA    |            |
|-------|-------|---------|------------|
| 11    | 31.18 | 142181  |            |
| 16    | 35.92 | 150686  |            |
| 21    | 40.40 | 341585  |            |
| 22    | 41.31 | 268216  |            |
| 25    | 43.55 | 103499  |            |
| 26    | 44.80 | 1998062 | intact RNA |
| 32    | 52.86 | 2240888 | DNA        |
| TOTAL |       | 5245117 |            |

**Figure S114** RP-HPLC profile of the mixture of a 12mer DNA (D10) and a 24mer RNA (R2) in the absence of ODAGal4 after treatment with RNase H for 2 min (Figure 9, Run #2). The RP-HPLC analysis (UV detection at 260 nm) was performed using a linear gradient of 0%–6% CH<sub>3</sub>CN for 45 min, followed by a linear gradient of 6%–30% for 15 min in 0.1 M AA buffer (pH 7.0) for 60 min at 50 °C with a flow rate of 0.5 mL/min.

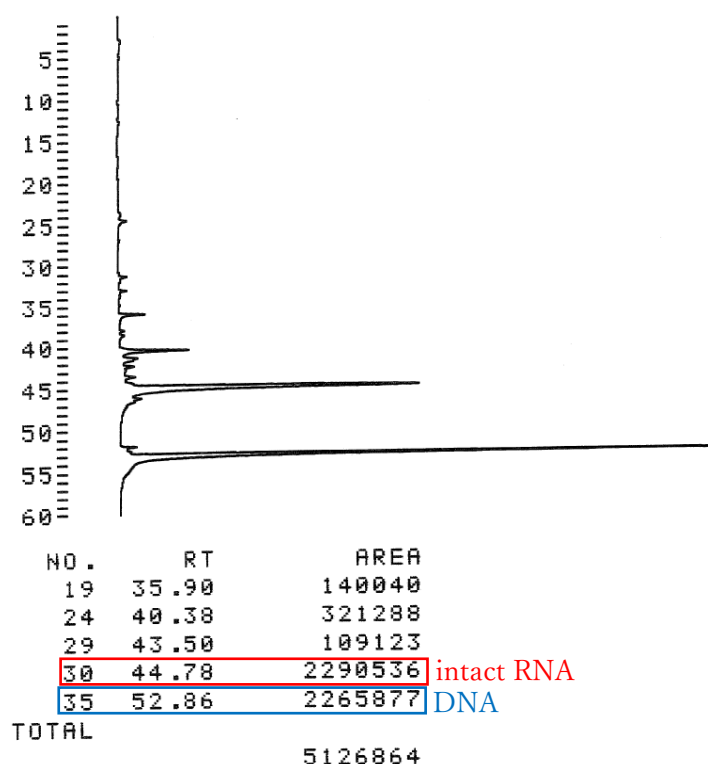

**Figure S115** RP-HPLC profile of the mixture of a 12mer DNA (D10) and a 24mer RNA (R2) in the presence of ODAGal4 after treatment with RNase H for 2 min (Figure 9, Run #2). The RP-HPLC analysis (UV detection at 260 nm) was performed using a linear gradient of 0%–6% CH<sub>3</sub>CN for 45 min, followed by a linear gradient of 6%–30% for 15 min in 0.1 M AA buffer (pH 7.0) for 60 min at 50 °C with a flow rate of 0.5 mL/min.

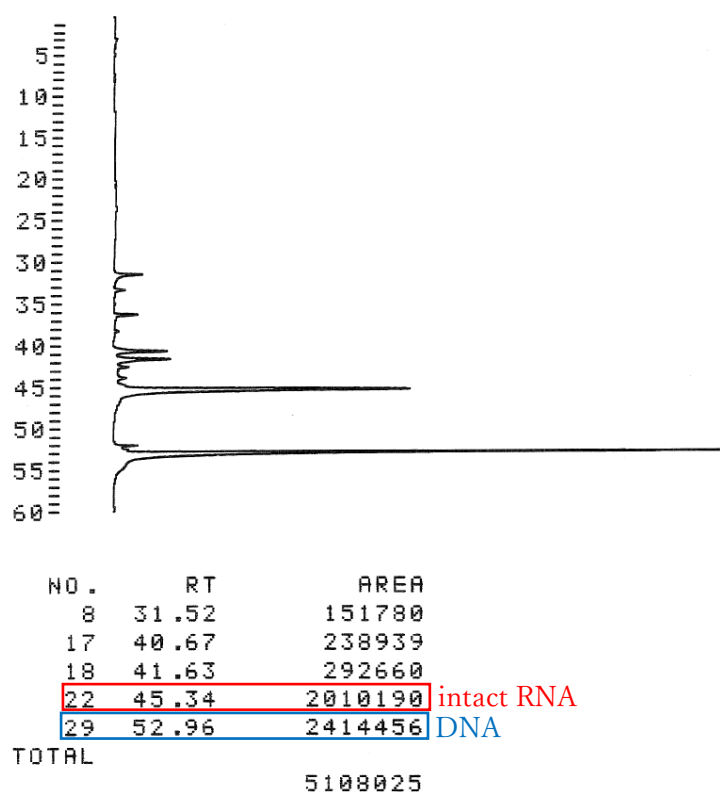

**Figure S116** RP-HPLC profile of the mixture of a 12mer DNA (D10) and a 24mer RNA (R2) in the absence of ODAGal4 after treatment with RNase H for 2 min (Figure 9, Run #3). The RP-HPLC analysis (UV detection at 260 nm) was performed using a linear gradient of 0%–6% CH<sub>3</sub>CN for 45 min, followed by a linear gradient of 6%–30% for 15 min in 0.1 M AA buffer (pH 7.0) for 60 min at 50 °C with a flow rate of 0.5 mL/min.

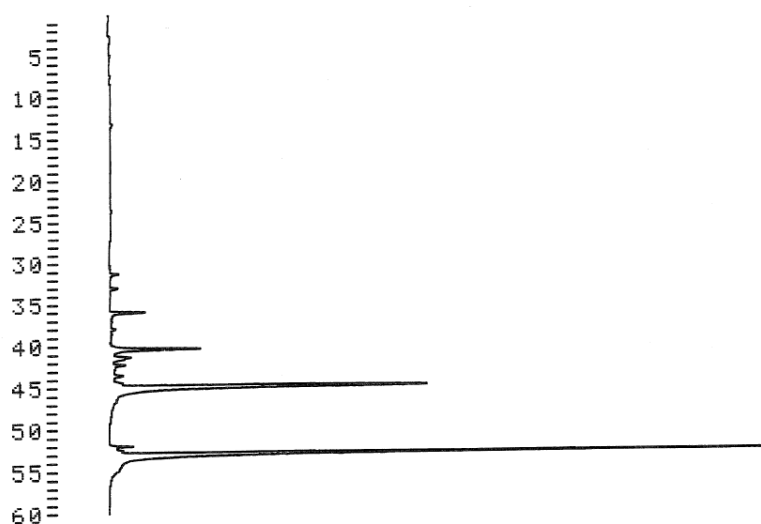

| NO.   | RT    | AREA    |
|-------|-------|---------|
| 14    | 36.00 | 182341  |
| 19    | 40.35 | 414254  |
| 22    | 42.24 | 115132  |
| 24    | 43.52 | 114692  |
| 25    | 44.88 | 2271940 |
| 32    | 52.88 | 2450244 |
| TOTAL |       | 5548603 |

intact RNA

DNA

**Figure S117** RP-HPLC profile of the mixture of a 12mer DNA (D10) and a 24mer RNA (R2) in the presence of ODAGal4 after treatment with RNase H for 2 min (Figure 9, Run #3). The RP-HPLC analysis (UV detection at 260 nm) was performed using a linear gradient of 0%–6% CH<sub>3</sub>CN for 45 min, followed by a linear gradient of 6%–30% for 15 min in 0.1 M AA buffer (pH 7.0) for 60 min at 50 °C with a flow rate of 0.5 mL/min.

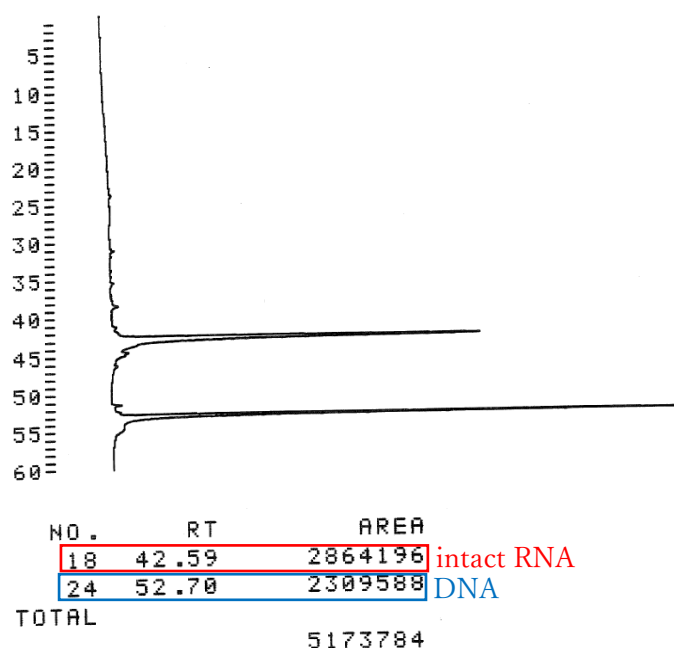

**Figure S118** RP-HPLC profile of the mixture of a 12mer DNA (D10) and a 24mer RNA (R3), which was used for the calculation of the amount of the cleaved RNA in Figure S120 and S121. The RP-HPLC analysis (UV detection at 260 nm) was performed using a linear gradient of 0%–6% CH<sub>3</sub>CN for 45 min, followed by a linear gradient of 6%–30% for 15 min in 0.1 M AA buffer (pH 7.0) for 60 min at 50 °C with a flow rate of 0.5 mL/min.

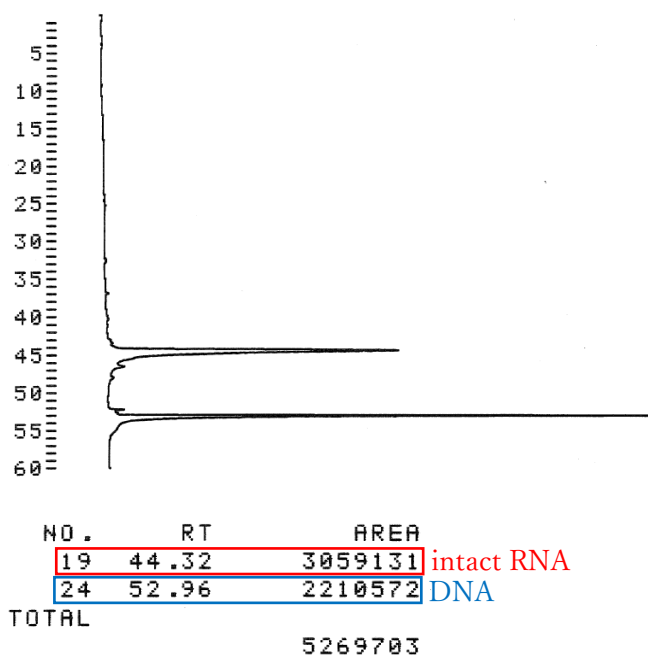

**Figure S119** RP-HPLC profile of the mixture of a 12mer DNA (D10) and a 24mer RNA (R3), which was used for the calculation of the amount of the cleaved RNA in Figure S122–S125. The RP-HPLC analysis (UV detection at 260 nm) was performed using a linear gradient of 0%–6% CH<sub>3</sub>CN for 45 min, followed by a linear gradient of 6%–30% for 15 min in 0.1 M AA buffer (pH 7.0) for 60 min at 50 °C with a flow rate of 0.5 mL/min.

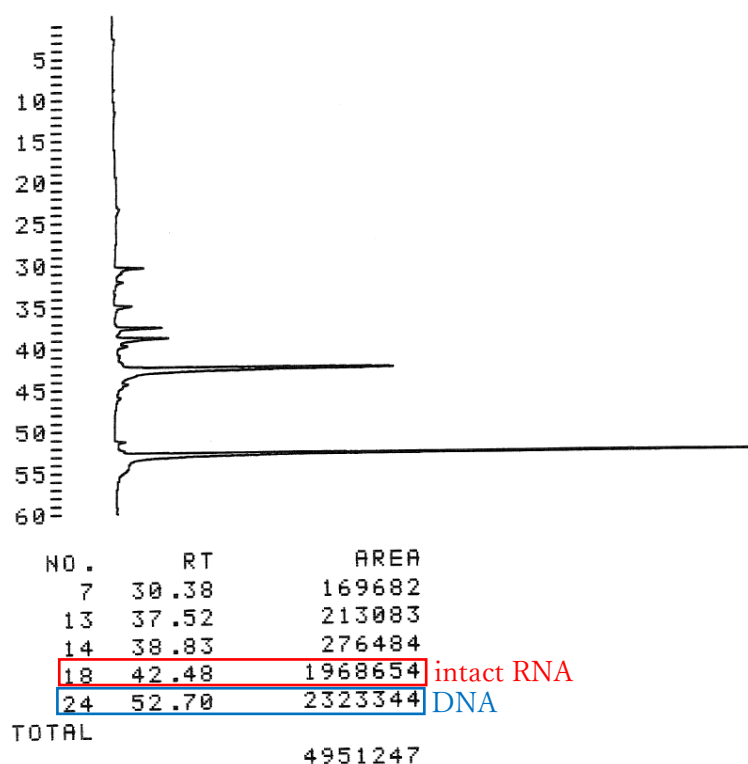

**Figure S120** RP-HPLC profile of the mixture of a 12mer DNA (D10) and a 24mer RNA (R3) in the absence of ODAGal4 after treatment with RNase H for 2 min (Figure 9, Run #1). The RP-HPLC analysis (UV detection at 260 nm) was performed using a linear gradient of 0%–6% CH<sub>3</sub>CN for 45 min, followed by a linear gradient of 6%–30% for 15 min in 0.1 M AA buffer (pH 7.0) for 60 min at 50 °C with a flow rate of 0.5 mL/min.

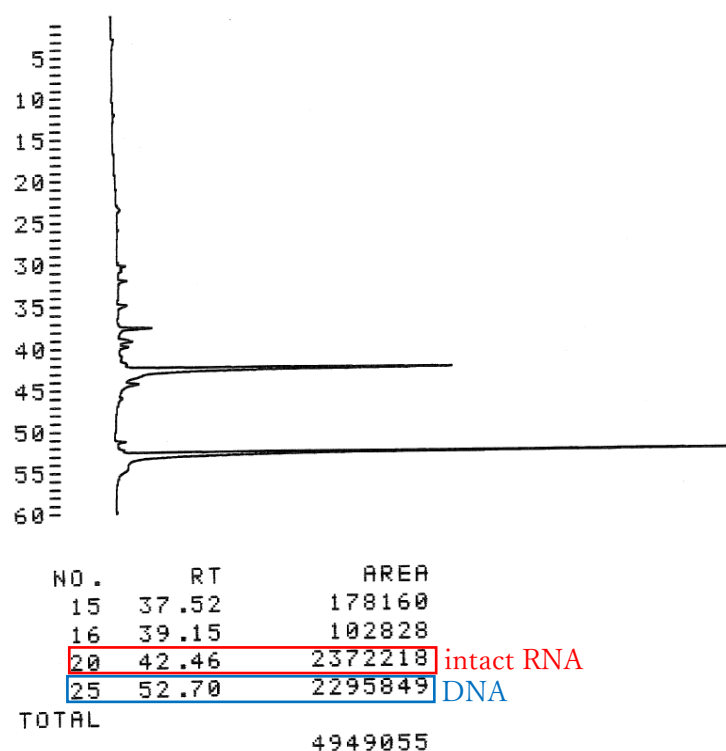

**Figure S121** RP-HPLC profile of the mixture of a 12mer DNA (D10) and a 24mer RNA (R3) in the presence of ODAGal4 after treatment with RNase H for 2 min (Figure 9, Run #1). The RP-HPLC analysis (UV detection at 260 nm) was performed using a linear gradient of 0%–6% CH<sub>3</sub>CN for 45 min, followed by a linear gradient of 6%–30% for 15 min in 0.1 M AA buffer (pH 7.0) for 60 min at 50 °C with a flow rate of 0.5 mL/min.

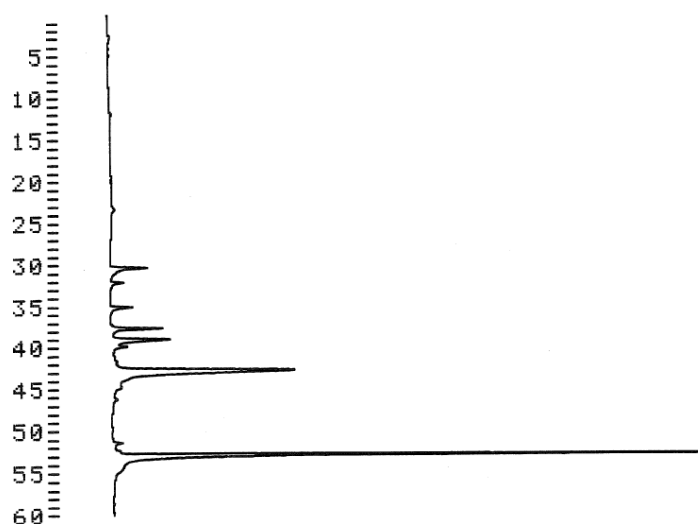

| NO.   | RT    | AREA    |
|-------|-------|---------|
| 9     | 30.32 | 197037  |
| 12    | 35.04 | 104541  |
| 13    | 37.66 | 225254  |
| 14    | 39.02 | 359867  |
| 15    | 39.87 | 105421  |
| 17    | 42.75 | 1822727 |
| 23    | 52.78 | 2088056 |
| TOTAL |       | 4902903 |

intact RNA

DNA

**Figure S122** RP-HPLC profile of the mixture of a 12mer DNA (D10) and a 24mer RNA (R3) in the absence of ODAGal4 after treatment with RNase H for 2 min (Figure 9, Run #2). The RP-HPLC analysis (UV detection at 260 nm) was performed using a linear gradient of 0%–6% CH<sub>3</sub>CN for 45 min, followed by a linear gradient of 6%–30% for 15 min in 0.1 M AA buffer (pH 7.0) for 60 min at 50 °C with a flow rate of 0.5 mL/min.

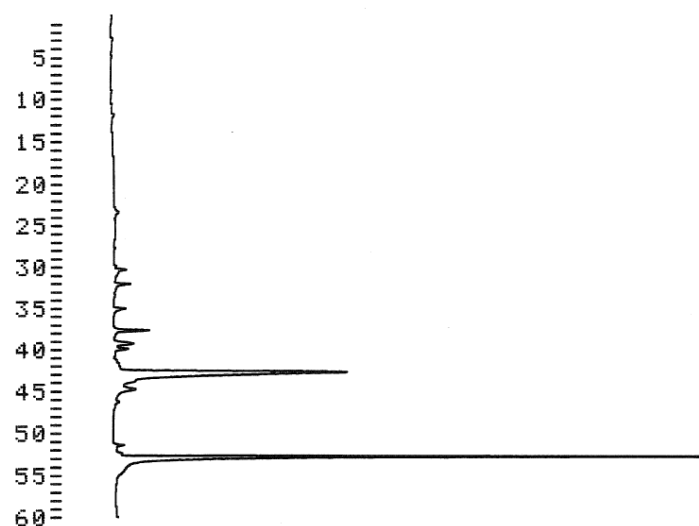

| NO.   | RT    | AREA    |
|-------|-------|---------|
| 16    | 37.71 | 157085  |
| 17    | 39.34 | 120939  |
| 21    | 42.78 | 2218028 |
| 26    | 52.78 | 2087625 |
| TOTAL |       | 4583677 |

intact RNA

DNA

**Figure S123** RP-HPLC profile of the mixture of a 12mer DNA (D10) and a 24mer RNA (R3) in the presence of ODAGal4 after treatment with RNase H for 2 min (Figure 9, Run #2). The RP-HPLC analysis (UV detection at 260 nm) was performed using a linear gradient of 0%–6% CH<sub>3</sub>CN for 45 min, followed by a linear gradient of 6%–30% for 15 min in 0.1 M AA buffer (pH 7.0) for 60 min at 50 °C with a flow rate of 0.5 mL/min.

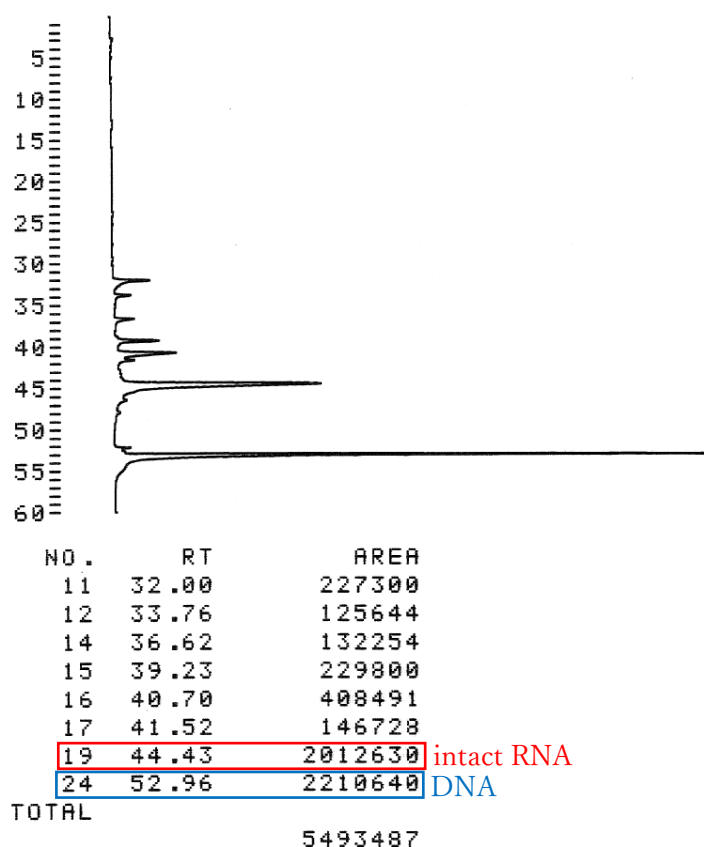

**Figure S124** RP-HPLC profile of the mixture of a 12mer DNA (D10) and a 24mer RNA (R3) in the absence of ODAGal4 after treatment with RNase H for 2 min (Figure 9, Run #3). The RP-HPLC analysis (UV detection at 260 nm) was performed using a linear gradient of 0%–6% CH<sub>3</sub>CN for 45 min, followed by a linear gradient of 6%–30% for 15 min in 0.1 M AA buffer (pH 7.0) for 60 min at 50 °C with a flow rate of 0.5 mL/min.

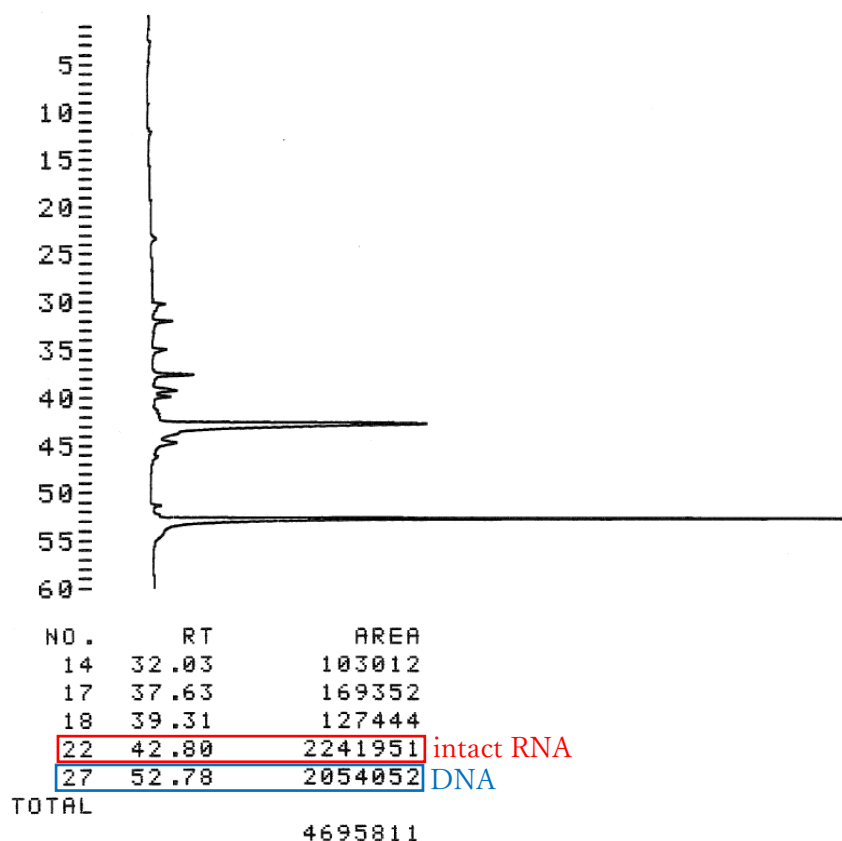

**Figure S125** RP-HPLC profile of the mixture of a 12mer DNA (D10) and a 24mer RNA (R3) in the presence of ODAGal4 after treatment with RNase H for 2 min (Figure 9, Run #3). The RP-HPLC analysis (UV detection at 260 nm) was performed using a linear gradient of 0%–6% CH<sub>3</sub>CN for 45 min, followed by a linear gradient of 6%–30% for 15 min in 0.1 M AA buffer (pH 7.0) for 60 min at 50 °C with a flow rate of 0.5 mL/min.

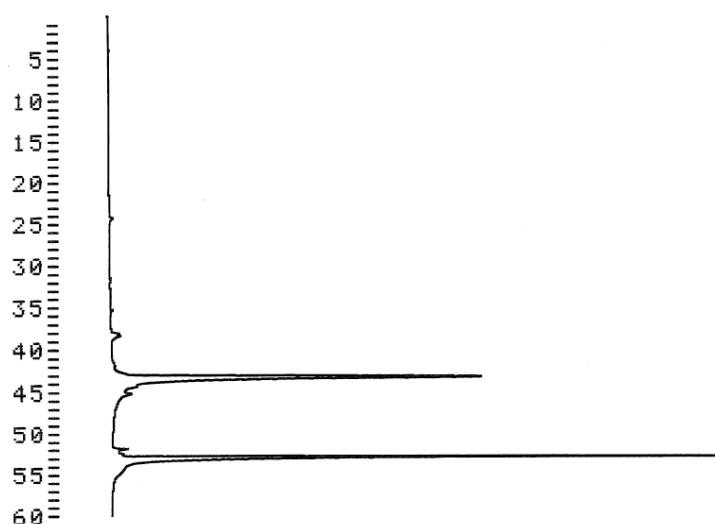

| NO.   | RT    | AREA    |            |
|-------|-------|---------|------------|
| 17    | 43.20 | 3041977 | intact RNA |
| 22    | 52.86 | 2252745 | DNA        |
| TOTAL |       | 5294722 |            |

**Figure S126** RP-HPLC profile of the mixture of a 12mer DNA (D10) and a 24mer RNA (R5). The RP-HPLC analysis (UV detection at 260 nm) was performed using a linear gradient of 0%–6% CH<sub>3</sub>CN for 45 min, followed by a linear gradient of 6%–30% for 15 min in 0.1 M AA buffer (pH 7.0) for 60 min at 50 °C with a flow rate of 0.5 mL/min.

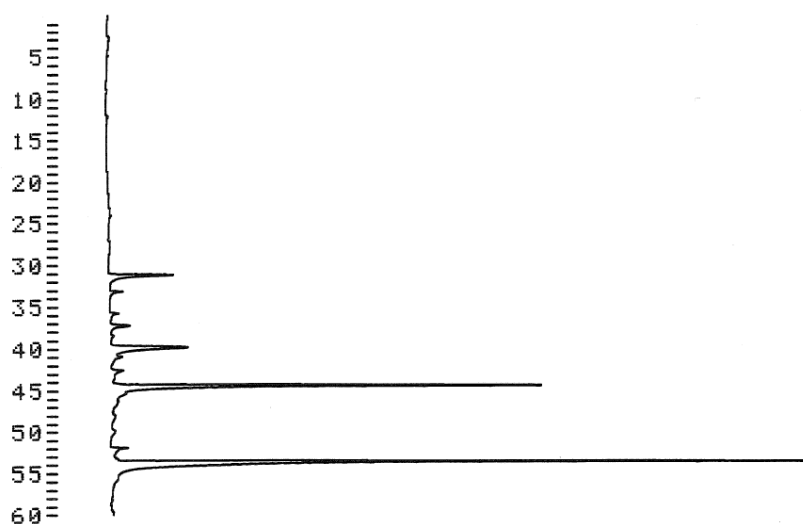

| NO.   | RT    | AREA    |
|-------|-------|---------|
| 11    | 31.20 | 318617  |
| 14    | 37.26 | 120171  |
| 16    | 39.82 | 553598  |
| 17    | 40.96 | 105617  |
| 18    | 42.56 | 134000  |
| 20    | 44.38 | 1900516 |
| 25    | 51.95 | 110692  |
| 27    | 53.58 | 2835472 |
| TOTAL |       | 6078683 |

intact RNA

DNA

**Figure S127** RP-HPLC profile of the mixture of a 12mer DNA (D10) and a 24mer RNA (R5) in the absence of ODAGal4 after treatment with RNase H for 2 min (Figure 9, Run #1). The RP-HPLC analysis (UV detection at 260 nm) was performed using a linear gradient of 0%–6% CH<sub>3</sub>CN for 45 min, followed by a linear gradient of 6%–30% for 15 min in 0.1 M AA buffer (pH 7.0) for 60 min at 50 °C with a flow rate of 0.5 mL/min.

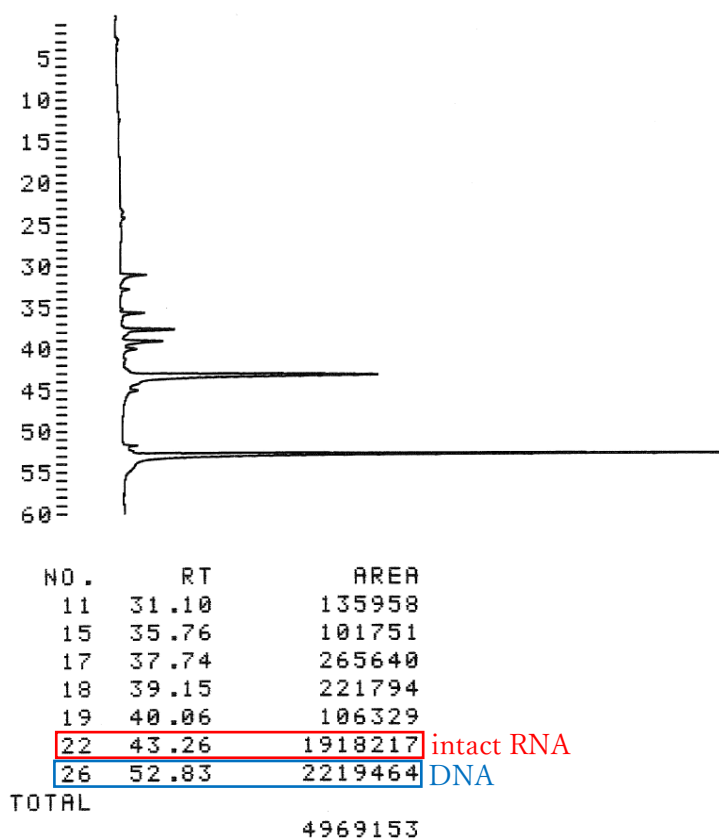

**Figure S128** RP-HPLC profile of the mixture of a 12mer DNA (D10) and a 24mer RNA (R5) in the presence of ODAGal4 after treatment with RNase H for 2 min (Figure 9, Run #1). The RP-HPLC analysis (UV detection at 260 nm) was performed using a linear gradient of 0%–6% CH<sub>3</sub>CN for 45 min, followed by a linear gradient of 6%–30% for 15 min in 0.1 M AA buffer (pH 7.0) for 60 min at 50 °C with a flow rate of 0.5 mL/min.

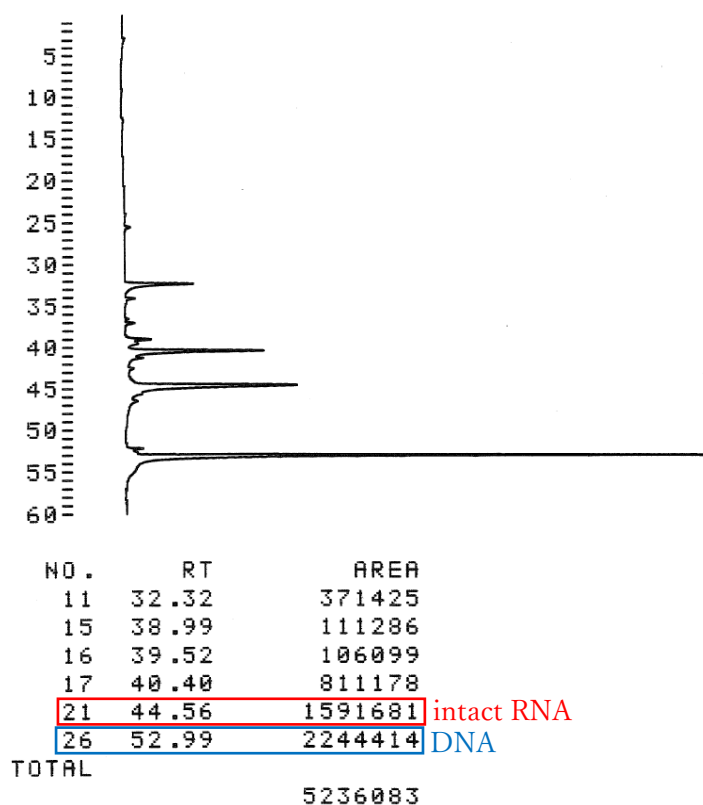

**Figure S129** RP-HPLC profile of the mixture of a 12mer DNA (D10) and a 24mer RNA (R5) in the absence of ODAGal4 after treatment with RNase H for 2 min (Figure 9, Run #2). The RP-HPLC analysis (UV detection at 260 nm) was performed using a linear gradient of 0%–6% CH<sub>3</sub>CN for 45 min, followed by a linear gradient of 6%–30% for 15 min in 0.1 M AA buffer (pH 7.0) for 60 min at 50 °C with a flow rate of 0.5 mL/min.

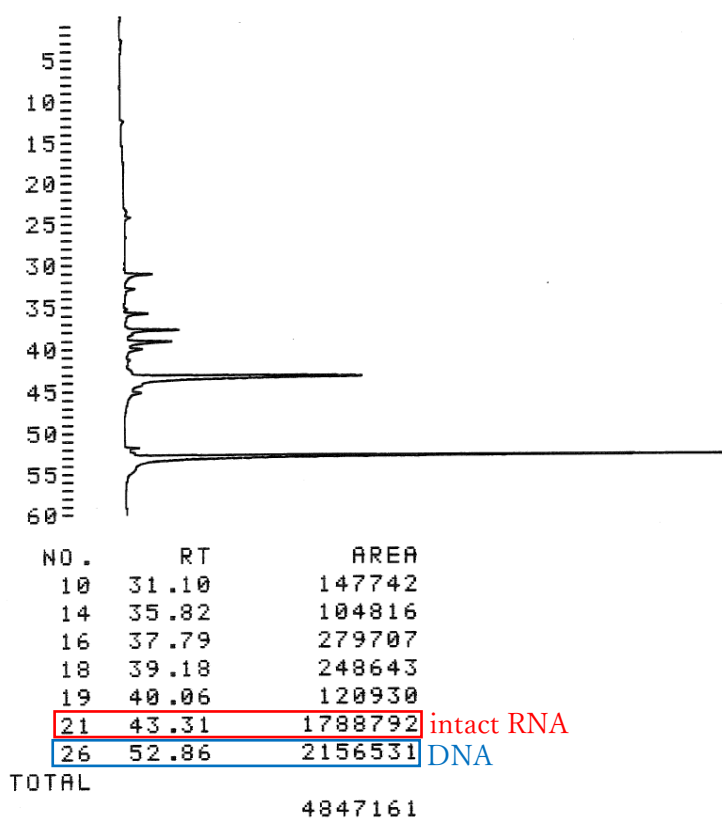

**Figure S130** RP-HPLC profile of the mixture of a 12mer DNA (D10) and a 24mer RNA (R5) in the presence of ODAGal4 after treatment with RNase H for 2 min (Figure 9, Run #2). The RP-HPLC analysis (UV detection at 260 nm) was performed using a linear gradient of 0%–6% CH<sub>3</sub>CN for 45 min, followed by a linear gradient of 6%–30% for 15 min in 0.1 M AA buffer (pH 7.0) for 60 min at 50 °C with a flow rate of 0.5 mL/min.

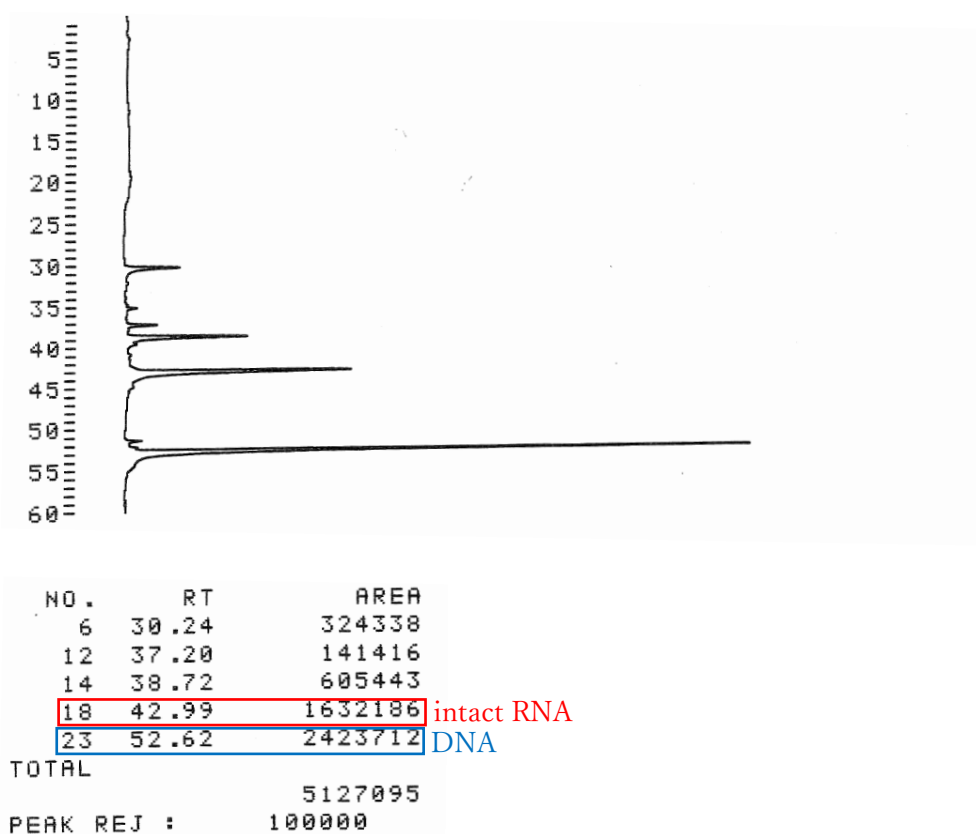

**Figure S131** RP-HPLC profile of the mixture of a 12mer DNA (D10) and a 24mer RNA (R5) in the absence of ODAGal4 after treatment with RNase H for 2 min (Figure 9, Run #3). The RP-HPLC analysis (UV detection at 260 nm) was performed using a linear gradient of 0%–6% CH<sub>3</sub>CN for 45 min, followed by a linear gradient of 6%–30% for 15 min in 0.1 M AA buffer (pH 7.0) for 60 min at 50 °C with a flow rate of 0.5 mL/min.

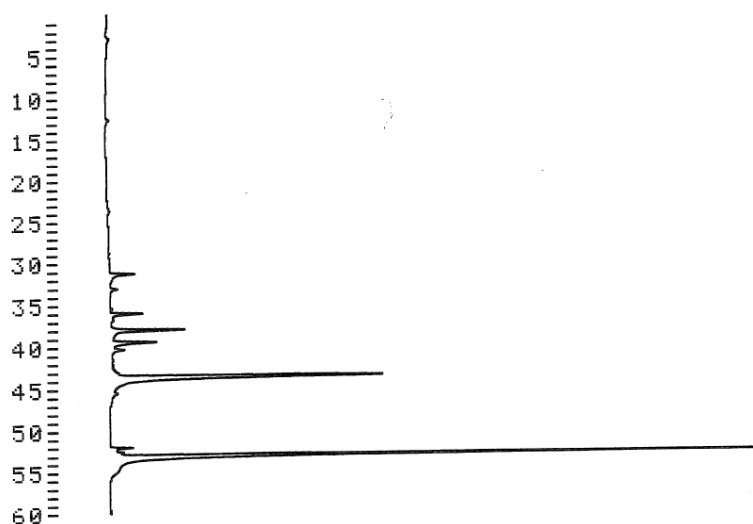

| NO.   | RT    | AREA    |
|-------|-------|---------|
| 5     | 31.26 | 140669  |
| 9     | 36.00 | 167864  |
| 11    | 37.95 | 357900  |
| 12    | 39.39 | 245886  |
| 13    | 40.27 | 121309  |
| 16    | 43.55 | 1895415 |
| 22    | 52.91 | 2332050 |
| TOTAL |       | 5261093 |

intact RNA

DNA

**Figure S132** RP-HPLC profile of the mixture of a 12mer DNA (D10) and a 24mer RNA (R5) in the presence of ODAGal4 after treatment with RNase H for 2 min (Figure 9, Run #3). The RP-HPLC analysis (UV detection at 260 nm) was performed using a linear gradient of 0%–6% CH<sub>3</sub>CN for 45 min, followed by a linear gradient of 6%–30% for 15 min in 0.1 M AA buffer (pH 7.0) for 60 min at 50 °C with a flow rate of 0.5 mL/min.

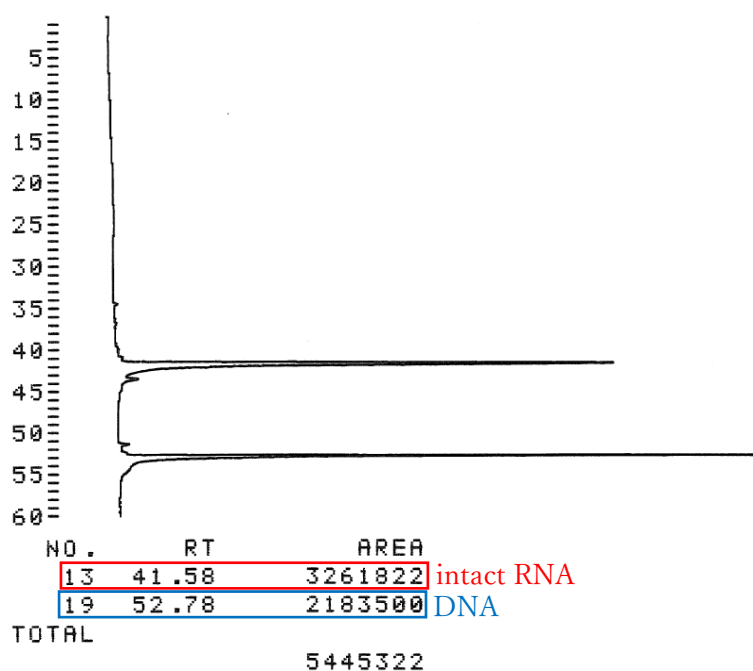

**Figure S133** RP-HPLC profile of the mixture of a 12mer DNA (D10) and a 24mer RNA (R7). The RP-HPLC analysis (UV detection at 260 nm) was performed using a linear gradient of 0%–6% CH<sub>3</sub>CN for 45 min, followed by a linear gradient of 6%–30% for 15 min in 0.1 M AA buffer (pH 7.0) for 60 min at 50 °C with a flow rate of 0.5 mL/min.

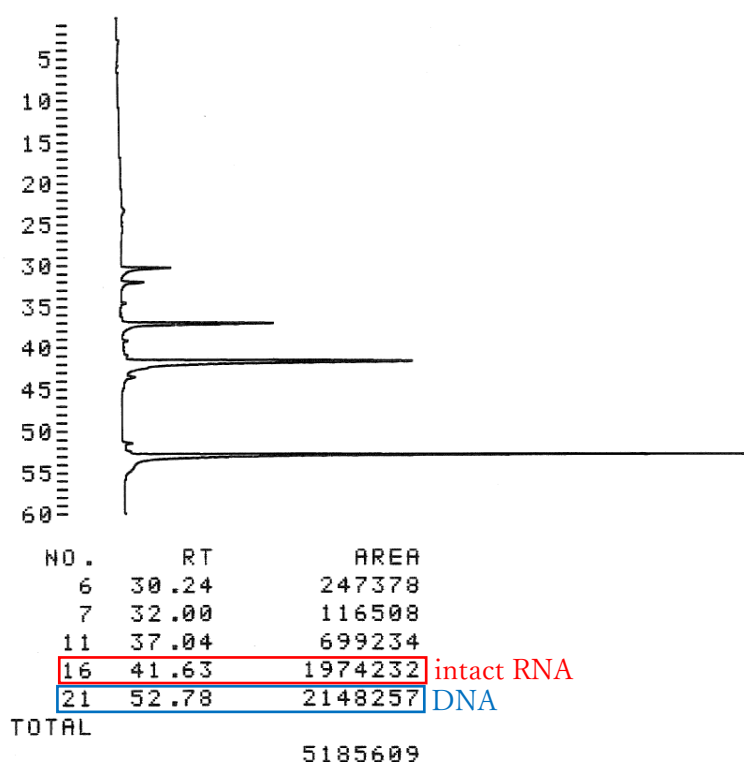

**Figure S134** RP-HPLC profile of the mixture of a 12mer DNA (D10) and a 24mer RNA (R7) in the absence of ODAGal4 after treatment with RNase H for 2 min (Figure 9, Run #1). The RP-HPLC analysis (UV detection at 260 nm) was performed using a linear gradient of 0%–6% CH<sub>3</sub>CN for 45 min, followed by a linear gradient of 6%–30% for 15 min in 0.1 M AA buffer (pH 7.0) for 60 min at 50 °C with a flow rate of 0.5 mL/min.

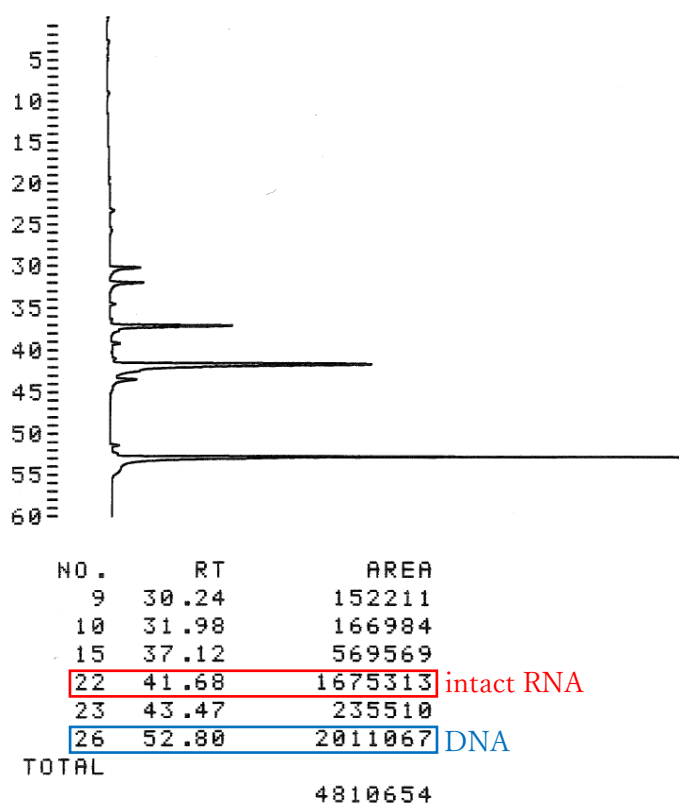

**Figure S135** RP-HPLC profile of the mixture of a 12mer DNA (D10) and a 24mer RNA (R7) in the presence of ODAGal4 after treatment with RNase H for 2 min (Figure 9, Run #1). The RP-HPLC analysis (UV detection at 260 nm) was performed using a linear gradient of 0%–6% CH<sub>3</sub>CN for 45 min, followed by a linear gradient of 6%–30% for 15 min in 0.1 M AA buffer (pH 7.0) for 60 min at 50 °C with a flow rate of 0.5 mL/min.

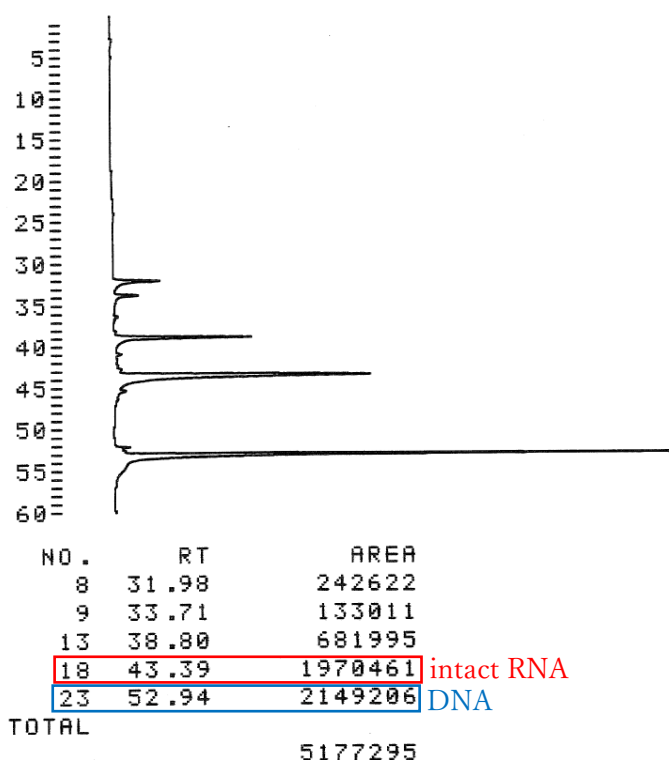

**Figure S136** RP-HPLC profile of the mixture of a 12mer DNA (D10) and a 24mer RNA (R7) in the absence of ODAGal4 after treatment with RNase H for 2 min (Figure 9, Run #2). The RP-HPLC analysis (UV detection at 260 nm) was performed using a linear gradient of 0%–6% CH<sub>3</sub>CN for 45 min, followed by a linear gradient of 6%–30% for 15 min in 0.1 M AA buffer (pH 7.0) for 60 min at 50 °C with a flow rate of 0.5 mL/min.

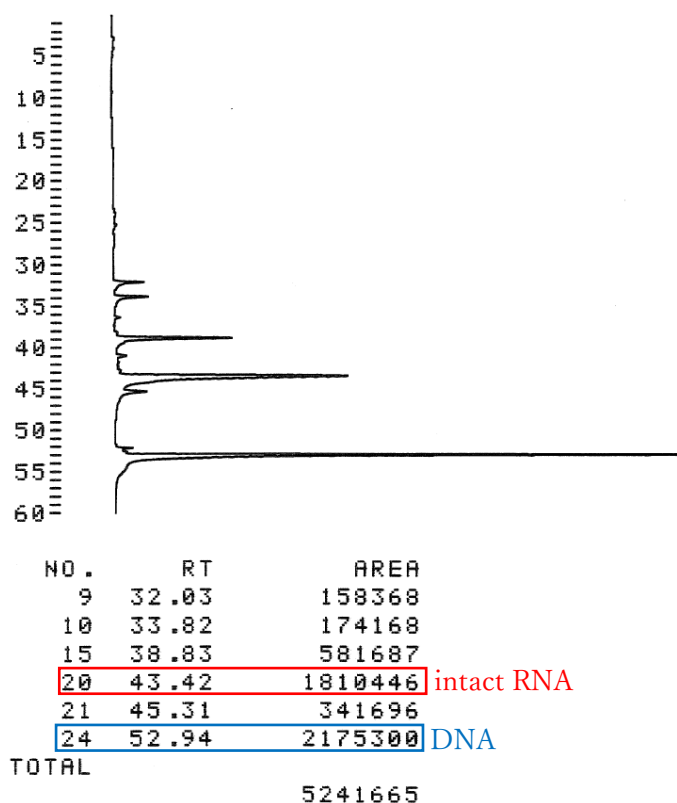

**Figure S137** RP-HPLC profile of the mixture of a 12mer DNA (D10) and a 24mer RNA (R7) in the presence of ODAGal4 after treatment with RNase H for 2 min (Figure 9, Run #2). The RP-HPLC analysis (UV detection at 260 nm) was performed using a linear gradient of 0%–6% CH<sub>3</sub>CN for 45 min, followed by a linear gradient of 6%–30% for 15 min in 0.1 M AA buffer (pH 7.0) for 60 min at 50 °C with a flow rate of 0.5 mL/min.

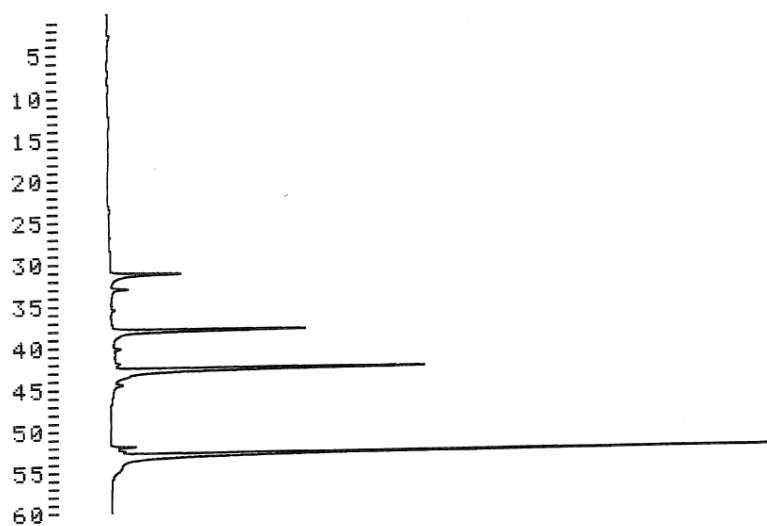

| NO.   | RT    | AREA    |
|-------|-------|---------|
| 10    | 31.28 | 362856  |
| 11    | 33.04 | 117400  |
| 15    | 38.08 | 926599  |
| 21    | 42.75 | 1918227 |
| 28    | 52.91 | 2386792 |
| TOTAL |       | 5711874 |

intact RNA

DNA

**Figure S138** RP-HPLC profile of the mixture of a 12mer DNA (D10) and a 24mer RNA (R7) in the absence of ODAGal4 after treatment with RNase H for 2 min (Figure 9, Run #3). The RP-HPLC analysis (UV detection at 260 nm) was performed using a linear gradient of 0%–6% CH<sub>3</sub>CN for 45 min, followed by a linear gradient of 6%–30% for 15 min in 0.1 M AA buffer (pH 7.0) for 60 min at 50 °C with a flow rate of 0.5 mL/min.

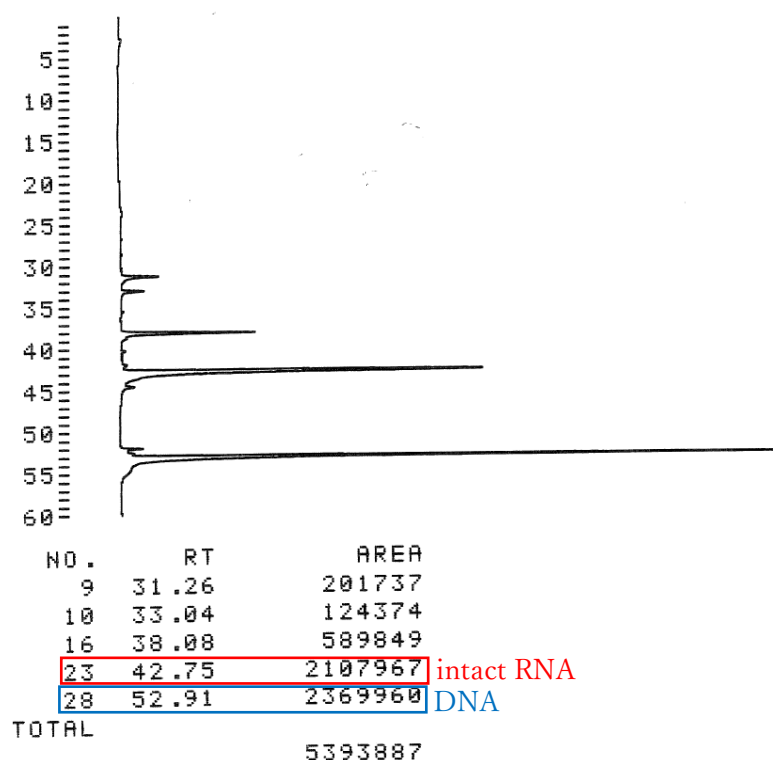

**Figure S139** RP-HPLC profile of the mixture of a 12mer DNA (D10) and a 24mer RNA (R7) in the presence of ODAGal4 after treatment with RNase H for 2 min (Figure 9, Run #3). The RP-HPLC analysis (UV detection at 260 nm) was performed using a linear gradient of 0%–6% CH<sub>3</sub>CN for 45 min, followed by a linear gradient of 6%–30% for 15 min in 0.1 M AA buffer (pH 7.0) for 60 min at 50 °C with a flow rate of 0.5 mL/min.

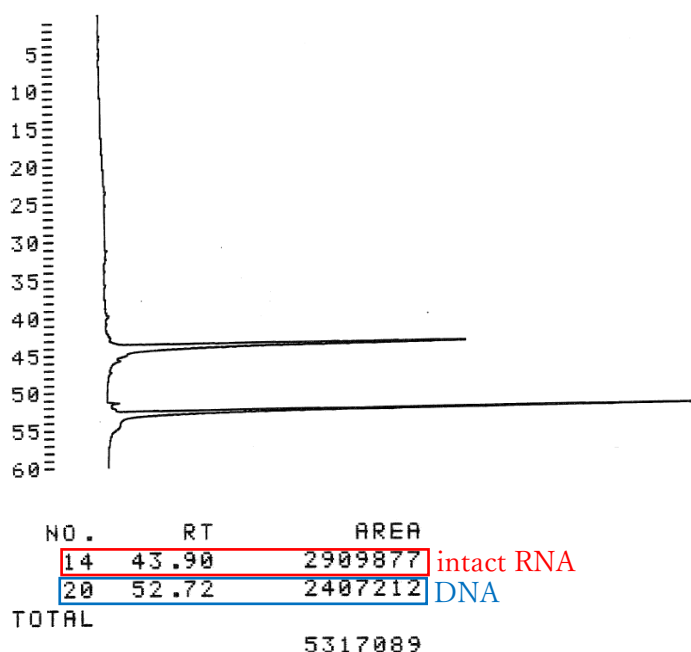

**Figure S140** RP-HPLC profile of the mixture of a 12mer DNA (D10) and a 24mer RNA (R9), which was used for the calculation of the amount of the cleaved RNA in Figure S142 and S143. The RP-HPLC analysis (UV detection at 260 nm) was performed using a linear gradient of 0%–6% CH<sub>3</sub>CN for 45 min, followed by a linear gradient of 6%–30% for 15 min in 0.1 M AA buffer (pH 7.0) for 60 min at 50 °C with a flow rate of 0.5 mL/min.

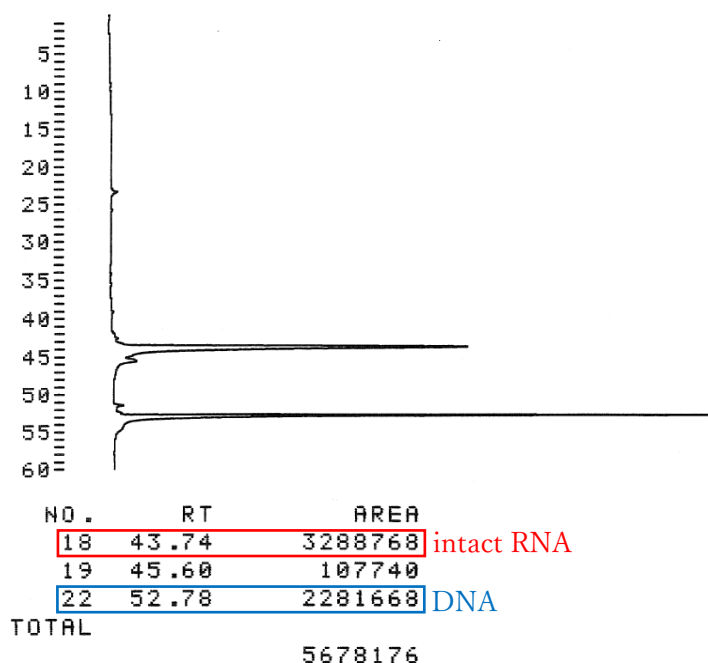

**Figure S141** RP-HPLC profile of the mixture of a 12mer DNA (D10) and a 24mer RNA (R9), which was used for the calculation of the amount of the cleaved RNA in Figure S144–S147. The RP-HPLC analysis (UV detection at 260 nm) was performed using a linear gradient of 0%–6% CH<sub>3</sub>CN for 45 min, followed by a linear gradient of 6%–30% for 15 min in 0.1 M AA buffer (pH 7.0) for 60 min at 50 °C with a flow rate of 0.5 mL/min.

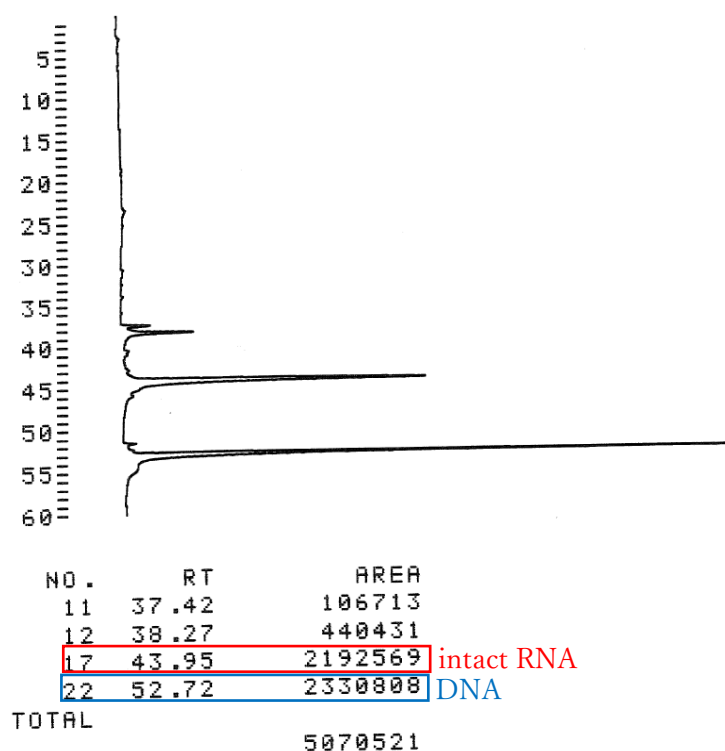

intact RNA  
DNA

**Figure S142** RP-HPLC profile of the mixture of a 12mer DNA (D10) and a 24mer RNA (R9) in the absence of ODAGal4 after treatment with RNase H for 2 min (Figure 9, Run #1). The RP-HPLC analysis (UV detection at 260 nm) was performed using a linear gradient of 0%–6% CH<sub>3</sub>CN for 45 min, followed by a linear gradient of 6%–30% for 15 min in 0.1 M AA buffer (pH 7.0) for 60 min at 50 °C with a flow rate of 0.5 mL/min.

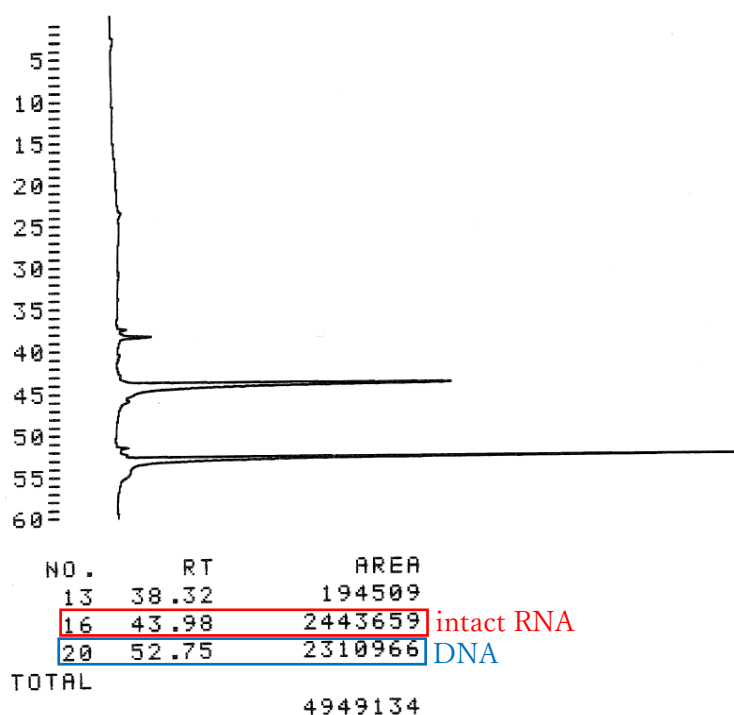

**Figure S143** RP-HPLC profile of the mixture of a 12mer DNA (D10) and a 24mer RNA (R9) in the presence of ODAGal4 after treatment with RNase H for 2 min (Figure 9, Run #1). The RP-HPLC analysis (UV detection at 260 nm) was performed using a linear gradient of 0%–6% CH<sub>3</sub>CN for 45 min, followed by a linear gradient of 6%–30% for 15 min in 0.1 M AA buffer (pH 7.0) for 60 min at 50 °C with a flow rate of 0.5 mL/min.

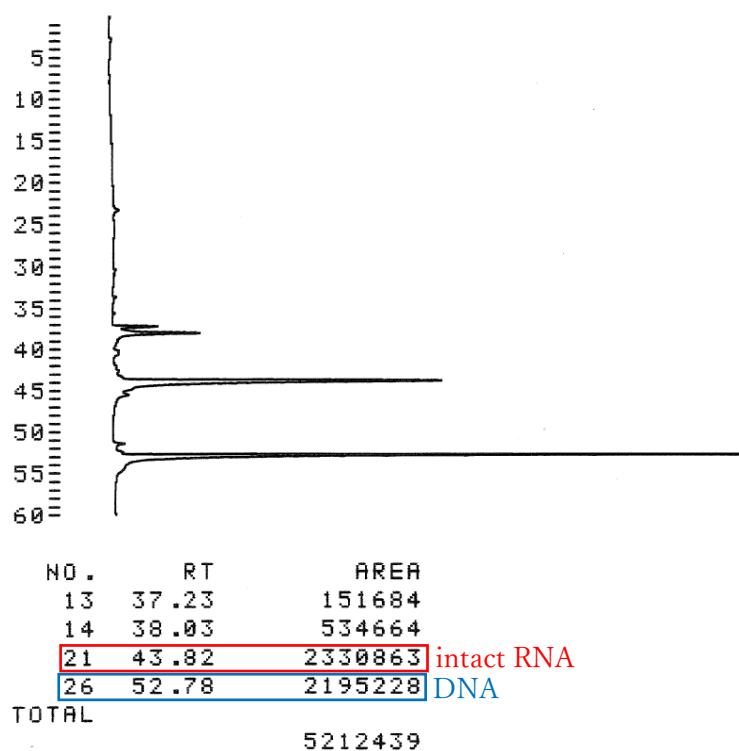

**Figure S144** RP-HPLC profile of the mixture of a 12mer DNA (D10) and a 24mer RNA (R9) in the absence of ODAGal4 after treatment with RNase H for 2 min (Figure 9, Run #2). The RP-HPLC analysis (UV detection at 260 nm) was performed using a linear gradient of 0%–6% CH<sub>3</sub>CN for 45 min, followed by a linear gradient of 6%–30% for 15 min in 0.1 M AA buffer (pH 7.0) for 60 min at 50 °C with a flow rate of 0.5 mL/min.

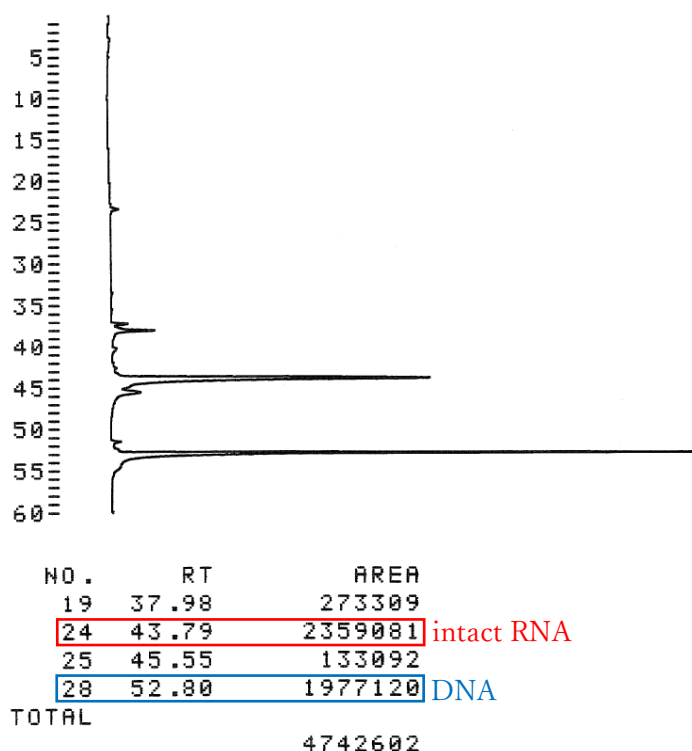

**Figure S145** RP-HPLC profile of the mixture of a 12mer DNA (D10) and a 24mer RNA (R9) in the presence of ODAGal4 after treatment with RNase H for 2 min (Figure 9, Run #2). The RP-HPLC analysis (UV detection at 260 nm) was performed using a linear gradient of 0%–6% CH<sub>3</sub>CN for 45 min, followed by a linear gradient of a linear gradient of 6%–30% for 15 min in 0.1 M AA buffer (pH 7.0) for 60 min at 50 °C with a flow rate of 0.5 mL/min.

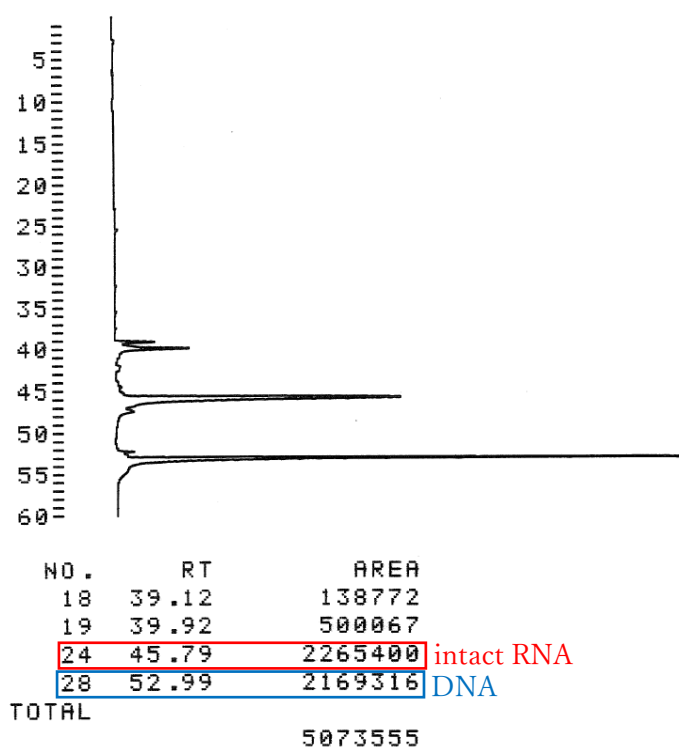

**Figure S146** RP-HPLC profile of the mixture of a 12mer DNA (D10) and a 24mer RNA (R9) in the absence of ODAGal4 after treatment with RNase H for 2 min (Figure 9, Run #3). The RP-HPLC analysis (UV detection at 260 nm) was performed using a linear gradient of 0%–6% CH<sub>3</sub>CN for 45 min, followed by a linear gradient of 6%–30% for 15 min in 0.1 M AA buffer (pH 7.0) for 60 min at 50 °C with a flow rate of 0.5 mL/min.

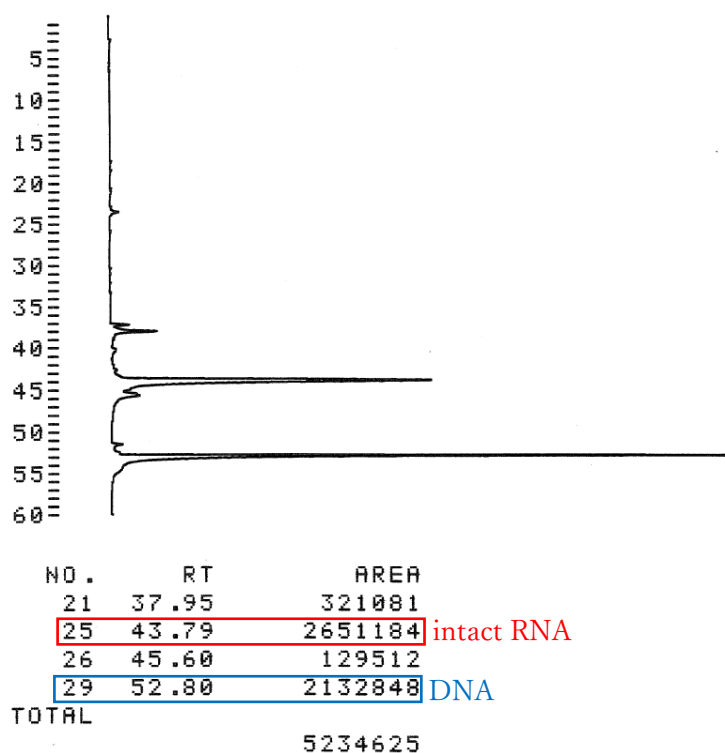

**Figure S147** RP-HPLC profile of the mixture of a 12mer DNA (D10) and a 24mer RNA (R9) in the presence of ODAGal4 after treatment with RNase H for 2 min (Figure 9, Run #3). The RP-HPLC analysis (UV detection at 260 nm) was performed using a linear gradient of 0%–6% CH<sub>3</sub>CN for 45 min, followed by a linear gradient of 6%–30% for 15 min in 0.1 M AA buffer (pH 7.0) for 60 min at 50 °C with a flow rate of 0.5 mL/min.

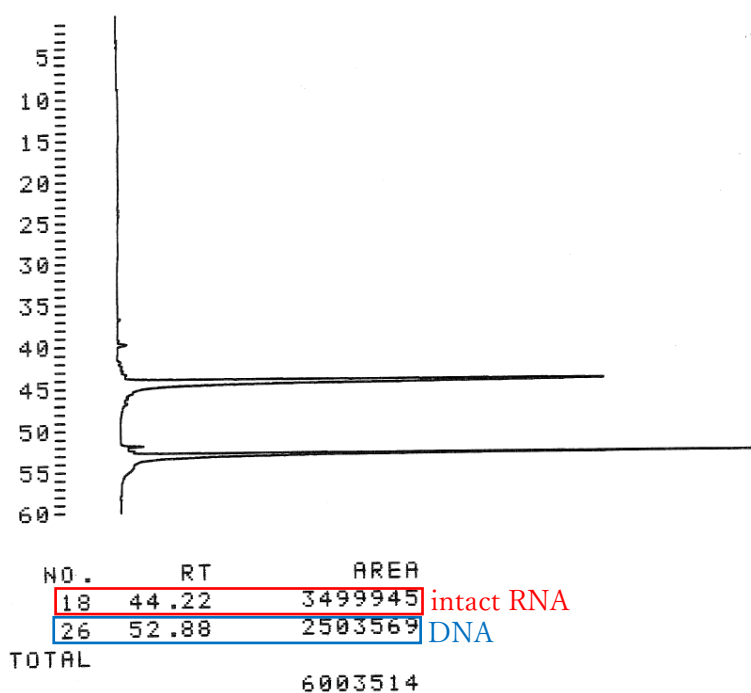

**Figure S148** RP-HPLC profile of the mixture of a 12mer DNA (D10) and a 24mer RNA (R11). The RP-HPLC analysis (UV detection at 260 nm) was performed using a linear gradient of 0%–6% CH<sub>3</sub>CN for 45 min, followed by a linear gradient of 6%–30% for 15 min in 0.1 M AA buffer (pH 7.0) for 60 min at 50 °C with a flow rate of 0.5 mL/min.

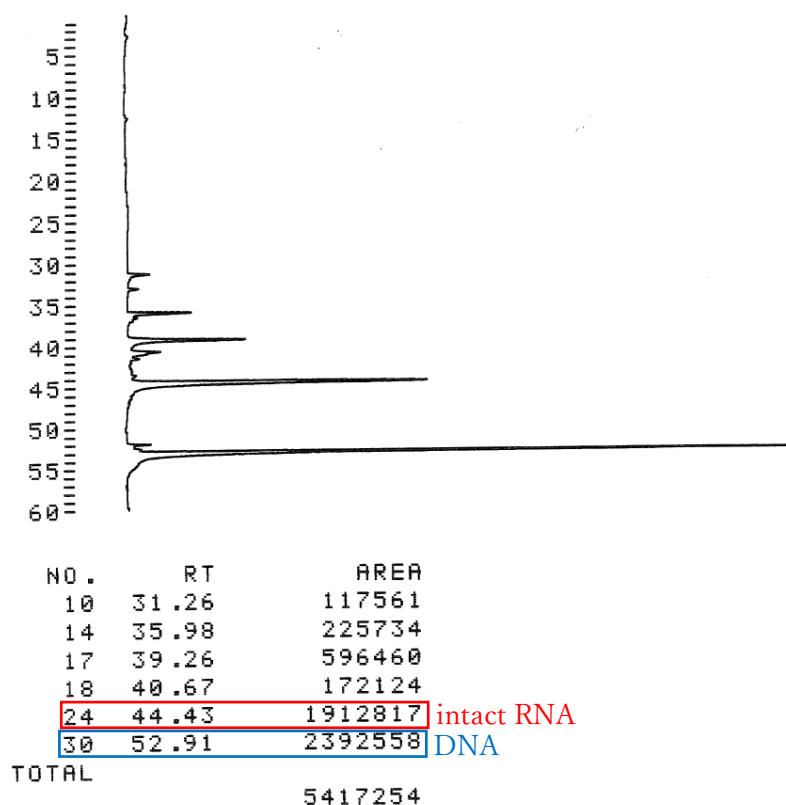

**Figure S149** RP-HPLC profile of the mixture of a 12mer DNA (D10) and a 24mer RNA (R11) in the absence of ODAGal4 after treatment with RNase H for 2 min (Figure 9, Run #1). The RP-HPLC analysis (UV detection at 260 nm) was performed using a linear gradient of 0%–6% CH<sub>3</sub>CN for 45 min, followed by a linear gradient of 6%–30% for 15 min in 0.1 M AA buffer (pH 7.0) for 60 min at 50 °C with a flow rate of 0.5 mL/min.

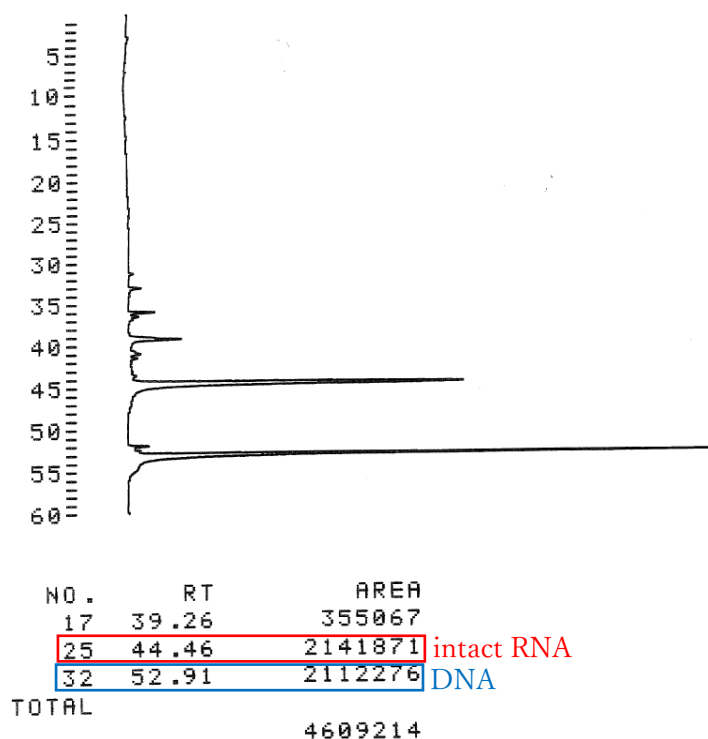

**Figure S150** RP-HPLC profile of the mixture of a 12mer DNA (D10) and a 24mer RNA (R11) in the presence of ODAGal4 after treatment with RNase H for 2 min (Figure 9, Run #1). The RP-HPLC analysis (UV detection at 260 nm) was performed using a linear gradient of 0%–6% CH<sub>3</sub>CN for 45 min, followed by a linear gradient of 6%–30% for 15 min in 0.1 M AA buffer (pH 7.0) for 60 min at 50 °C with a flow rate of 0.5 mL/min.

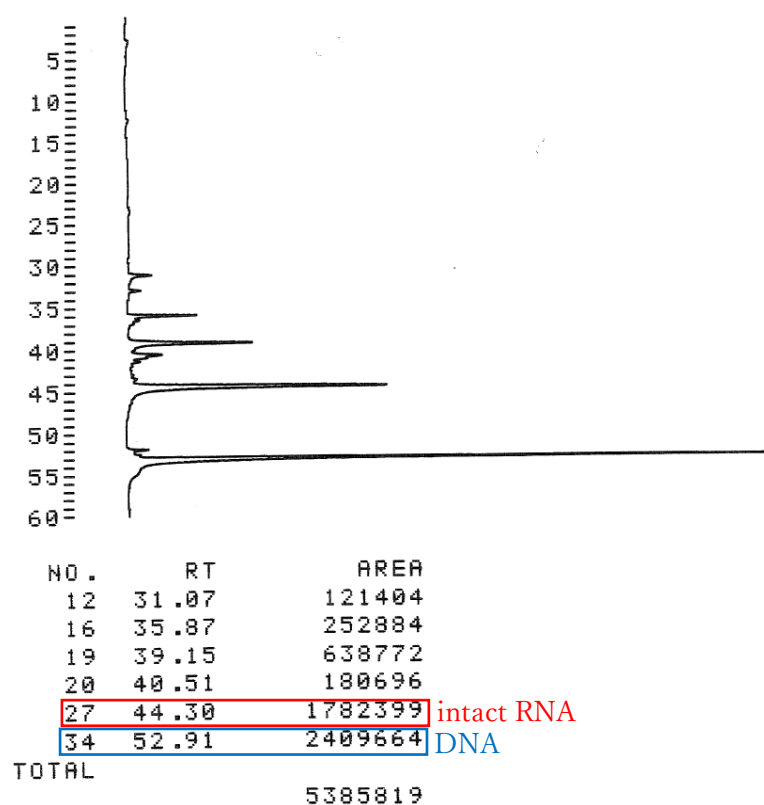

**Figure S151** RP-HPLC profile of the mixture of a 12mer DNA (D10) and a 24mer RNA (R11) in the absence of ODAGal4 after treatment with RNase H for 2 min (Figure 9, Run #2). The RP-HPLC analysis (UV detection at 260 nm) was performed using a linear gradient of 0%–6% CH<sub>3</sub>CN for 45 min, followed by a linear gradient of 6%–30% for 15 min in 0.1 M AA buffer (pH 7.0) for 60 min at 50 °C with a flow rate of 0.5 mL/min.

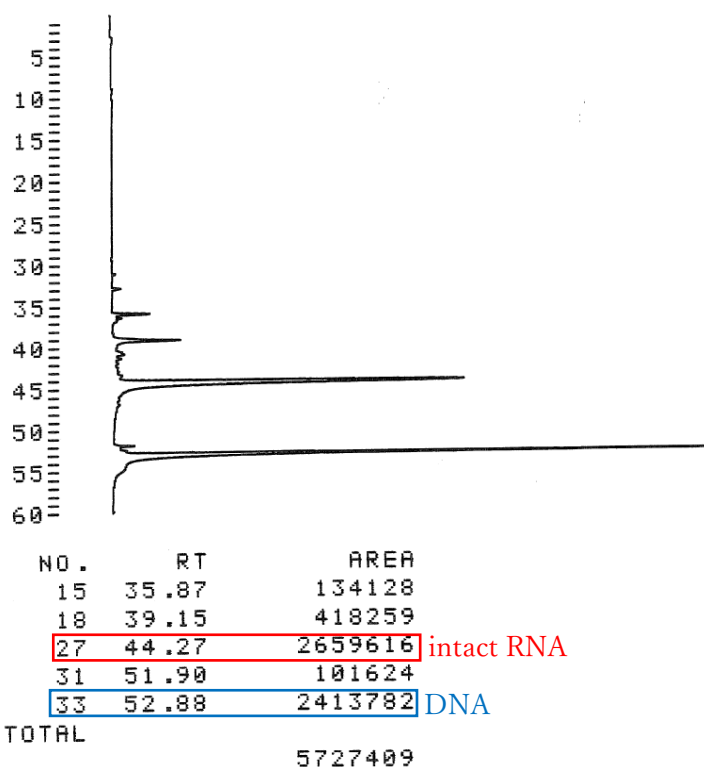

intact RNA

DNA

**Figure S152** RP-HPLC profile of the mixture of a 12mer DNA (D10) and a 24mer RNA (R11) in the presence of ODAGal4 after treatment with RNase H for 2 min (Figure 9, Run #2). The RP-HPLC analysis (UV detection at 260 nm) was performed using a linear gradient of 0%–6% CH<sub>3</sub>CN for 45 min, followed by a linear gradient of 6%–30% for 15 min in 0.1 M AA buffer (pH 7.0) for 60 min at 50 °C with a flow rate of 0.5 mL/min.

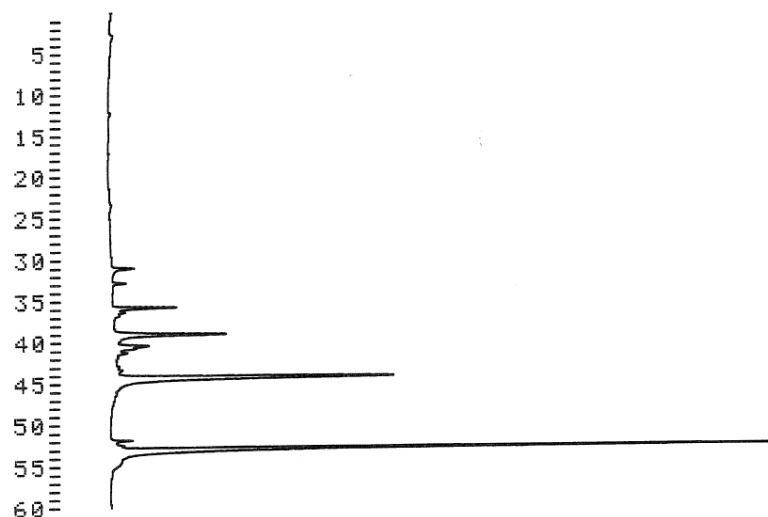

| NO.   | RT    | AREA    |
|-------|-------|---------|
| 9     | 31.04 | 135892  |
| 10    | 32.83 | 119865  |
| 13    | 35.84 | 256112  |
| 15    | 36.78 | 106781  |
| 16    | 39.12 | 661696  |
| 17    | 40.46 | 199476  |
| 18    | 40.78 | 113985  |
| 19    | 41.28 | 146186  |
| 24    | 44.32 | 2100427 |
| 31    | 52.91 | 2485680 |
| TOTAL |       | 6326100 |

intact RNA  
DNA

**Figure S153** RP-HPLC profile of the mixture of a 12mer DNA (D10) and a 24mer RNA (R11) in the absence of ODAGal4 after treatment with RNase H for 2 min (Figure 9, Run #3). The RP-HPLC analysis (UV detection at 260 nm) was performed using a linear gradient of 0%–6% CH<sub>3</sub>CN for 45 min, followed by a linear gradient of 6%–30% for 15 min in 0.1 M AA buffer (pH 7.0) for 60 min at 50 °C with a flow rate of 0.5 mL/min.

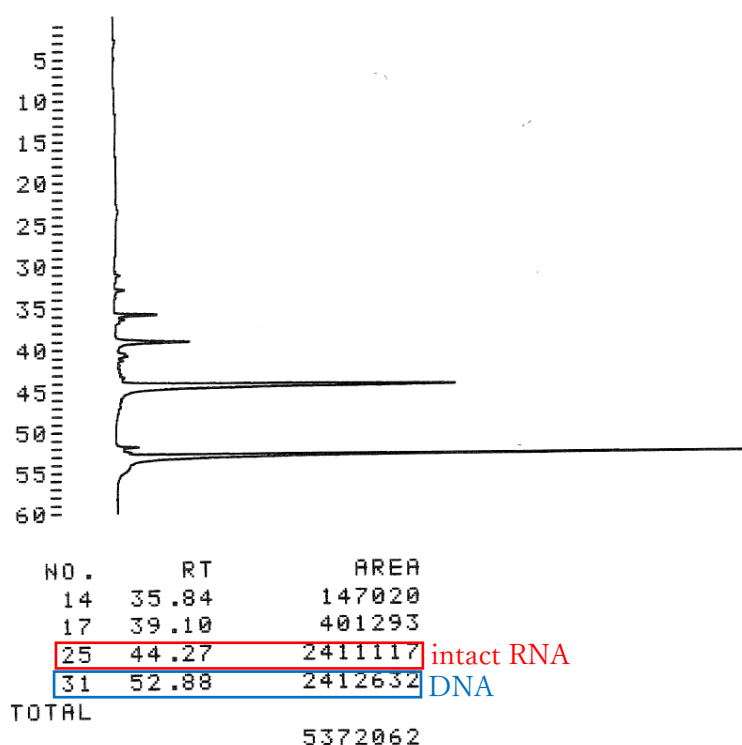

**Figure S154** RP-HPLC profile of the mixture of a 12mer DNA (D10) and a 24mer RNA (R11) in the presence of ODAGal4 after treatment with RNase H for 2 min (Figure 9, Run #3). The RP-HPLC analysis (UV detection at 260 nm) was performed using a linear gradient of 0%–6% CH<sub>3</sub>CN for 45 min, followed by a linear gradient of 6%–30% for 15 min in 0.1 M AA buffer (pH 7.0) for 60 min at 50 °C with a flow rate of 0.5 mL/min.

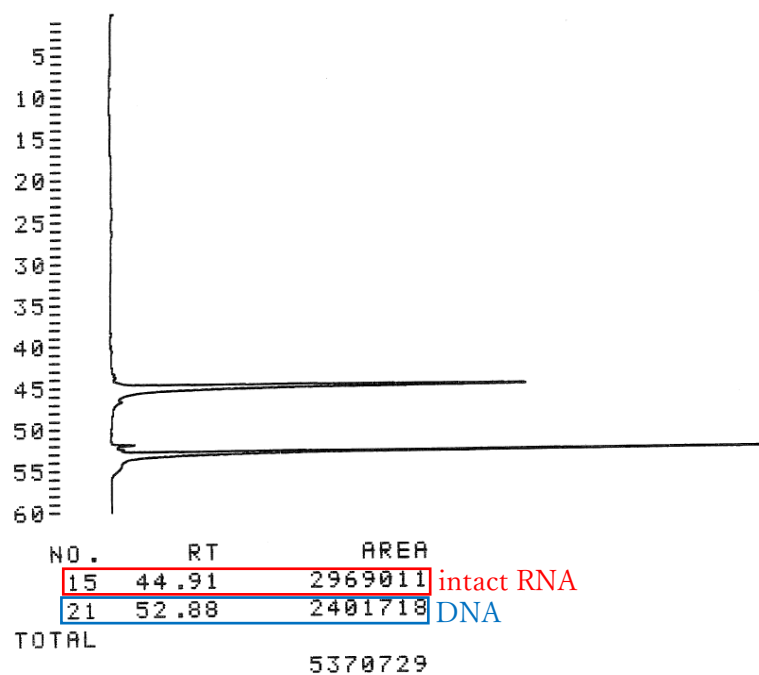

**Figure S155** RP-HPLC profile of the mixture of a 12mer DNA (D10) and a 24mer RNA (R12). The RP-HPLC analysis (UV detection at 260 nm) was performed using a linear gradient of 0%–6% CH<sub>3</sub>CN for 45 min, followed by a linear gradient of 6%–30% for 15 min in 0.1 M AA buffer (pH 7.0) for 60 min at 50 °C with a flow rate of 0.5 mL/min.

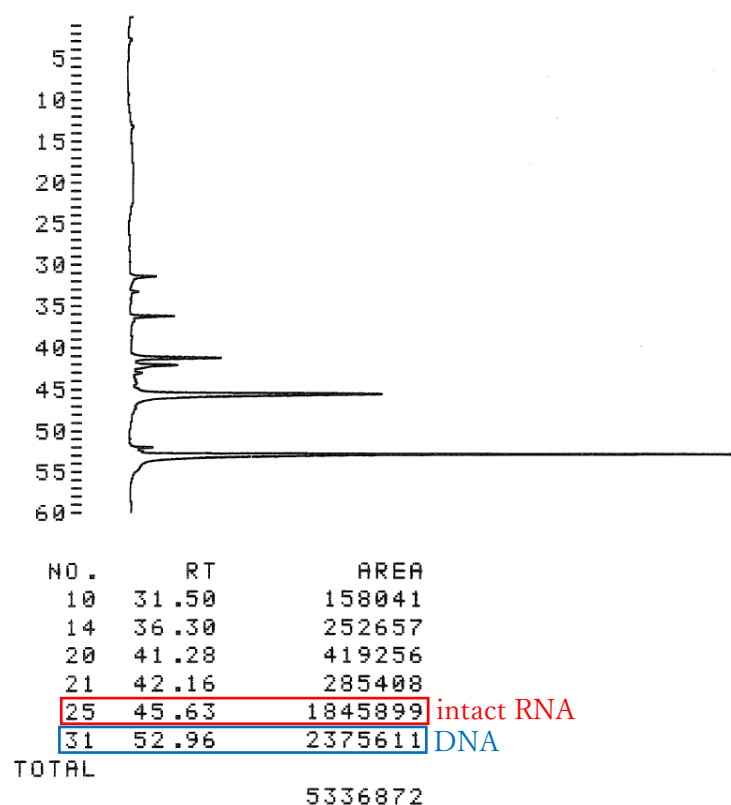

**Figure S156** RP-HPLC profile of the mixture of a 12mer DNA (D10) and a 24mer RNA (R12) in the absence of ODAGal4 after treatment with RNase H for 2 min (Figure 9, Run #1). The RP-HPLC analysis (UV detection at 260 nm) was performed using a linear gradient of 0%–6% CH<sub>3</sub>CN for 45 min, followed by a linear gradient of a linear gradient of 6%–30% for 15 min in 0.1 M AA buffer (pH 7.0) for 60 min at 50 °C with a flow rate of 0.5 mL/min.

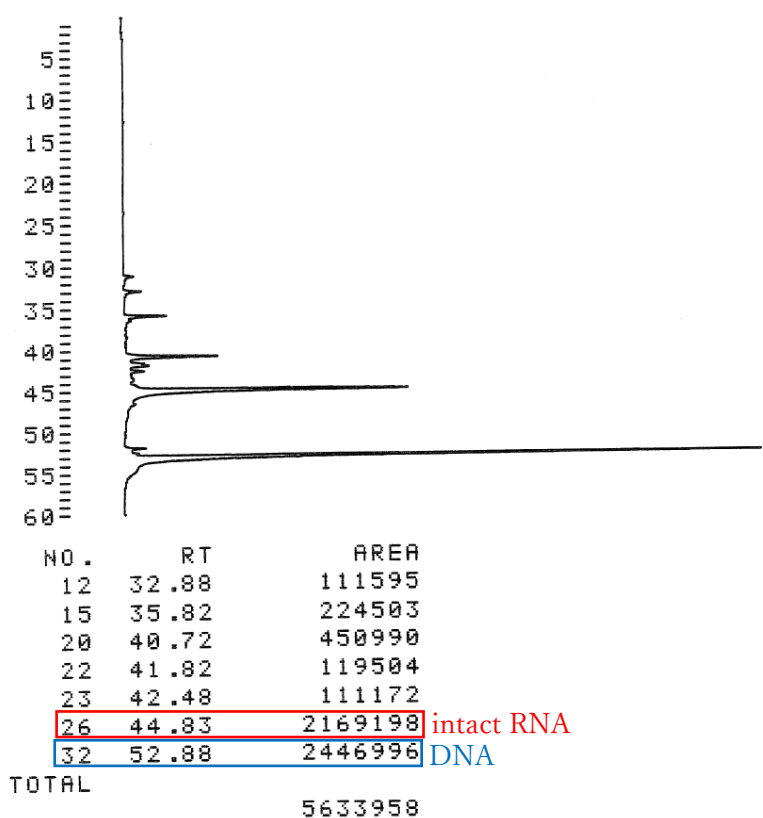

**Figure S157** RP-HPLC profile of the mixture of a 12mer DNA (D10) and a 24mer RNA (R12) in the presence of ODAGal4 after treatment with RNase H for 2 min (Figure 9, Run #1). The RP-HPLC analysis (UV detection at 260 nm) was performed using a linear gradient of 0%–6% CH<sub>3</sub>CN for 45 min, followed by a linear gradient of 6%–30% for 15 min in 0.1 M AA buffer (pH 7.0) for 60 min at 50 °C with a flow rate of 0.5 mL/min.

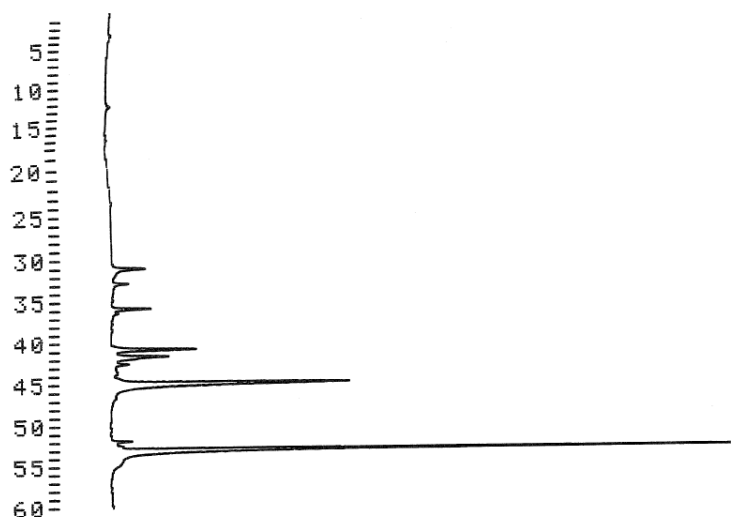

| NO.   | RT    | AREA    |            |
|-------|-------|---------|------------|
| 9     | 31.02 | 175768  |            |
| 12    | 35.82 | 136061  |            |
| 17    | 40.80 | 377300  |            |
| 18    | 41.63 | 342035  |            |
| 22    | 44.96 | 1759344 | intact RNA |
| 28    | 52.88 | 2413081 | DNA        |
| TOTAL |       | 5203589 |            |

**Figure S158** RP-HPLC profile of the mixture of a 12mer DNA (D10) and a 24mer RNA (R12) in the absence of ODAGal4 after treatment with RNase H for 2 min (Figure 9, Run #2). The RP-HPLC analysis (UV detection at 260 nm) was performed using a linear gradient of 0%–6% CH<sub>3</sub>CN for 45 min, followed by a linear gradient of 6%–30% for 15 min in 0.1 M AA buffer (pH 7.0) for 60 min at 50 °C with a flow rate of 0.5 mL/min.

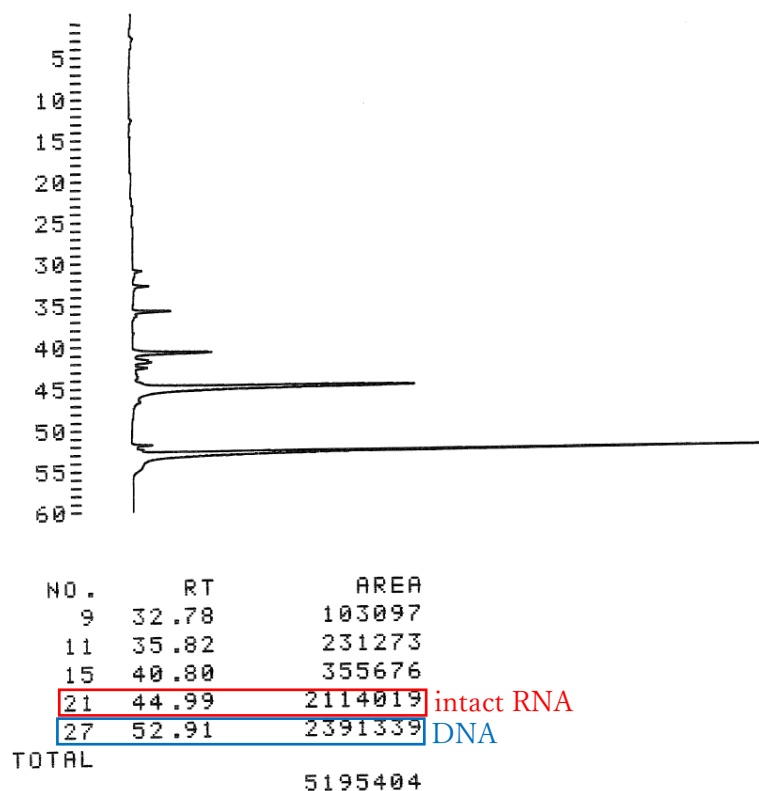

**Figure S159** RP-HPLC profile of the mixture of a 12mer DNA (D10) and a 24mer RNA (R12) in the presence of ODAGal4 after treatment with RNase H for 2 min (Figure 9, Run #2). The RP-HPLC analysis (UV detection at 260 nm) was performed using a linear gradient of 0%–6% CH<sub>3</sub>CN for 45 min, followed by a linear gradient of 6%–30% for 15 min in 0.1 M AA buffer (pH 7.0) for 60 min at 50 °C with a flow rate of 0.5 mL/min.

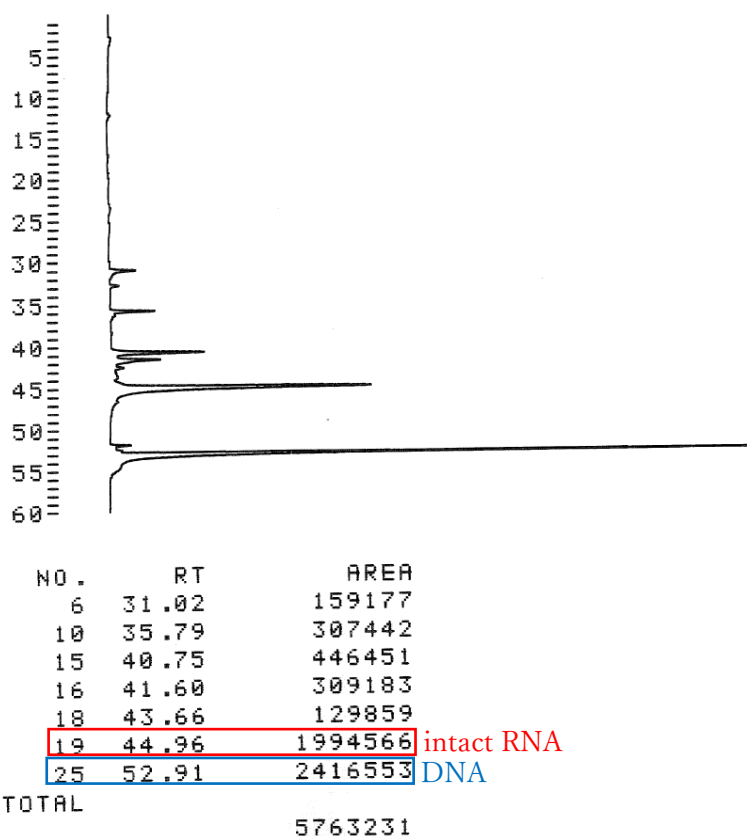

**Figure S160** RP-HPLC profile of the mixture of a 12mer DNA (D10) and a 24mer RNA (R12) in the absence of ODAGal4 after treatment with RNase H for 2 min (Figure 9, Run #3). The RP-HPLC analysis (UV detection at 260 nm) was performed using a linear gradient of 0%–6% CH<sub>3</sub>CN for 45 min, followed by a linear gradient of 6%–30% for 15 min in 0.1 M AA buffer (pH 7.0) for 60 min at 50 °C with a flow rate of 0.5 mL/min.

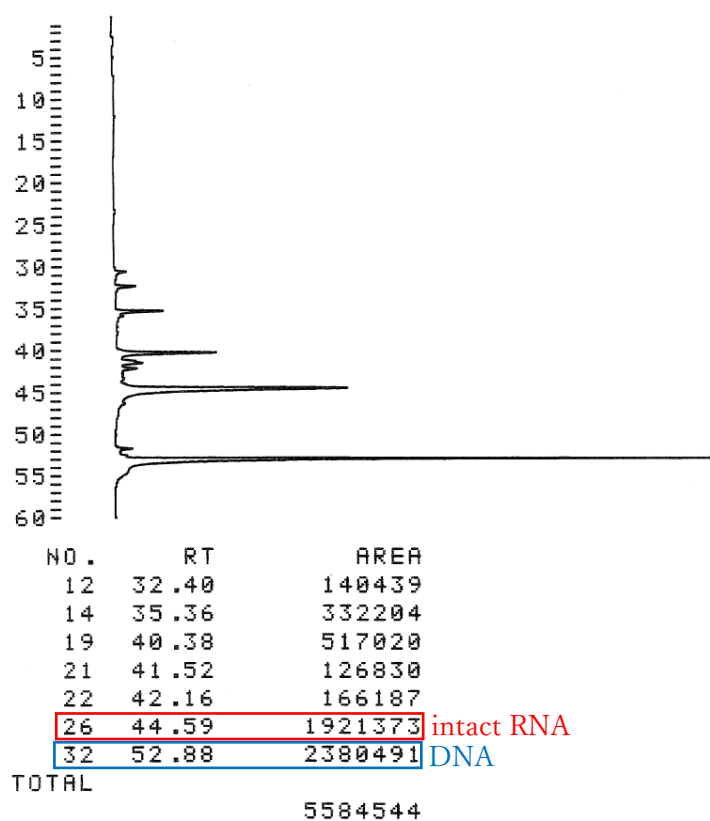

**Figure S161** RP-HPLC profile of the mixture of a 12mer DNA (D10) and a 24mer RNA (R12) in the presence of ODAGal4 after treatment with RNase H for 2 min (Figure 9, Run #3). The RP-HPLC analysis (UV detection at 260 nm) was performed using a linear gradient of 0%–6% CH<sub>3</sub>CN for 45 min, followed by a linear gradient of 6%–30% for 15 min in 0.1 M AA buffer (pH 7.0) for 60 min at 50 °C with a flow rate of 0.5 mL/min.

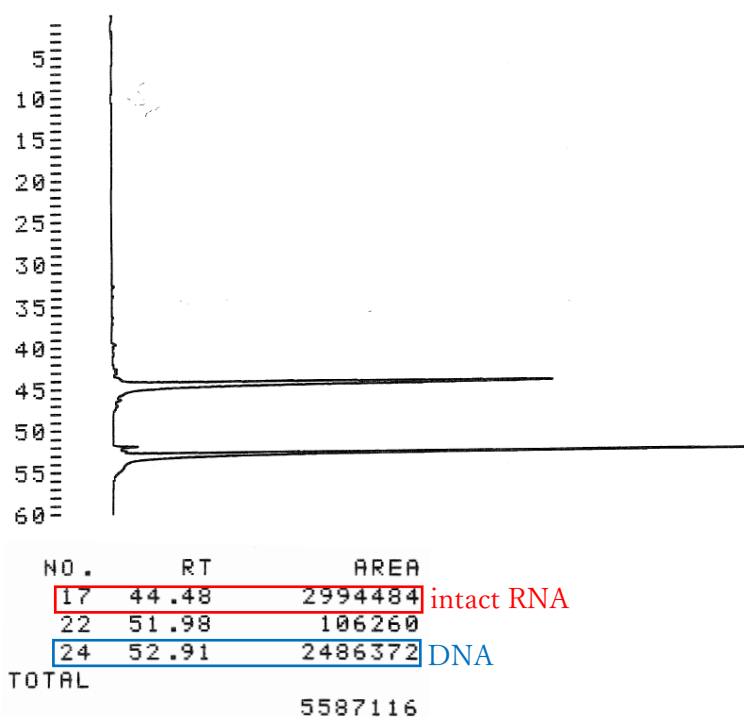

**Figure S162** RP-HPLC profile of the mixture of a 12mer DNA (D10) and a 24mer RNA (R15). The RP-HPLC analysis (UV detection at 260 nm) was performed using a linear gradient of 0%–6% CH<sub>3</sub>CN for 45 min, followed by a linear gradient of 6%–30% for 15 min in 0.1 M AA buffer (pH 7.0) for 60 min at 50 °C with a flow rate of 0.5 mL/min.

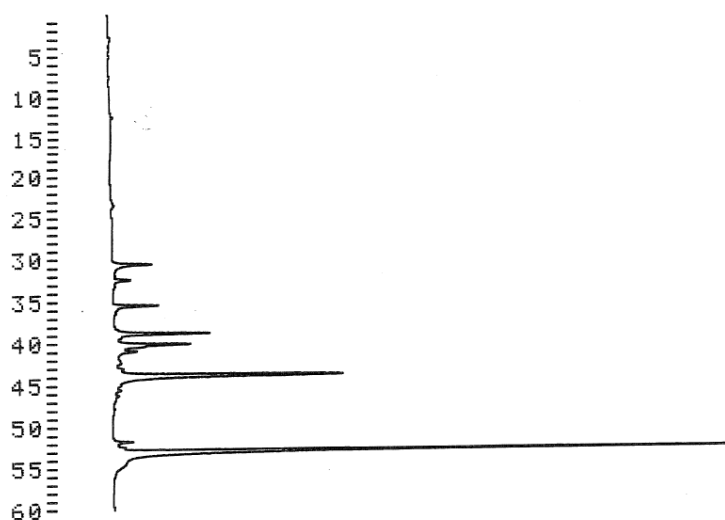

| NO.   | RT    | AREA    |
|-------|-------|---------|
| 9     | 30.62 | 209632  |
| 11    | 32.40 | 107579  |
| 13    | 35.44 | 230977  |
| 15    | 38.80 | 484434  |
| 16    | 40.11 | 479212  |
| 18    | 40.94 | 160148  |
| 22    | 43.87 | 1543716 |
| 30    | 52.88 | 2458326 |
| TOTAL |       | 5674024 |

intact RNA

DNA

**Figure S163** RP-HPLC profile of the mixture of a 12mer DNA (D10) and a 24mer RNA (R15) in the absence of ODAGal4 after treatment with RNase H for 2 min (Figure 9, Run #1). The RP-HPLC analysis (UV detection at 260 nm) was performed using a linear gradient of 0%–6% CH<sub>3</sub>CN for 45 min, followed by a linear gradient of 6%–30% for 15 min in 0.1 M AA buffer (pH 7.0) for 60 min at 50 °C with a flow rate of 0.5 mL/min.

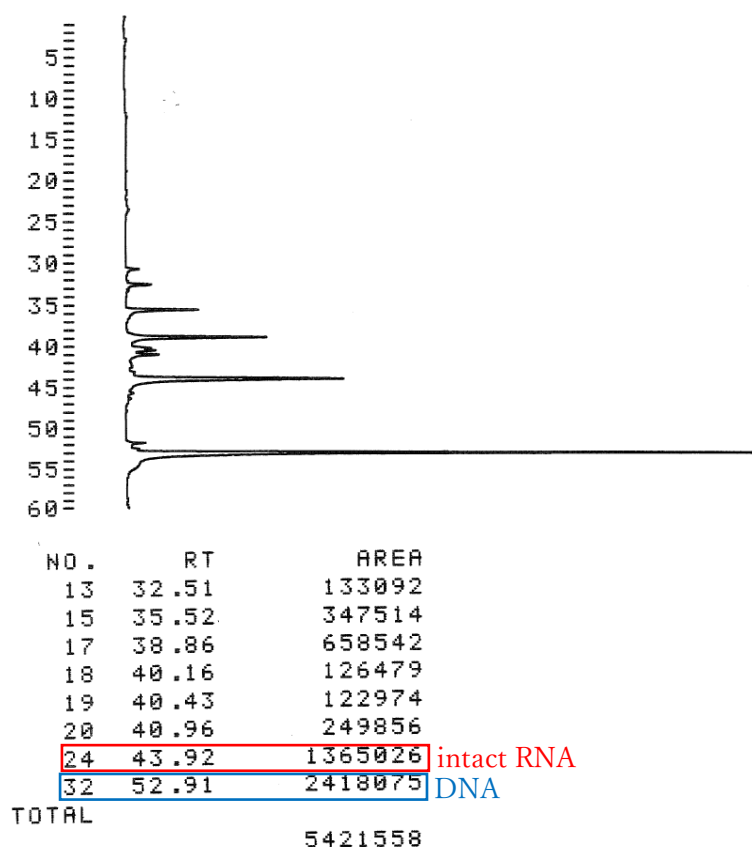

**Figure S164** RP-HPLC profile of the mixture of a 12mer DNA (D10) and a 24mer RNA (R15) in the presence of ODAGal4 after treatment with RNase H for 2 min (Figure 9, Run #1). The RP-HPLC analysis (UV detection at 260 nm) was performed using a linear gradient of 0%–6% CH<sub>3</sub>CN for 45 min, followed by a linear gradient of 6%–30% for 15 min in 0.1 M AA buffer (pH 7.0) for 60 min at 50 °C with a flow rate of 0.5 mL/min.

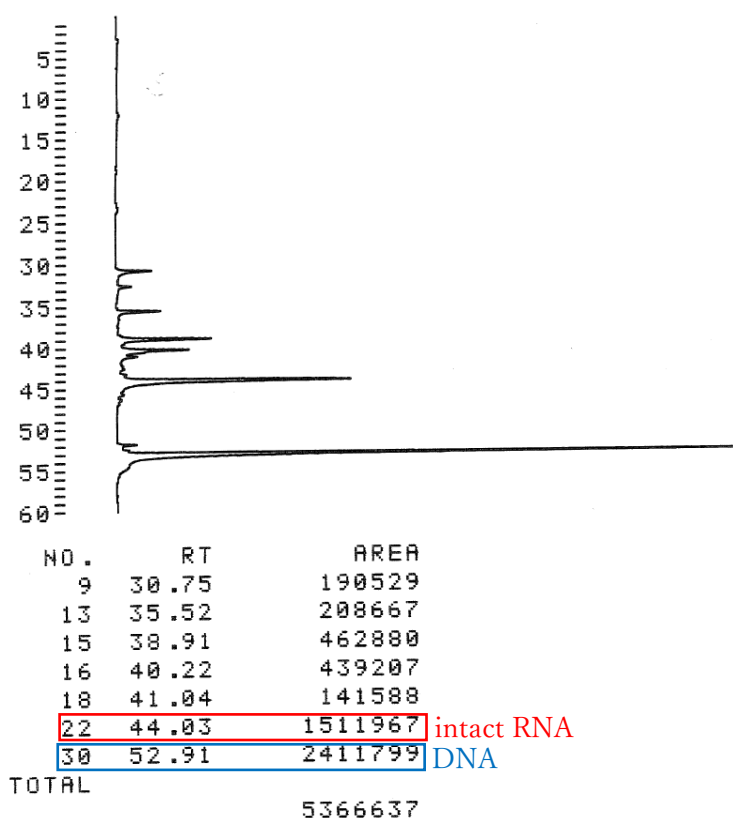

**Figure S165** RP-HPLC profile of the mixture of a 12mer DNA (D10) and a 24mer RNA (R15) in the absence of ODAGal4 after treatment with RNase H for 2 min (Figure 9, Run #2). The RP-HPLC analysis (UV detection at 260 nm) was performed using a linear gradient of 0%–6% CH<sub>3</sub>CN for 45 min, followed by a linear gradient of 6%–30% for 15 min in 0.1 M AA buffer (pH 7.0) for 60 min at 50 °C with a flow rate of 0.5 mL/min.

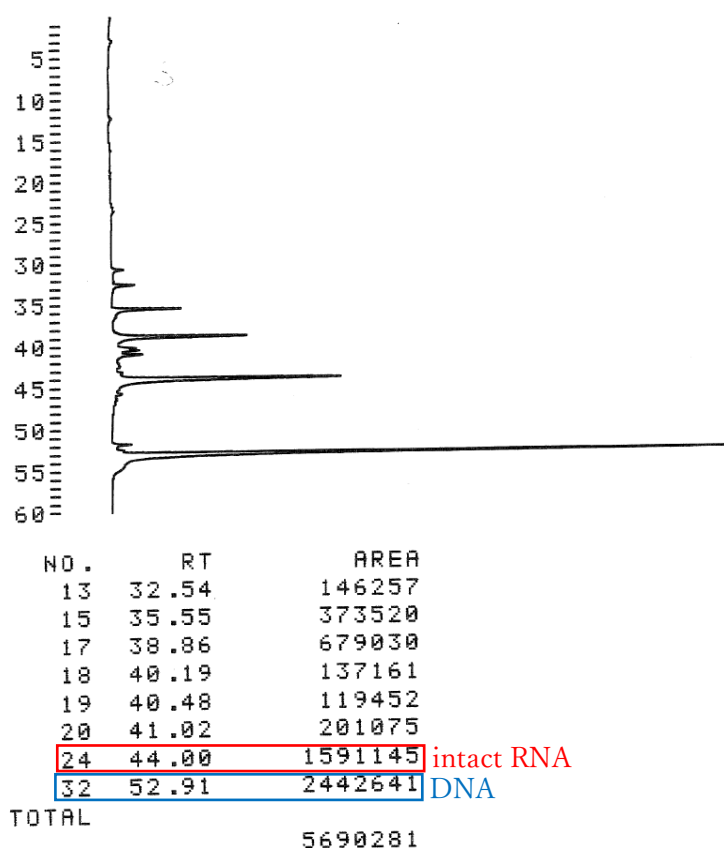

**Figure S166** RP-HPLC profile of the mixture of a 12mer DNA (D10) and a 24mer RNA (R15) in the presence of ODAGal4 after treatment with RNase H for 2 min (Figure 9, Run #2). The RP-HPLC analysis (UV detection at 260 nm) was performed using a linear gradient of 0%–6% CH<sub>3</sub>CN for 45 min, followed by a linear gradient of 6%–30% for 15 min in 0.1 M AA buffer (pH 7.0) for 60 min at 50 °C with a flow rate of 0.5 mL/min.

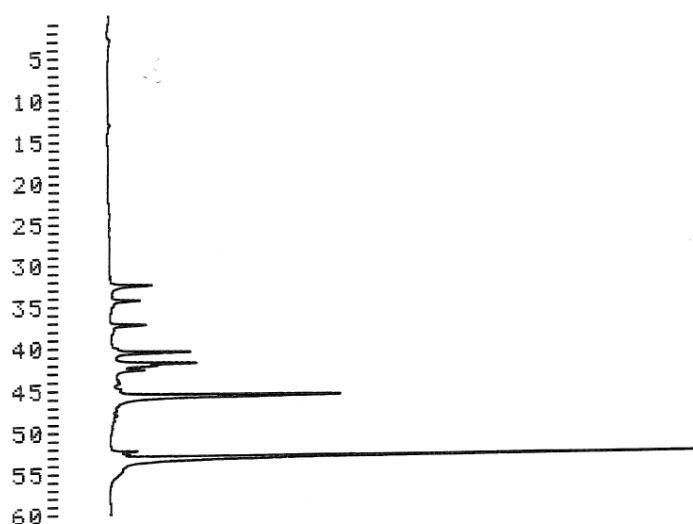

| NO.   | RT    | AREA    |
|-------|-------|---------|
| 10    | 32.48 | 250928  |
| 12    | 34.30 | 217705  |
| 14    | 37.28 | 228133  |
| 17    | 40.54 | 433293  |
| 18    | 41.84 | 399528  |
| 19    | 42.14 | 202801  |
| 20    | 42.64 | 337635  |
| 24    | 45.71 | 1560595 |
| 31    | 53.07 | 2391142 |
| TOTAL |       | 6021760 |

intact RNA

DNA

**Figure S167** RP-HPLC profile of the mixture of a 12mer DNA (D10) and a 24mer RNA (R15) in the absence of ODAGal4 after treatment with RNase H for 2 min (Figure 9, Run #3). The RP-HPLC analysis (UV detection at 260 nm) was performed using a linear gradient of 0%–6% CH<sub>3</sub>CN for 45 min, followed by a linear gradient of 6%–30% for 15 min in 0.1 M AA buffer (pH 7.0) for 60 min at 50 °C with a flow rate of 0.5 mL/min.

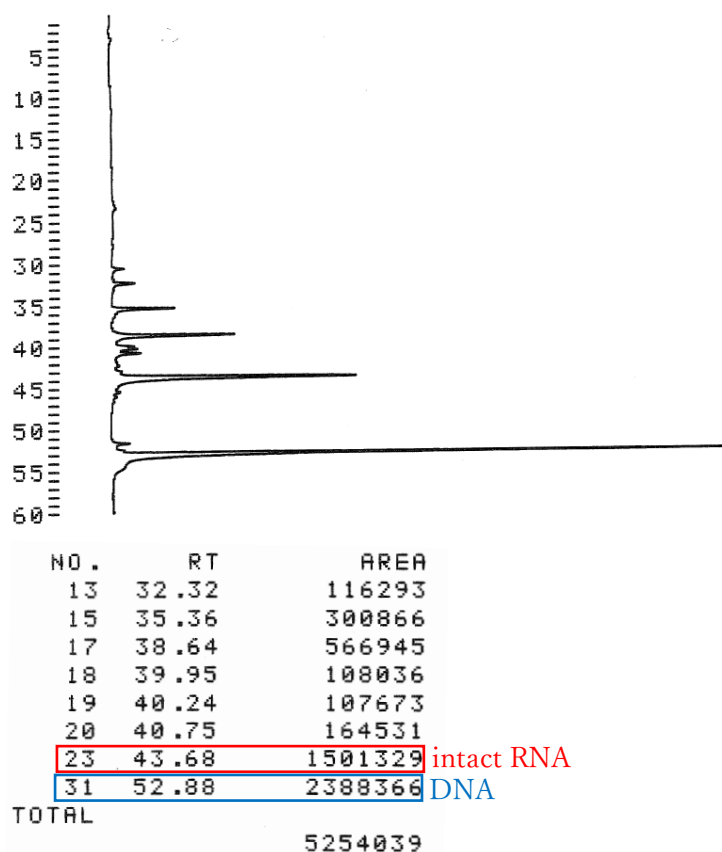

intact RNA

DNA

**Figure S168** RP-HPLC profile of the mixture of a 12mer DNA (D10) and a 24mer RNA (R15) in the presence of ODAGal4 after treatment with RNase H for 2 min (Figure 9, Run #3). The RP-HPLC analysis (UV detection at 260 nm) was performed using a linear gradient of 0%–6% CH<sub>3</sub>CN for 45 min, followed by a linear gradient of 6%–30% for 15 min in 0.1 M AA buffer (pH 7.0) for 60 min at 50 °C with a flow rate of 0.5 mL/min.

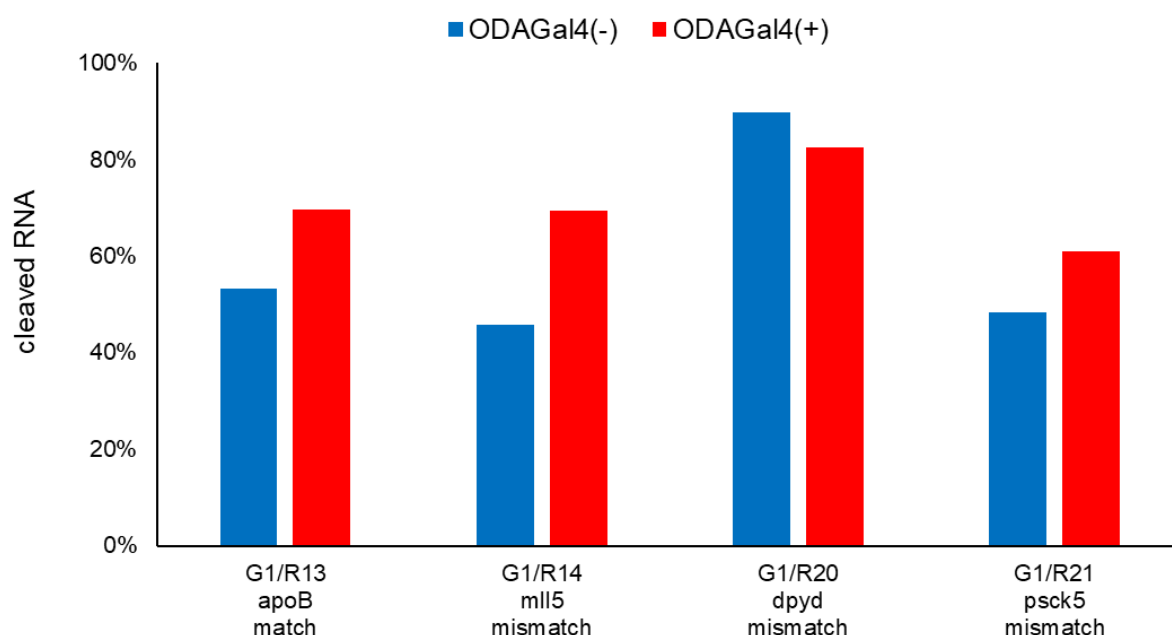

**Figure S169** Amounts of cleaved RNA after RNase H treatment (1 U/200  $\mu$ L for 10 min at 37  $^{\circ}$ C) of each 27mer RNA (1  $\mu$ M) with 13mer gapmer (G1, 1  $\mu$ M) in the absence or presence of ODAGal4 (n = 1). Sequences are follows;

G1: G<sup>LmC<sup>L</sup></sup>attggtatT<sup>LmC<sup>L</sup></sup>A<sup>L</sup> (all internucleotide linkages of G1 are phosphorothioated)

R13: CAUCACACUGAAUACCAAUGCUGGACU

R14: CAGUAUUUUGGAUACCAAUGCAUAGGA

R20: UUUUUAAUUUGAAUACCAAAGCGGUGUU

R21: UAAUGACUGGAAAACCAAUGCUGCUGG

x: DNA; X: RNA; X<sup>L</sup>: LNA; <sup>mC<sup>L</sup></sup>: LNA-5-methyl-C The underlined bases in the RNA sequence indicate the complementary region to D1; The characters in bold indicate mismatch bases. The sequence of R20 was based on the mouse dpyd mRNA (GenBank accession No.: NM\_170778), and the sequence of R21 was based on the mouse psck5 mRNA (GenBank accession No.: NM\_001190483).

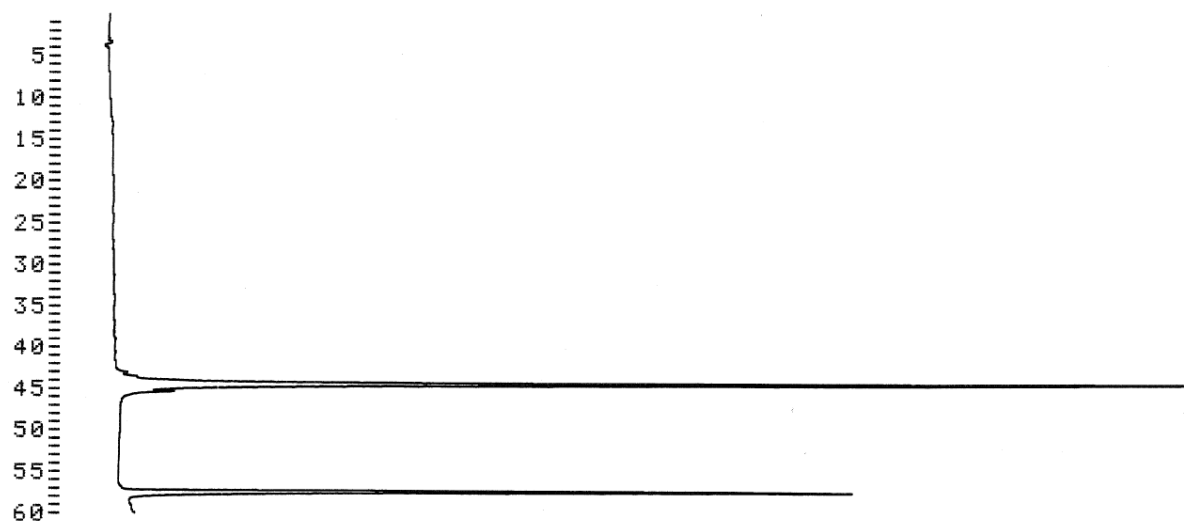

| NO.   | RT    | AREA    |            |
|-------|-------|---------|------------|
| 1     | 44.46 | 5409689 | intact RNA |
| 2     | 45.34 | 62875   |            |
| 3     | 57.42 | 2923795 | gapmer     |
| TOTAL |       | 8396359 |            |

**Figure S170** RP-HPLC profile of the mixture of a 13mer gapmer (G1) and 27mer RNA (R13). The RP-HPLC analysis (UV detection at 260 nm) was performed using a linear gradient of 0%–12.5% CH<sub>3</sub>CN for 50 min, followed by a linear gradient of 12.5%–50% for 10 min in 0.1 M TEAA buffer (pH 7.0) for 60 min at 50 °C with a flow rate of 0.5 mL/min.

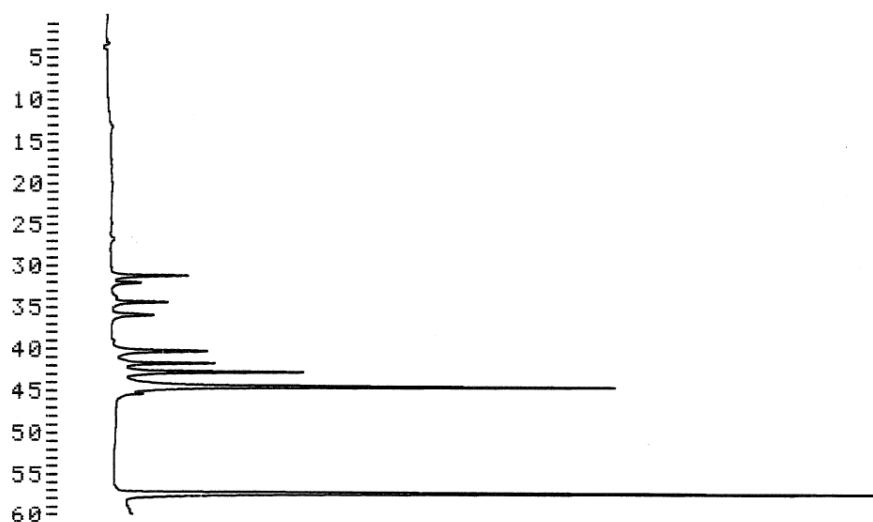

| NO.   | RT    | AREA    |            |
|-------|-------|---------|------------|
| 1     | 31.23 | 302433  |            |
| 2     | 32.06 | 117084  |            |
| 3     | 34.38 | 170582  |            |
| 4     | 35.95 | 205392  |            |
| 5     | 40.30 | 492953  |            |
| 6     | 41.76 | 449592  |            |
| 7     | 42.78 | 834905  |            |
| 8     | 44.54 | 2589667 | intact RNA |
| 9     | 57.36 | 2992305 | gapmer     |
| TOTAL |       | 8154913 |            |

**Figure S171** RP-HPLC profile of the mixture of a 13mer gapmer(G1) and 27mer RNA (R13) in the absence of ODAGal4 after treatment with RNase H for 10 min. The RP-HPLC analysis (UV detection at 260 nm) was performed using a linear gradient of 0%–12.5% CH<sub>3</sub>CN for 50 min, followed by a linear gradient of 12.5%–50% for 10 min in 0.1 M TEAA buffer (pH 7.0) for 60 min at 50 °C with a flow rate of 0.5 mL/min.

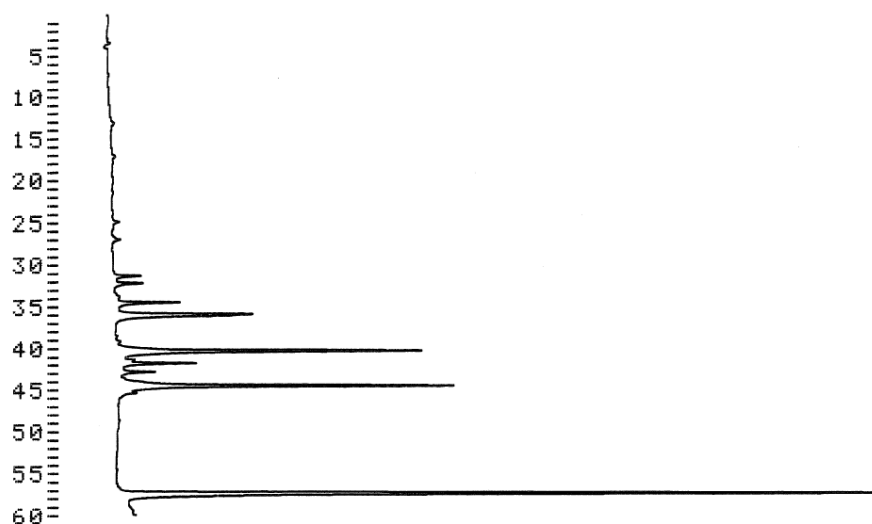

| NO.   | RT    | AREA    |            |
|-------|-------|---------|------------|
| 1     | 31.31 | 103105  |            |
| 2     | 32.16 | 112580  |            |
| 3     | 34.48 | 196205  |            |
| 4     | 35.90 | 735061  |            |
| 5     | 40.30 | 1601104 |            |
| 6     | 41.82 | 390768  |            |
| 7     | 42.83 | 189177  |            |
| 8     | 44.54 | 1670825 | intact RNA |
| 9     | 57.39 | 2976256 | gapmer     |
| TOTAL |       | 7975081 |            |

**Figure S172** RP-HPLC profile of the mixture of a 13mer gapmer(G1) and 27mer RNA (R13) in the presence of ODAGal4 after treatment with RNase H for 10 min. The RP-HPLC analysis (UV detection at 260 nm) was performed using a linear gradient of 0%–12.5% CH<sub>3</sub>CN for 50 min, followed by a linear gradient of 12.5%–50% for 10 min in 0.1 M TEAA buffer (pH 7.0) for 60 min at 50 °C with a flow rate of 0.5 mL/min.

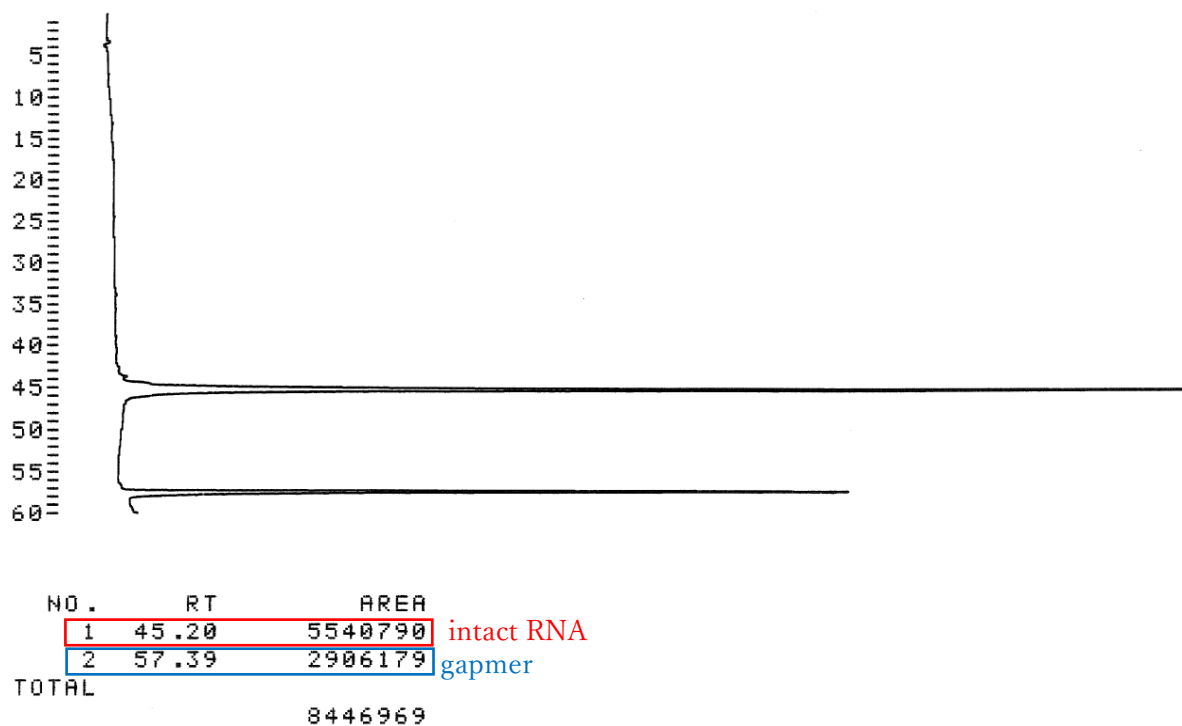

**Figure S173** RP-HPLC profile of the mixture of a 13mer gapmer(G1) and 27mer RNA (R14). The RP-HPLC analysis (UV detection at 260 nm) was performed using a linear gradient of 0%–12.5% CH<sub>3</sub>CN for 50 min, followed by a linear gradient of 12.5%–50% for 10 min in 0.1 M TEAA buffer (pH 7.0) for 60 min at 50 °C with a flow rate of 0.5 mL/min.

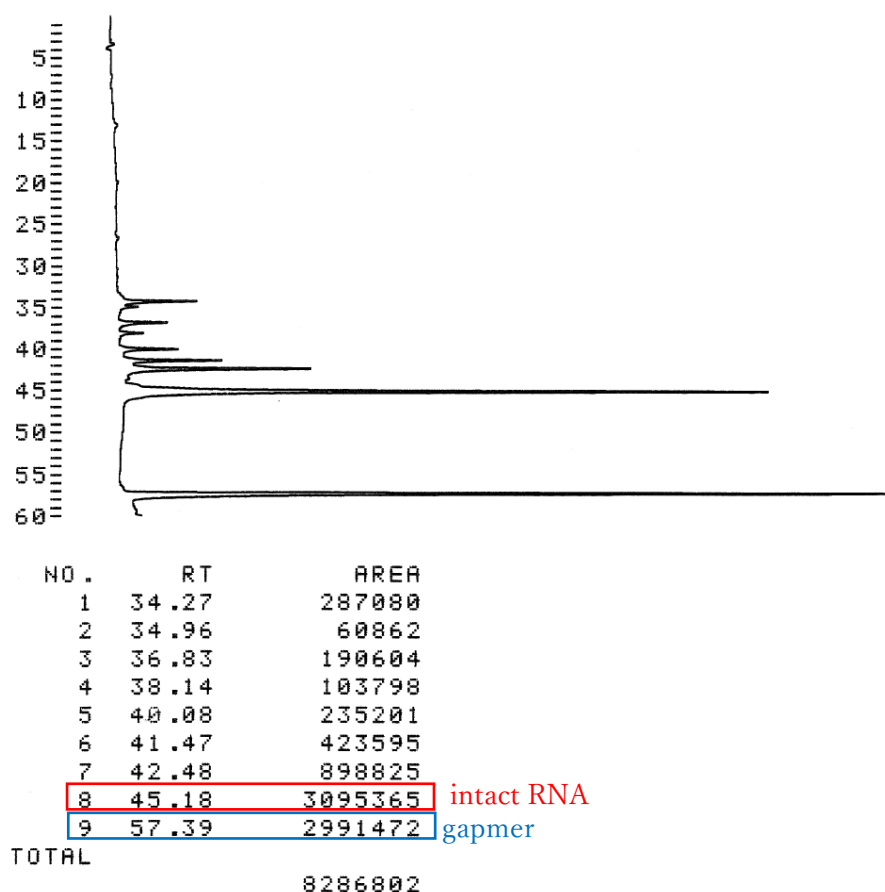

**Figure S174** RP-HPLC profile of the mixture of a 13mer gapmer(G1) and 27mer RNA (R14) in the absence of ODAGal4 after treatment with RNase H for 10 min. The RP-HPLC analysis (UV detection at 260 nm) was performed using a linear gradient of 0%–12.5% CH<sub>3</sub>CN for 50 min, followed by a linear gradient of 12.5%–50% for 10 min in 0.1 M TEAA buffer (pH 7.0) for 60 min at 50 °C with a flow rate of 0.5 mL/min.

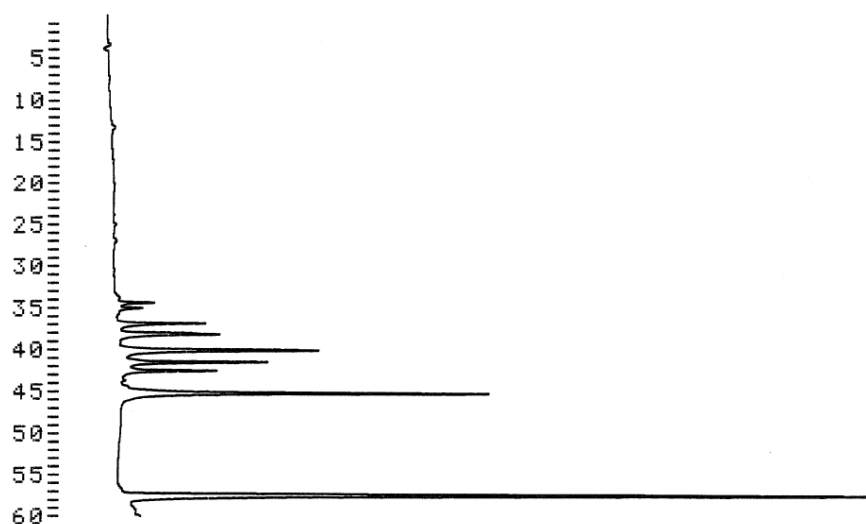

| NO.   | RT    | AREA    |            |
|-------|-------|---------|------------|
| 1     | 34.30 | 117157  |            |
| 2     | 34.99 | 88811   |            |
| 3     | 36.86 | 362018  |            |
| 4     | 38.14 | 569729  |            |
| 5     | 40.06 | 1044142 |            |
| 6     | 41.47 | 620947  |            |
| 7     | 42.48 | 459352  |            |
| 8     | 45.18 | 1708419 | intact RNA |
| 9     | 57.39 | 2935961 | gapmer     |
| TOTAL |       | 7906536 |            |

**Figure S175** RP-HPLC profile of the mixture of a 13mer gapmer(G1) and 27mer RNA (R14) in the presence of ODAGal4 after treatment with RNase H for 10 min. The RP-HPLC analysis (UV detection at 260 nm) was performed using a linear gradient of 0%–12.5% CH<sub>3</sub>CN for 50 min, followed by a linear gradient of 12.5%–50% for 10 min in 0.1 M TEAA buffer (pH 7.0) for 60 min at 50 °C with a flow rate of 0.5 mL/min.

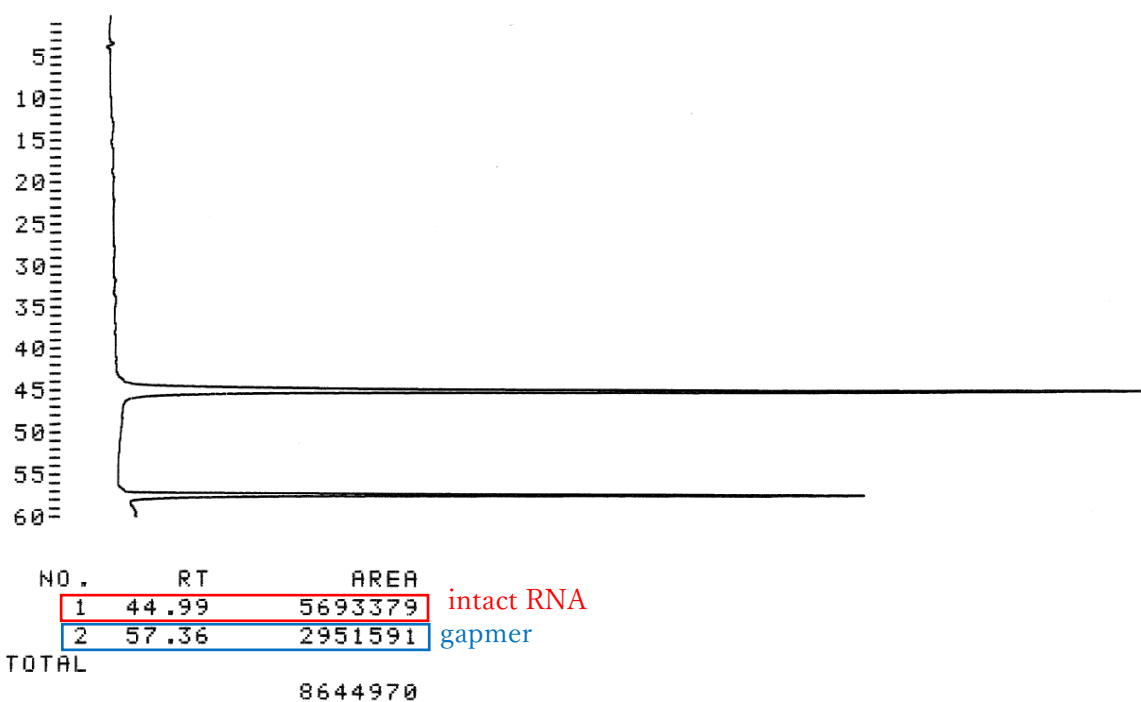

**Figure S176** RP-HPLC profile of the mixture of a 13mer gapmer(G1) and 27mer RNA (R20). The RP-HPLC analysis (UV detection at 260 nm) was performed using a linear gradient of 0%–12.5% CH<sub>3</sub>CN for 50 min, followed by a linear gradient of 12.5%–50% for 10 min in 0.1 M TEAA buffer (pH 7.0) for 60 min at 50 °C with a flow rate of 0.5 mL/min.

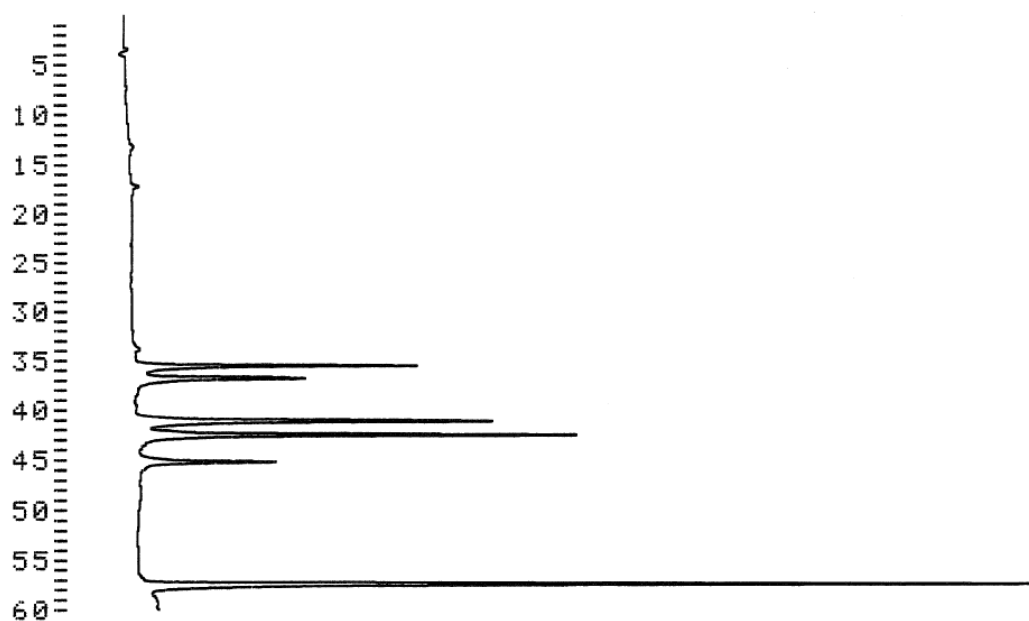

| NO.   | RT    | AREA    |            |
|-------|-------|---------|------------|
| 1     | 35.47 | 915750  |            |
| 2     | 36.78 | 798291  |            |
| 3     | 41.07 | 1469545 |            |
| 4     | 42.46 | 1571985 |            |
| 5     | 45.15 | 584346  | intact RNA |
| 6     | 57.36 | 2971111 | gapmer     |
| TOTAL |       | 8311028 |            |

**Figure S177** RP-HPLC profile of the mixture of a 13mer gapmer(G1) and 27mer RNA (R20) in the absence of ODAGal4 after treatment with RNase H for 10 min. The RP-HPLC analysis (UV detection at 260 nm) was performed using a linear gradient of 0%–12.5% CH<sub>3</sub>CN for 50 min, followed by a linear gradient of 12.5%–50% for 10 min in 0.1 M TEAA buffer (pH 7.0) for 60 min at 50 °C with a flow rate of 0.5 mL/min.

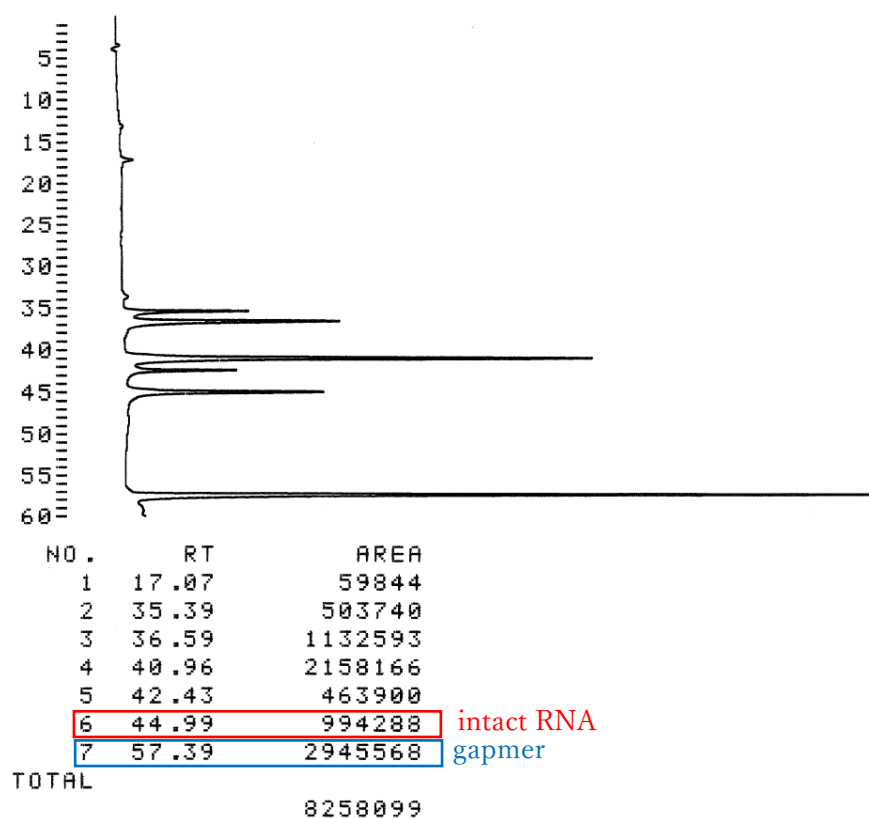

**Figure S178** RP-HPLC profile of the mixture of a 13mer gapmer(G1) and 27mer RNA (R20) in the presence of ODAGal4 after treatment with RNase H for 10 min. The RP-HPLC analysis (UV detection at 260 nm) was performed using a linear gradient of 0%–12.5% CH<sub>3</sub>CN for 50 min, followed by a linear gradient of 12.5%–50% for 10 min in 0.1 M TEAA buffer (pH 7.0) for 60 min at 50 °C with a flow rate of 0.5 mL/min.

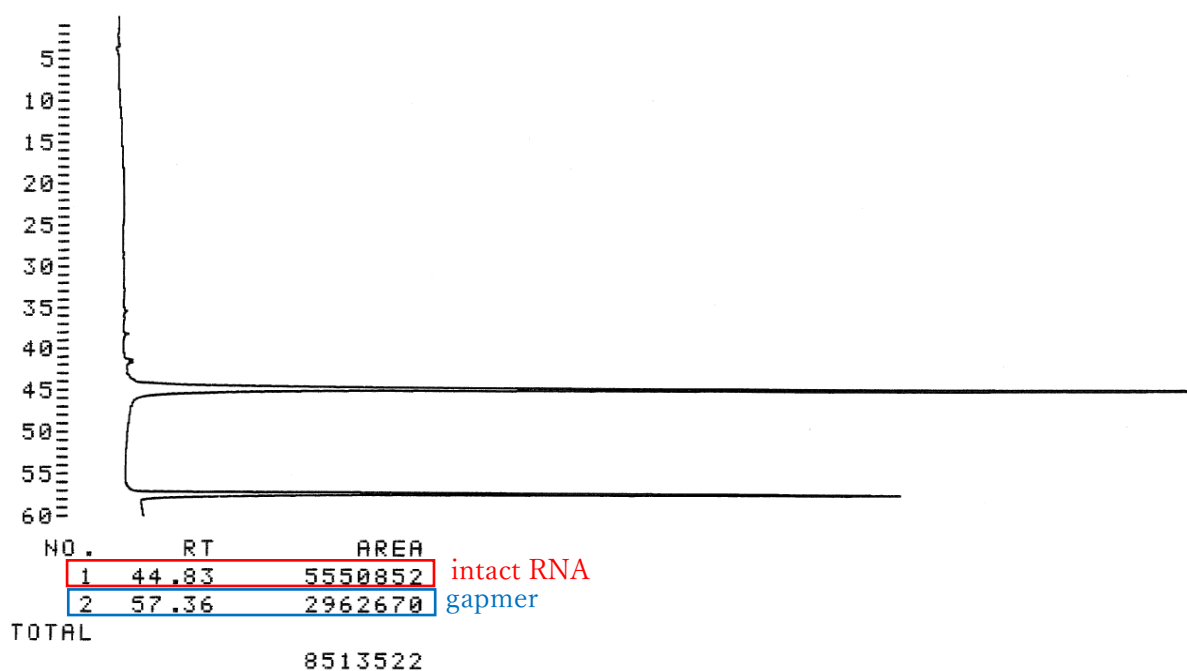

**Figure S179** RP-HPLC profile of the mixture of a 13mer gapmer(G1) and 27mer RNA (R21, pcsk5). The RP-HPLC analysis (UV detection at 260 nm) was performed using a linear gradient of 0%–12.5% CH<sub>3</sub>CN for 50 min, followed by a linear gradient of 12.5%–50% for 10 min in 0.1 M TEAA buffer (pH 7.0) for 60 min at 50 °C with a flow rate of 0.5 mL/min.

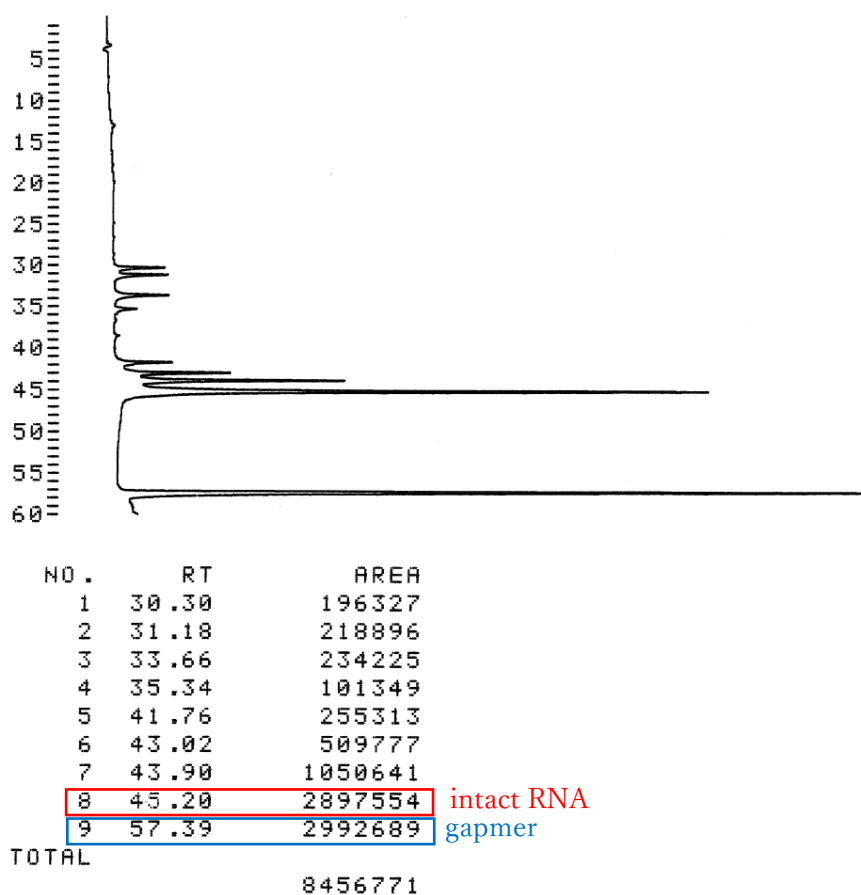

**Figure S180** RP-HPLC profile of the mixture of a 13mer gapmer(G1) and 27mer RNA (R21) in the absence of ODAGal4 after treatment with RNase H for 10 min. The RP-HPLC analysis (UV detection at 260 nm) was performed using a linear gradient of 0%–12.5% CH<sub>3</sub>CN for 50 min, followed by a linear gradient of 12.5%–50% for 10 min in 0.1 M TEAA buffer (pH 7.0) for 60 min at 50 °C with a flow rate of 0.5 mL/min.

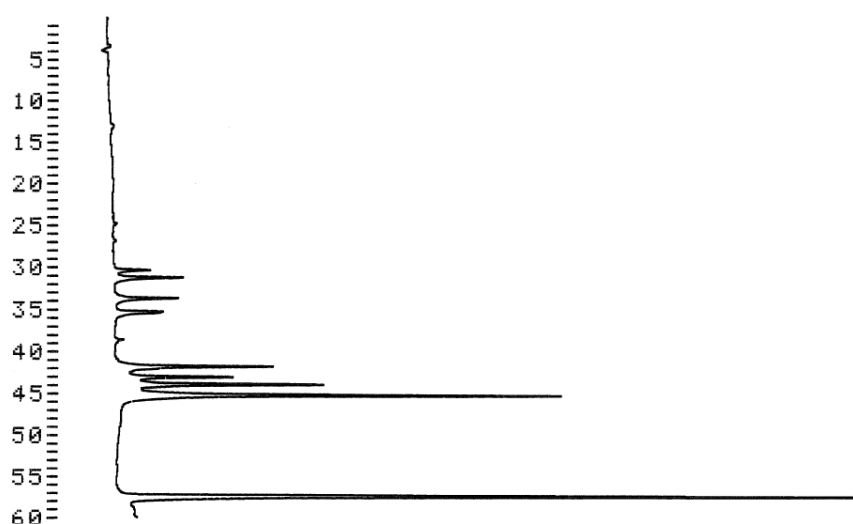

| NO .  | RT    | AREA    |            |
|-------|-------|---------|------------|
| 1     | 30.32 | 136016  |            |
| 2     | 31.20 | 285099  |            |
| 3     | 33.68 | 269969  |            |
| 4     | 35.26 | 271561  |            |
| 5     | 41.76 | 784896  |            |
| 6     | 43.04 | 509932  |            |
| 7     | 43.92 | 951236  |            |
| 8     | 45.20 | 2164651 | intact RNA |
| 9     | 57.36 | 2969989 | gapmer     |
| TOTAL |       | 8343349 |            |

**Figure S181** RP-HPLC profile of the mixture of a 13mer gapmer(G1) and 27mer RNA (R21) in the presence of ODAGal4 after treatment with RNase H for 10 min. The RP-HPLC analysis (UV detection at 260 nm) was performed using a linear gradient of 0%–12.5% CH<sub>3</sub>CN for 50 min, followed by a linear gradient of 12.5%–50% for 10 min in 0.1 M TEAA buffer (pH 7.0) for 60 min at 50 °C with a flow rate of 0.5 mL/min.

## UV melting analysis

It should be noted that the melting temperatures ( $T_m$  values) of the DNA/RNA hybrids used in the manuscript were not correctly calculated in some cases because UV absorbance-versus-temperature curves of even single-stranded of 24mer RNAs have inflection points (Figure S182 and S183). Instead, we evaluated the effect of ODAGal4 on the thermal stability of fully-matched or mismatched DNA/RNA hybrids using 12mer DNA/12mer RNA hybrids (Figure S184 and Table S1).

## General procedure

The absorbance versus temperature profile measurements were conducted with an eight-sample cell changer, in quartz cells of 1 cm pathlength. All the experiments were conducted in a 10 mM phosphate buffer containing 100 mM NaCl at pH = 7.0. The difference of the UV absorbances at 260 and 320 nm was monitored with the temperature. The samples containing oligonucleotides were first rapidly heated to 95 °C, left at this temperature for 10 min, and then cooled to room temperature at a rate of 0.5 °C/min. After annealing, an aqueous solution of ODAGal4 was added so that ODAGal4 concentration was equal to that of the hybrid or single strand in the case of adding ODAGal4. The final concentration of hybrid duplexes or single-stranded RNAs was 2  $\mu$ M (for Figure S182 and Figure S183) or 5  $\mu$ M (for Figure S184). These samples were additionally cooled to 0 °C at a rate of 0.5 °C/min, left at this temperature, and then the dissociation finally recorded by heating to 95 °C at a rate of 0.5 °C/min.

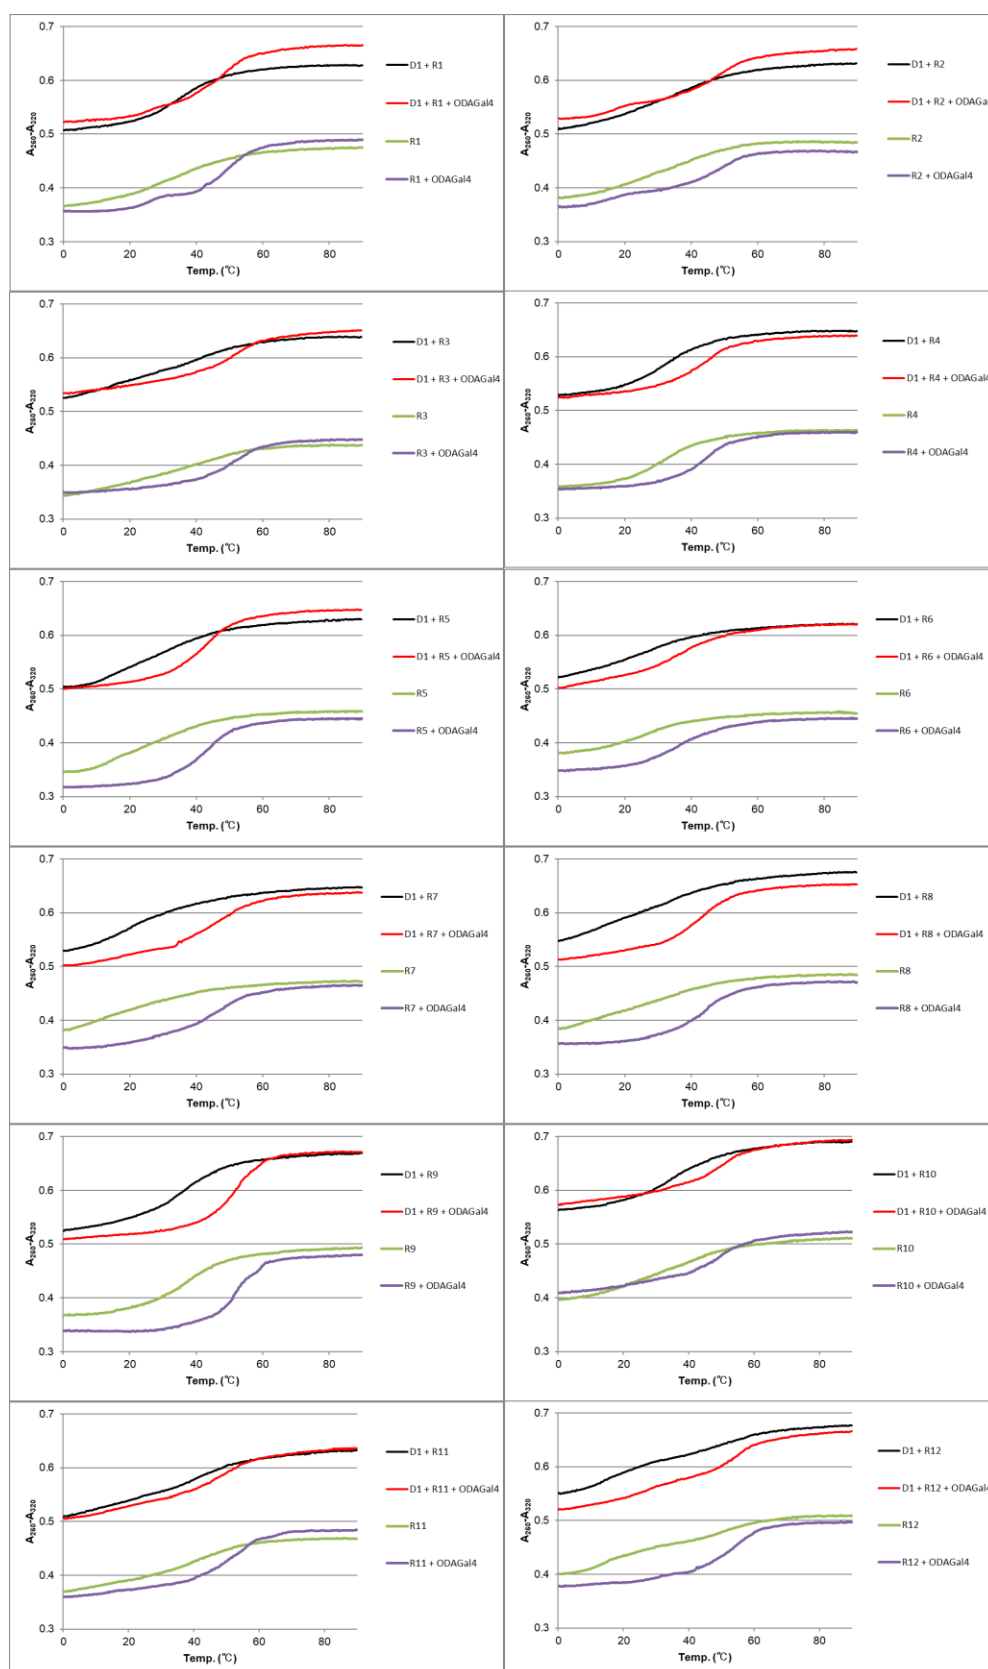

**Figure S182** UV melting curves of the duplexes of a DNA (D1) and an RNA (R1–R12) or single-stranded RNAs (R1–R12) in the absence or presence of ODAGal4; black line: a DNA/RNA hybrid in the absence of ODAGal4; red line: a DNA/RNA hybrid in the presence of ODAGal4; green line: a single stranded RNA in the absence of ODAGal4; purple line: a single stranded RNA in the presence of ODAGal4.

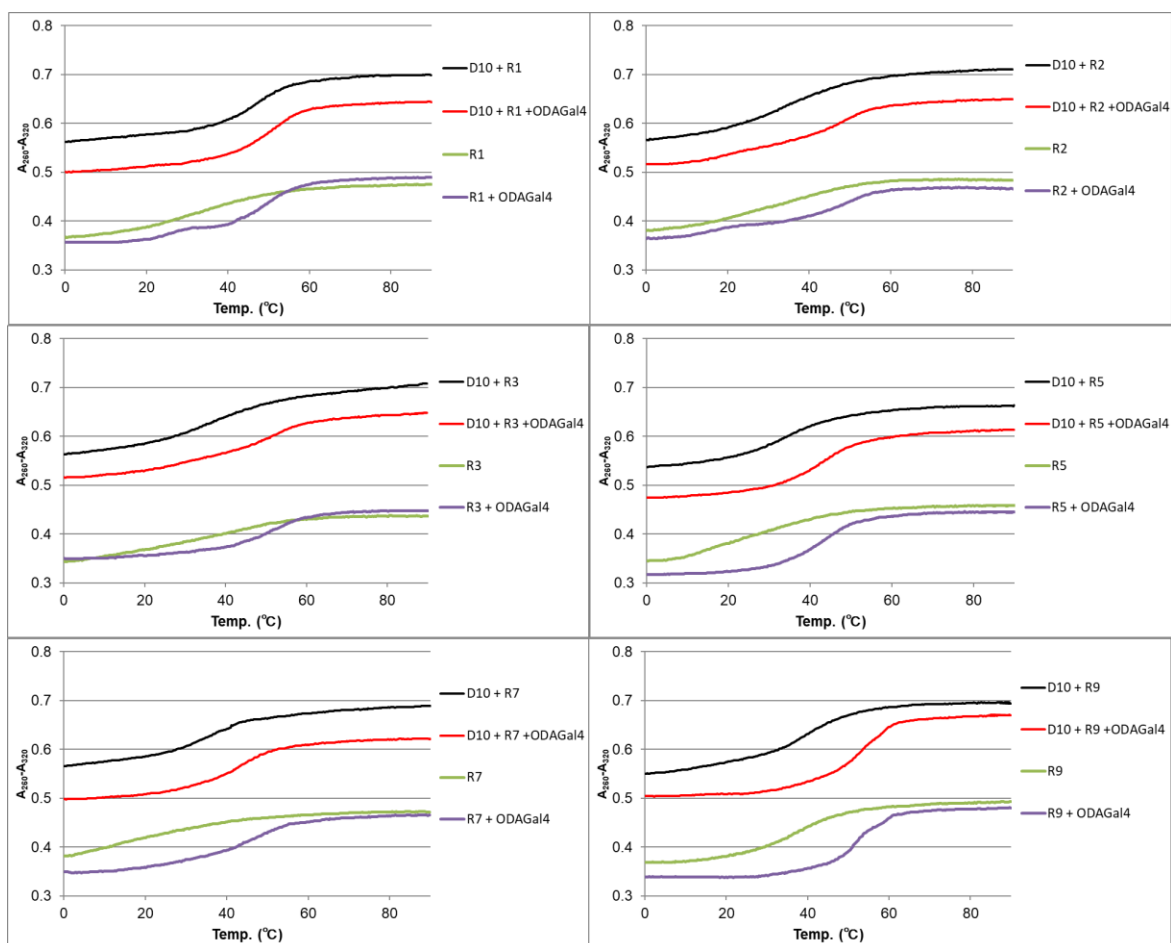

**Figure S183** UV melting curves of the duplexes of a DNA (D10) and an RNA (R1, R2, R3, R5, R7, and R9) or single-stranded RNAs in the absence or presence of ODAGal4; black line: a DNA/RNA hybrid in the absence of ODAGal4; red line: a DNA/RNA hybrid in the presence of ODAGal4; green line: a single stranded RNA in the absence of ODAGal4; purple line: a single stranded RNA in the presence of ODAGal4. Data of single RNAs (green and purple lines) are same as those of Figure S182.

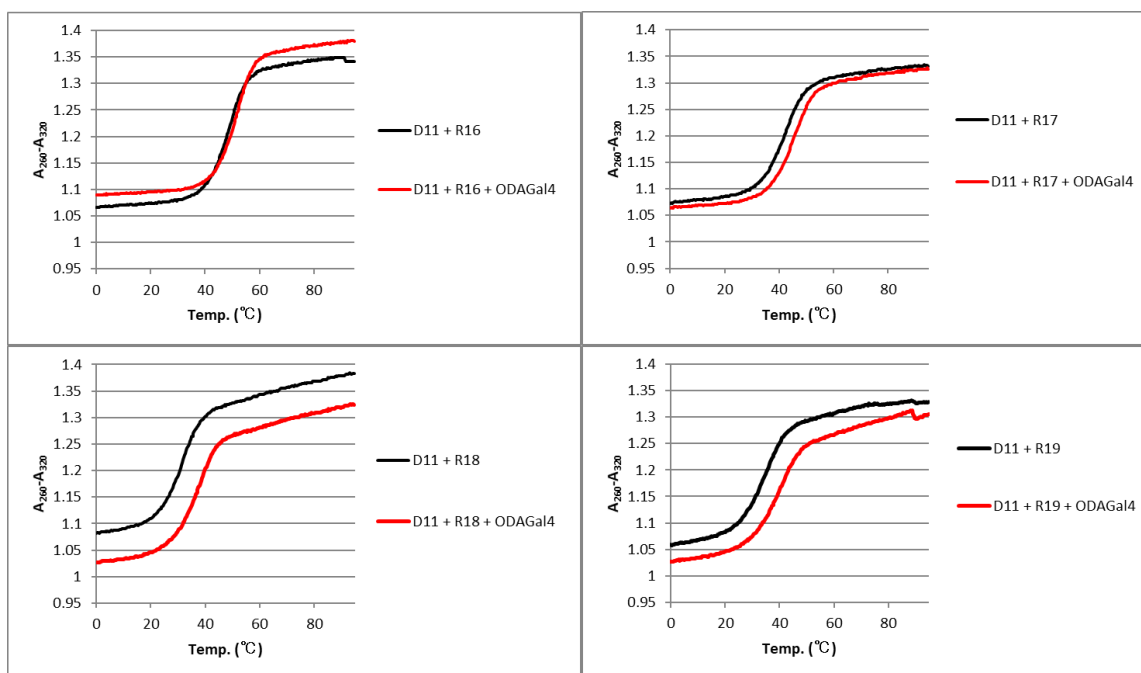

**Figure S184** UV melting curves of the duplexes of DNA (D11: cagtcagtcagt) and an RNA (R16: ACUGACUGACUG, R17: AAUGACUGACUG, R18: ACUGAAUGACUG, R19: ACUGACUGAAUG, each bold character indicates a mismatch base) in the absence or presence of ODAGal4.

Table S1  $T_m$  values of DNA/RNA hybrids in the absence or presence of ODAGal4

| Entry | DNA               | RNA               | $T_m$ value/°C ( $\Delta T_m$ ) |                |
|-------|-------------------|-------------------|---------------------------------|----------------|
|       |                   |                   | ODAGal4<br>(-)                  | ODAGal4<br>(+) |
| 1     | D11: cagtcagtcagt | R16: ACUGACUGACUG | 48.0                            | 50.9 (+ 2.9)   |
| 2     | D12: cagtcagtcagt | R17: AAUGACUGACUG | 41.7                            | 45.1 (+ 3.4)   |
| 3     | D13: cagtcagtcagt | R18: ACUGAAUGACUG | 31.3                            | 36.3 (+ 5.0)   |
| 4     | D14: cagtcagtcagt | R19: ACUGACUGAAUG | 34.3                            | 38.5 (+ 4.2)   |
